# Supplementary material
Source: PubMed Central journal article supplement (PMC3197777)

SUPPORTING INFORMATION FOR

**Regio- and Stereo-selective Syntheses of the Natural Product  
CCR5 Antagonist Anibamine and its Three Olefin Isomers**

**Feng Zhang, Saheem Zaidi, Kendra M. Haney, Glen E. Kellogg, Yan Zhang\***

*Department of Medicinal Chemistry, Virginia Commonwealth  
University, 800 E. Leigh Street, Richmond, VA 23298, USA*

*Email address: yzhang2@vcu.edu*

**HPLC methods and purity test results:  
Spectra:**

**S2-S10  
S11-S96**

**HPLC methods and purity analysis results:**

HPLC System: Varian Prostar;

Column: Microsorb 100-5 CN (250 × 10 mm);

Injection Volume: 15 -20 µL;

Sample Concentrations: 0.1 – 1.2 mg/0.5 mL in mobile phase;

Single wavelength: 254 nm;

Eluent: acetonitrile (0.5% TFA)/water (60:40) at 4 mL/min over 30 min.

**Table. HPLC purity analysis of target compounds**

| <b>Compounds</b> | <b>Compounds code<br/>in spectrum</b> | <b>Time (min)</b> | <b>Purity (%)</b> |
|------------------|---------------------------------------|-------------------|-------------------|
| 1                | VZAB001                               | 11.438            | 97.02             |
| 2                | VZAB002                               | 14.930            | 96.54             |
| 3                | VZAB046                               | 11.386            | 99.39             |
| 4                | VZAB047                               | 11.770            | 97.73             |

vzab001\_fz-1

Title : VZAB001  
Run File : c:\star\data\yy\anibamine analogs final  
result\vzab001-009\redo\vzab001\_fz.run  
Method File : c:\star\data\yy\anibamine analogs final  
result\vzab001-009\redo\vzab001\_fz-1.mth  
Sample ID : Manual Sample

Injection Date: 2011-2-2 11:58 Calculation Date: 2011-2-2 12:34

Operator : Yan Zhang Group Detector Type: 0325  
Workstation: D9288P71 Bus Address : 44  
Instrument : Varian Star #1 Sample Rate : 20.00 Hz  
Channel : 1 = 254 nm Run Time : 30.000 min

\*\* LC Workstation Version 6.41 \*\* 03046-67D0-AE7-0264 \*\*

Run Mode : Analysis  
Peak Measurement: Peak Area  
Calculation Type: Percent

| Peak No. | Peak Name | Result (%) | Ret. Time (min) | Time Offset (min) | Area (counts) | Sep. Code | Width 1/2 (sec) | Status Codes |
|----------|-----------|------------|-----------------|-------------------|---------------|-----------|-----------------|--------------|
| 1        |           | 2.9828     | 4.668           | 0.000             | 128569        | BB        | 5.5             |              |
| 2        |           | 97.0172    | 11.438          | 0.000             | 4181743       | BB        | 19.6            |              |
| Totals:  |           | 100.0000   |                 | 0.000             | 4310312       |           |                 |              |

Total Unidentified Counts : 4310312 counts

Detected Peaks: 2 Rejected Peaks: 0 Identified Peaks: 0

Multiplier: 1 Divisor: 1 Unidentified Peak Factor: 0

Baseline Offset: 0 microAU LSB: 0.1 microAU

Noise (used): 1 microAU - monitored before this run

Manual injection

\*\*\*\*\*

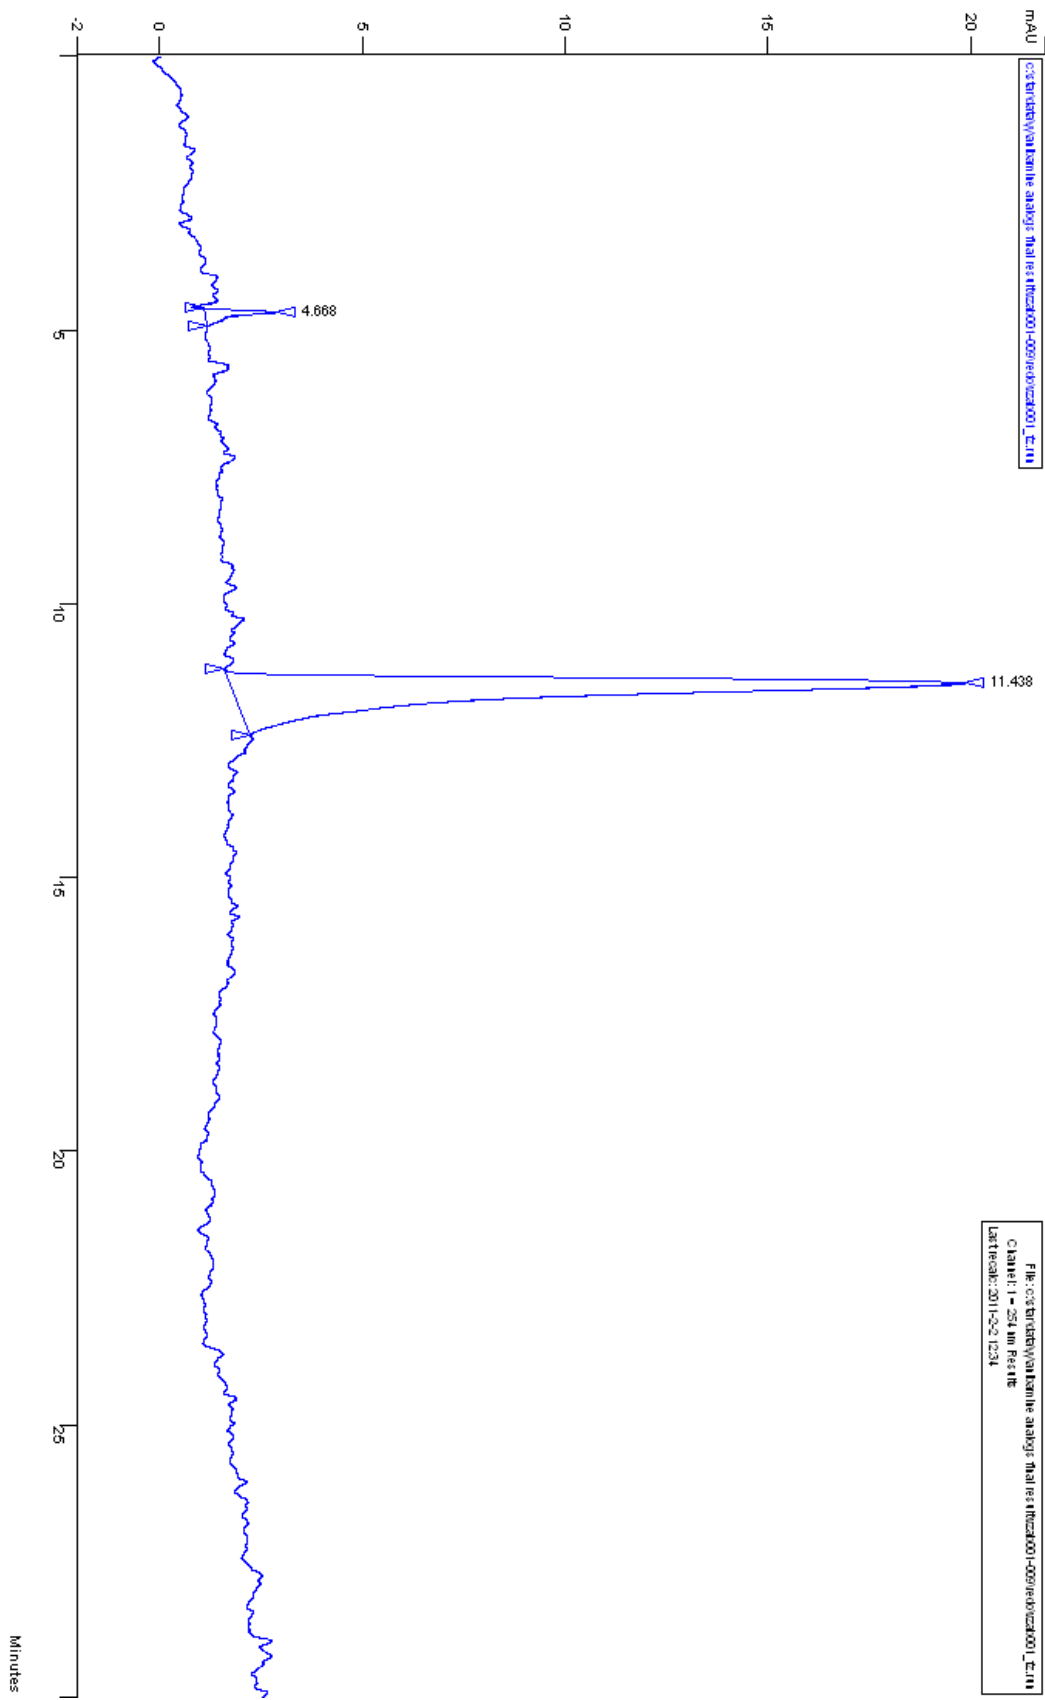

VZAB002\_1\_FZ

File c:\star\data\yy\anibamine analogs final result\vzab002\_1\_fz.run Filetype  
325

WTOASCII Parameters: C:\star\WTOASCII.TXT

1 channels  
 Channel 1 254 nm in AU  
 Base rate 20.0000 Hz Bunch 1 Effective rate 20.00000 Hz. T = 0.000833 min.  
 36000 points from 0.000 to 30.000 minutes  
 Sampling every 4 point(s)  
 Printing points from 0.000 to 30.000 min, point 0 to 35999  
 Channels 1 to 1  
 Results for Channel 1 = 254 nm  
 Title: Report Title  
 Run File: c:\star\data\yy\anibamine analogs final result\vzab002\_1\_fz.run

-----  
 Injection Info  
 -----

Method: C:\star\data\YY\40H2060MeCN4m130MIN.mth  
 Sample: Manual Sample  
 Injection Date: Fri Oct 29 10:53:26 2010  
 Manual injection  
 Operator: Yan Zhang Group  
 Instrument: Varian Star #1  
 Notes:

-----  
 Misc Info  
 -----

Workstation: D9288P71  
 Bus Address: 44  
 Run Time: 0.000 to 30.000 min.

-----  
 Recalc Info  
 -----

Recalc Method: c:\star\data\yy\anibamine analogs final result\vzab002\_1\_fz-1.mth  
 Recalc Date: Fri Nov 19 09:20:20 2010  
 Operator: Yan Zhang Group  
 Instrument: Varian Star #1  
 Notes:  
 Sample Rate: 20.000 Hz.  
 Measurement Type: 1 = Area  
 Calculation Type: 1 = %  
 Normalize Results: Yes

-----  
 Peak Info for Channel 1  
 -----

| 3 Peaks (tR | Time offset | RRT    | SePCODE | width | Counts   | Result)   |
|-------------|-------------|--------|---------|-------|----------|-----------|
| 4.291       | 0.000       | 0.0000 | BP      | 21.98 | 233477   | 1.197045  |
| 6.088       | 0.000       | 0.0000 | PB      | 16.92 | 441300   | 2.262559  |
| 14.930      | 0.000       | 0.0000 | BB      | 33.28 | 18829690 | 96.540390 |

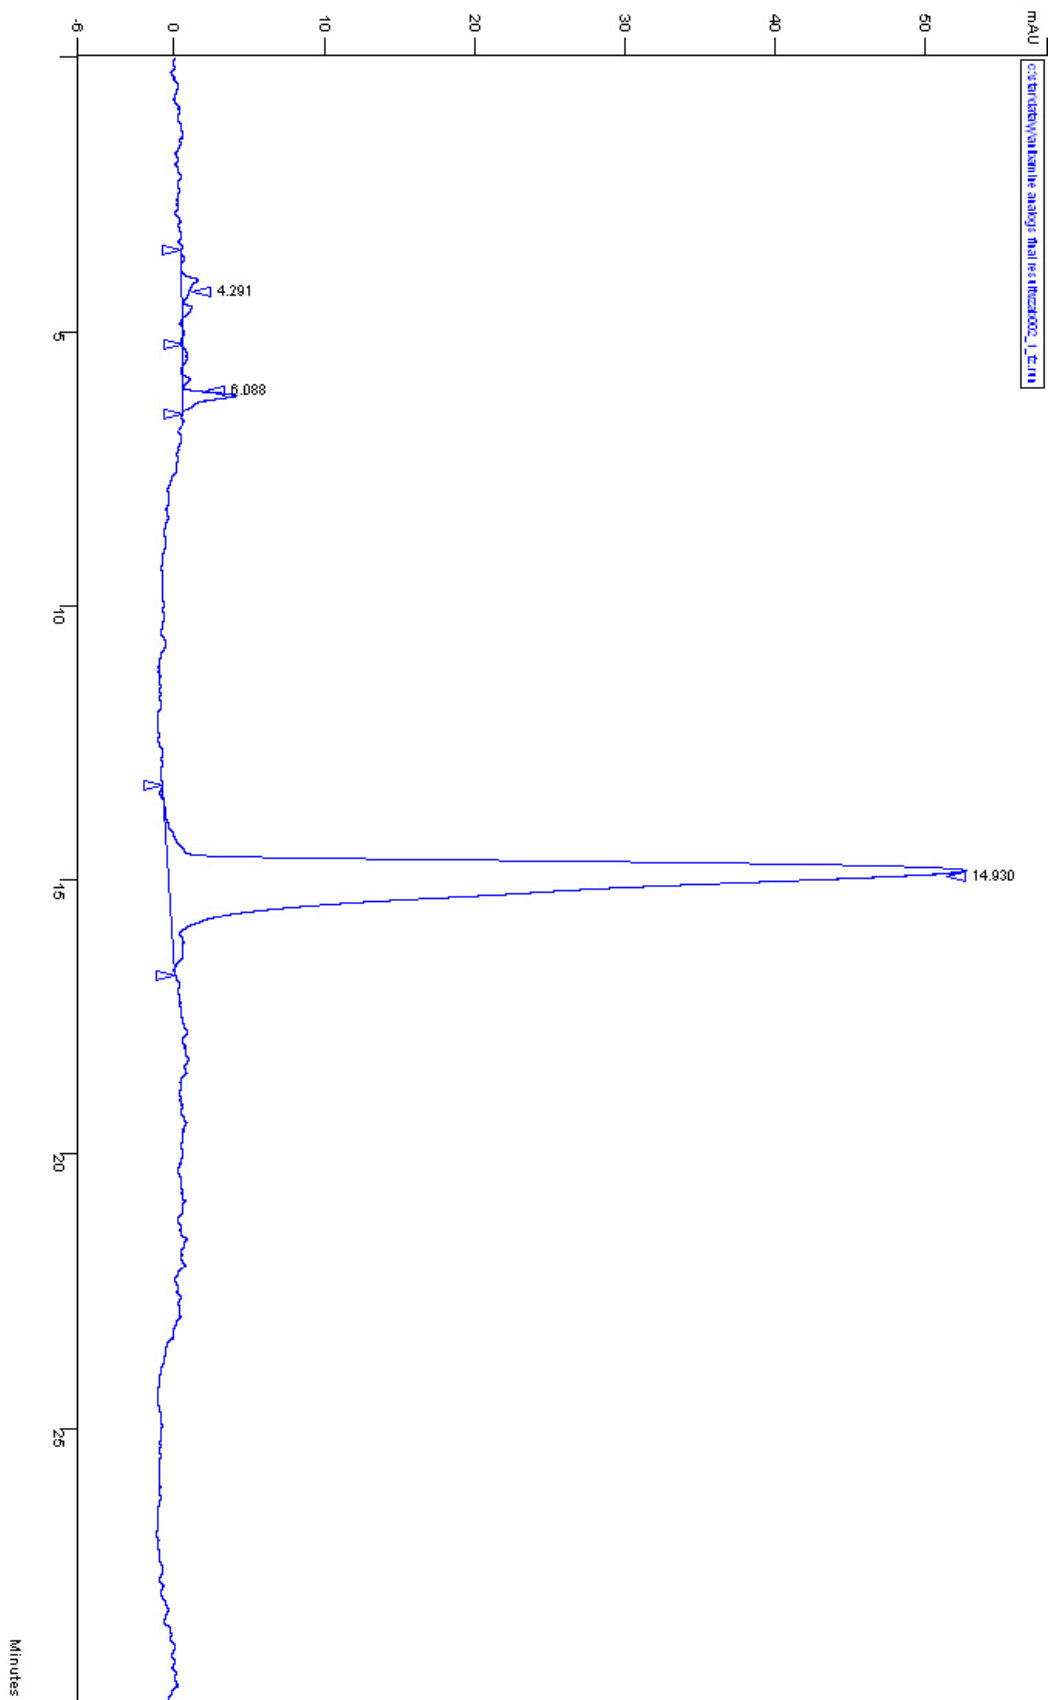

vzab046-1

Title : VZAB046  
Run File : c:\star\data\yy\anibamine analogs final  
result\vzab013\_027-029\_040-047\vzab046.run  
Method File : c:\star\data\yy\anibamine analogs final result\vzab046-1.mth  
Sample ID : Manual Sample

Injection Date: 2011-3-2 13:56 Calculation Date: 2011-3-2 15:16

Operator : Yan Zhang Group Detector Type: 0325  
Workstation: D9288P71 Bus Address : 44  
Instrument : Varian Star #1 Sample Rate : 20.00 Hz  
Channel : 1 = 254 nm Run Time : 30.000 min

\*\* LC Workstation Version 6.41 \*\* 03046-67D0-AE7-0264 \*\*

Run Mode : Analysis  
Peak Measurement: Peak Area  
Calculation Type: Percent

| Peak No. | Peak Name | Result (%) | Ret. Time (min) | Time Offset (min) | Area (counts) | Sep. Code | Width 1/2 (sec) | Status Codes |
|----------|-----------|------------|-----------------|-------------------|---------------|-----------|-----------------|--------------|
| 1        |           | 0.0705     | 3.716           | 0.000             | 67740         | BV        | 10.7            |              |
| 2        |           | 0.0573     | 3.807           | 0.000             | 55093         | VV        | 0.0             |              |
| 3        |           | 0.1759     | 4.097           | 0.000             | 169084        | VV        | 13.0            |              |
| 4        |           | 0.0807     | 4.513           | 0.000             | 77613         | VV        | 12.5            |              |
| 5        |           | 0.0723     | 4.651           | 0.000             | 69519         | VV        | 0.0             |              |
| 6        |           | 0.0866     | 4.787           | 0.000             | 83230         | VB        | 15.6            |              |
| 7        |           | 0.0622     | 10.510          | 0.000             | 59800         | BV        | 13.9            |              |
| 8        |           | 99.3944    | 11.386          | 0.000             | 95533896      | VB        | 45.2            |              |
| Totals:  |           | 99.9999    |                 | 0.000             | 96115975      |           |                 |              |

Total Unidentified Counts : 96115976 counts

Detected Peaks: 8 Rejected Peaks: 0 Identified Peaks: 0

Multiplier: 1 Divisor: 1 Unidentified Peak Factor: 0

Baseline Offset: 0 microAU LSB: 0.1 microAU

Noise (used): 4 microAU - monitored before this run

Manual injection

\*\*\*\*\*

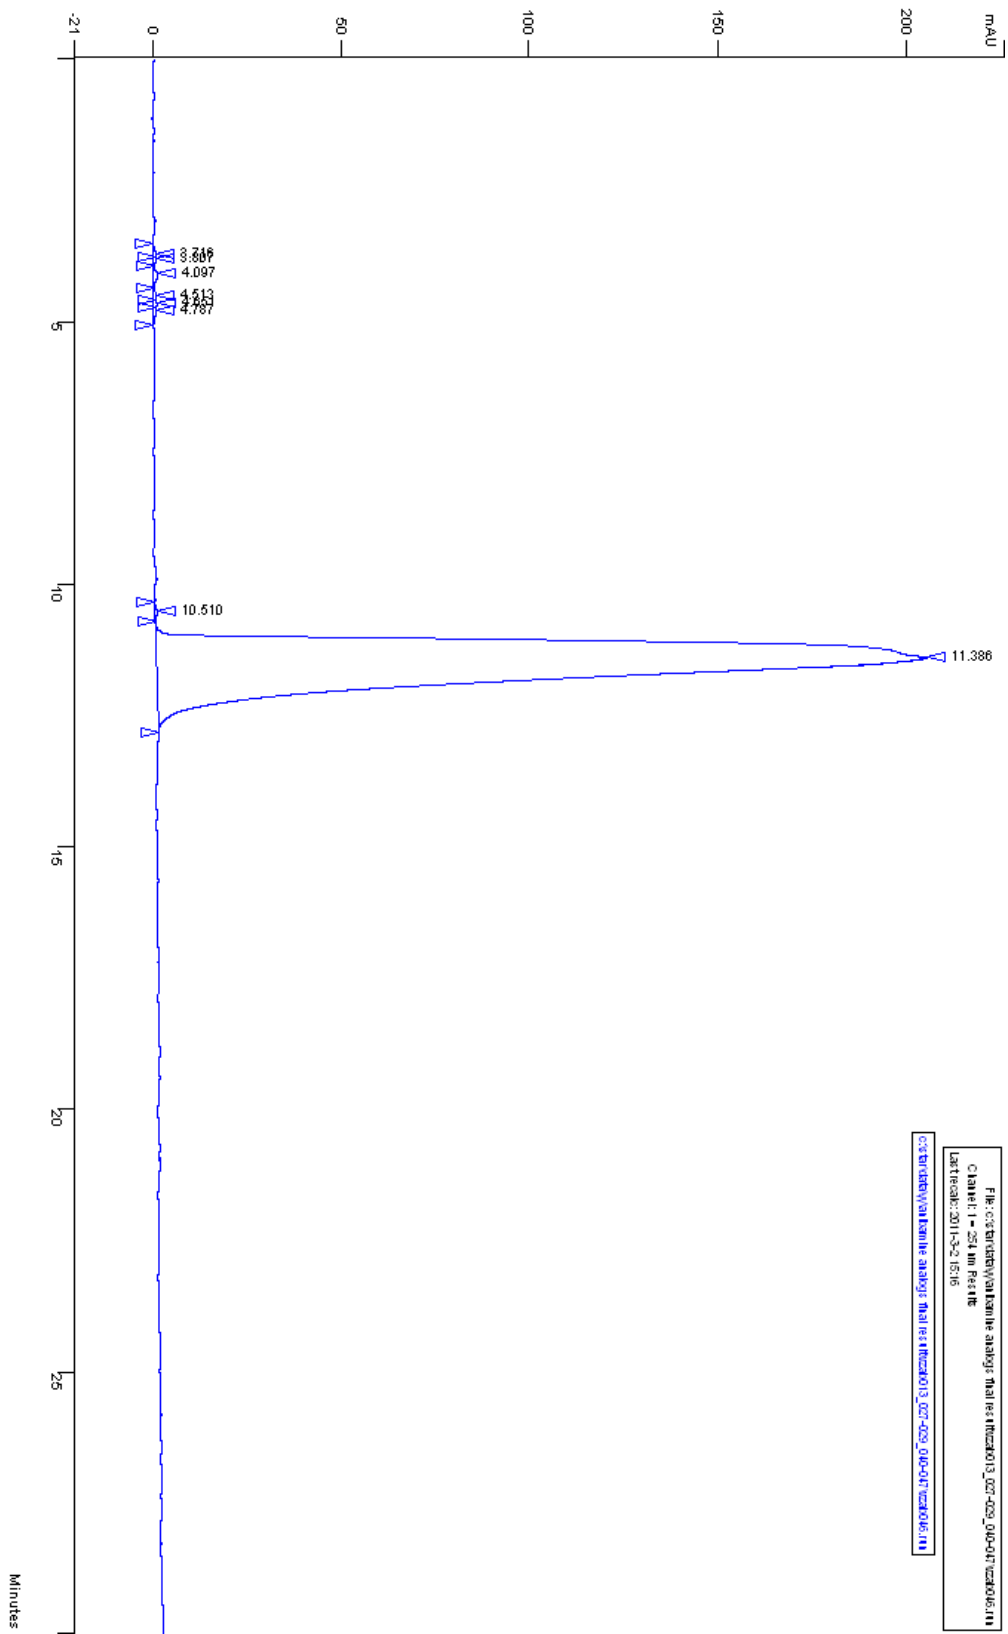

File: c:\tandem\va\kamin\analogs\mal\ref\rt\rt2013\_027-029\_010-017\rt2013\_011  
 Channel: 1 - 254 nm FWHM  
 Last Peak: 2011-02-15 15:16  
 c:\tandem\va\kamin\analogs\mal\ref\rt\rt2013\_027-029\_010-017\rt2013\_011



vzab047-1

Title : VZAB047  
Run File : c:\star\data\yy\anibamine analogs final  
result\vzab013\_027-029\_040-047\vzab047.run  
Method File : c:\star\data\yy\anibamine analogs final result\vzab047-1.mth  
Sample ID : Manual Sample

Injection Date: 2011-3-2 14:28 Calculation Date: 2011-3-2 15:19

Operator : Yan Zhang Group Detector Type: 0325  
Workstation: D9288P71 Bus Address : 44  
Instrument : Varian Star #1 Sample Rate : 20.00 Hz  
Channel : 1 = 254 nm Run Time : 30.000 min

\*\* LC Workstation Version 6.41 \*\* 03046-67D0-AE7-0264 \*\*

Run Mode : Analysis  
Peak Measurement: Peak Area  
Calculation Type: Percent

| Peak No. | Peak Name | Result (%) | Ret. Time (min) | Time Offset (min) | Area (counts) | Sep. Code | Width 1/2 (sec) | Status Codes |
|----------|-----------|------------|-----------------|-------------------|---------------|-----------|-----------------|--------------|
| 1        |           | 1.7222     | 11.404          | 0.000             | 277011        | BV        | 11.8            |              |
| 2        |           | 97.7347    | 11.770          | 0.000             | 15720707      | VB        | 32.4            |              |
| 3        |           | 0.5431     | 13.618          | 0.000             | 87366         | BB        | 12.9            |              |
| Totals:  |           | 100.0000   |                 | 0.000             | 16085084      |           |                 |              |

Total Unidentified Counts : 16085084 counts

Detected Peaks: 3 Rejected Peaks: 0 Identified Peaks: 0

Multiplier: 1 Divisor: 1 Unidentified Peak Factor: 0

Baseline Offset: 0 microAU LSB: 0.1 microAU

Noise (used): 1 microAU - monitored before this run

Manual injection

\*\*\*\*\*



|             |       |                                     |
|-------------|-------|-------------------------------------|
| Compound 5  | ----- | Experimnetal code <b>FZ-I-55</b>    |
| Compound 6  | ----- | Experimnetal code <b>FZ-I-44</b>    |
| Compound 7  | ----- | Experimnetal code <b>FZ-II-23</b>   |
| Compound 8  | ----- | Experimnetal code <b>FZ-IV-34</b>   |
| Compound 9  | ----- | Experimnetal code <b>FZ-I-26</b>    |
| Compound 10 | ----- | Experimnetal code <b>FZ-IV-47</b>   |
| Compound 11 | ----- | Experimnetal code <b>FZ-II-33</b>   |
| Compound 12 | ----- | Experimnetal code <b>FZ-I-83</b>    |
| Compound 13 | ----- | Experimnetal code <b>FZ-II-70</b>   |
| Compound 14 | ----- | Experimnetal code <b>FZ-II-72</b>   |
| Compound 1  | ----- | Experimnetal code <b>FZ-II-74</b>   |
| Compound 15 | ----- | Experimnetal code <b>FZ-I-32</b>    |
| Compound 16 | ----- | Experimnetal code <b>FZ-II-67</b>   |
| Compound 17 | ----- | Experimnetal code <b>FZ-II-68</b>   |
| Compound 2  | ----- | Experimnetal code <b>FZ-II-21</b>   |
| Compound 18 | ----- | Experimnetal code <b>FZ-IV-29-1</b> |
| Compound 19 | ----- | Experimnetal code <b>FZ-IV-29-2</b> |
| Compound 20 | ----- | Experimnetal code <b>FZ-V-03</b>    |
| Compound 21 | ----- | Experimnetal code <b>FZ-V-04</b>    |
| Compound 3  | ----- | Experimnetal code <b>FZ-V-05</b>    |
| Compound 22 | ----- | Experimnetal code <b>FZ-V-06</b>    |
| Compound 23 | ----- | Experimnetal code <b>FZ-V-07</b>    |
| Compound 4  | ----- | Experimnetal code <b>FZ-V-08</b>    |

Thu Apr 14 17:49:37 2011 (G

FZ-I-55

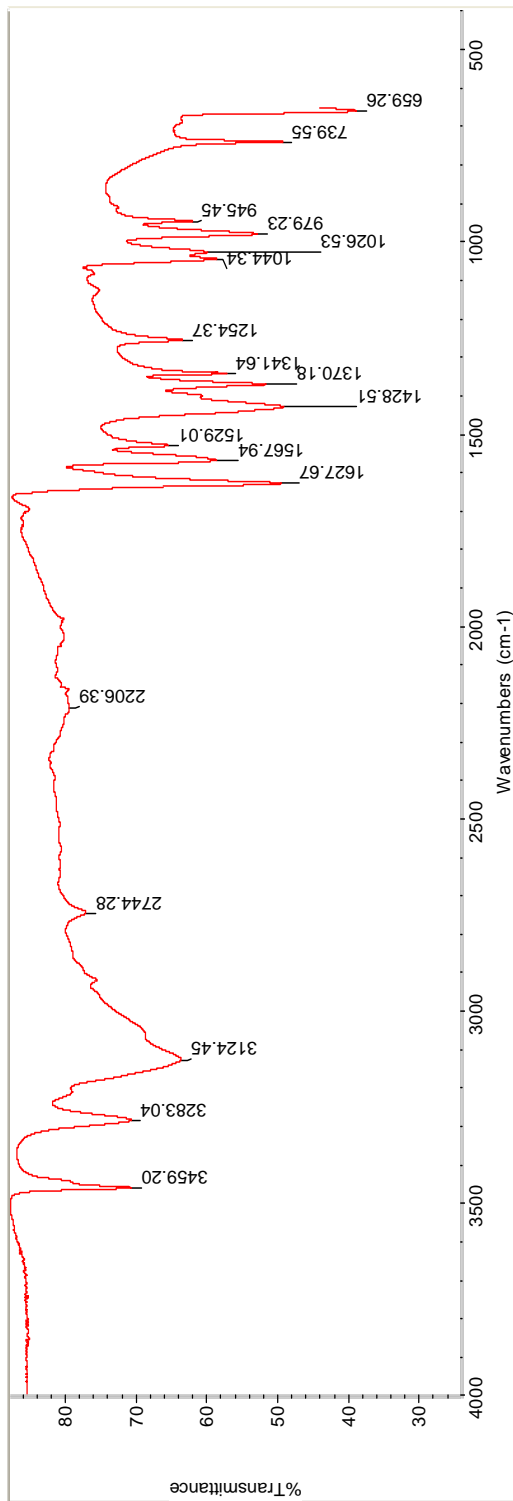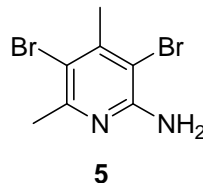

Thu Apr 14 17:49:31 2011 (GMT-04:00)

Number of sample scans: 16  
Number of background scans: 16  
Resolution: 4.000  
Sample gain: 2.0  
Optical velocity: 0.4747  
Aperture: 80.00

Find Peaks:  
Spectrum: FZ-I-55  
Region: 4000.00 400.00  
Absolute threshold: 83.435  
Sensitivity: 50  
Peak list:  
Position: 659.26 Intensity: Intensive  
Position: 739.55 Intensity: Intensive  
Position: 945.45 Intensity: Intensive  
Position: 979.23 Intensity: Intensive  
Position: 1026.53 Intensity: Intensive  
Position: 1044.34 Intensity: Intensive  
Position: 1254.37 Intensity: Intensive

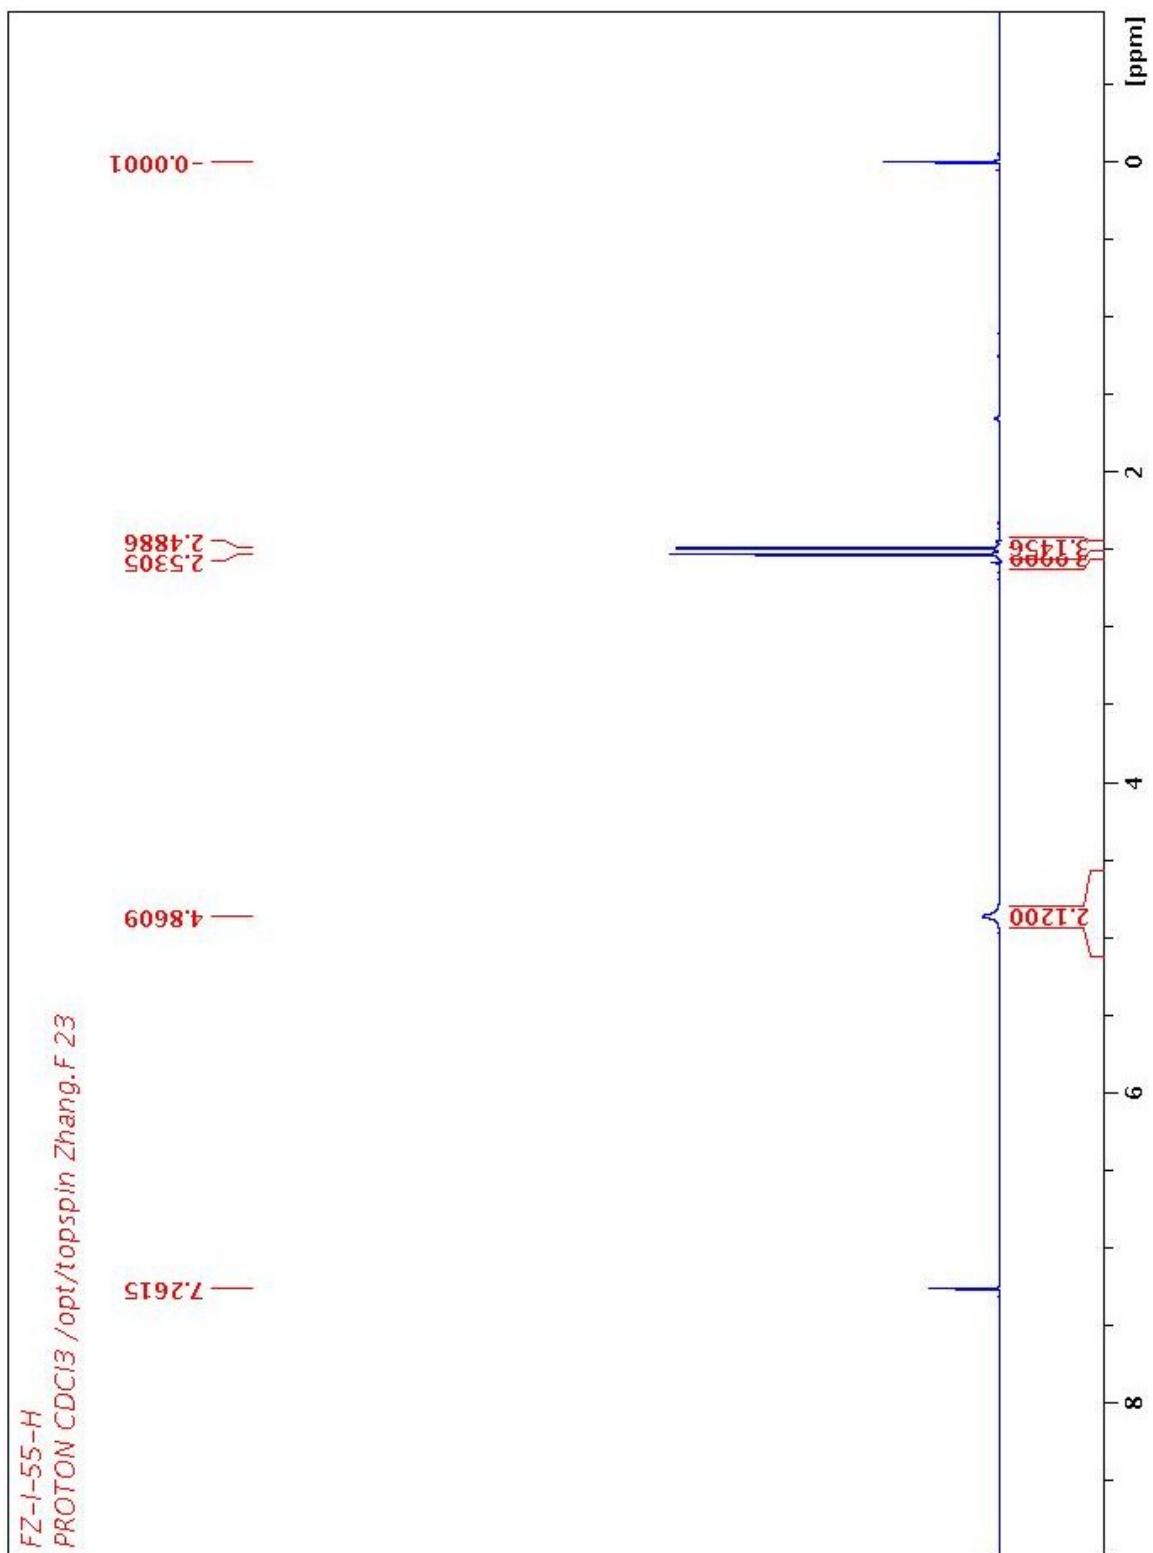

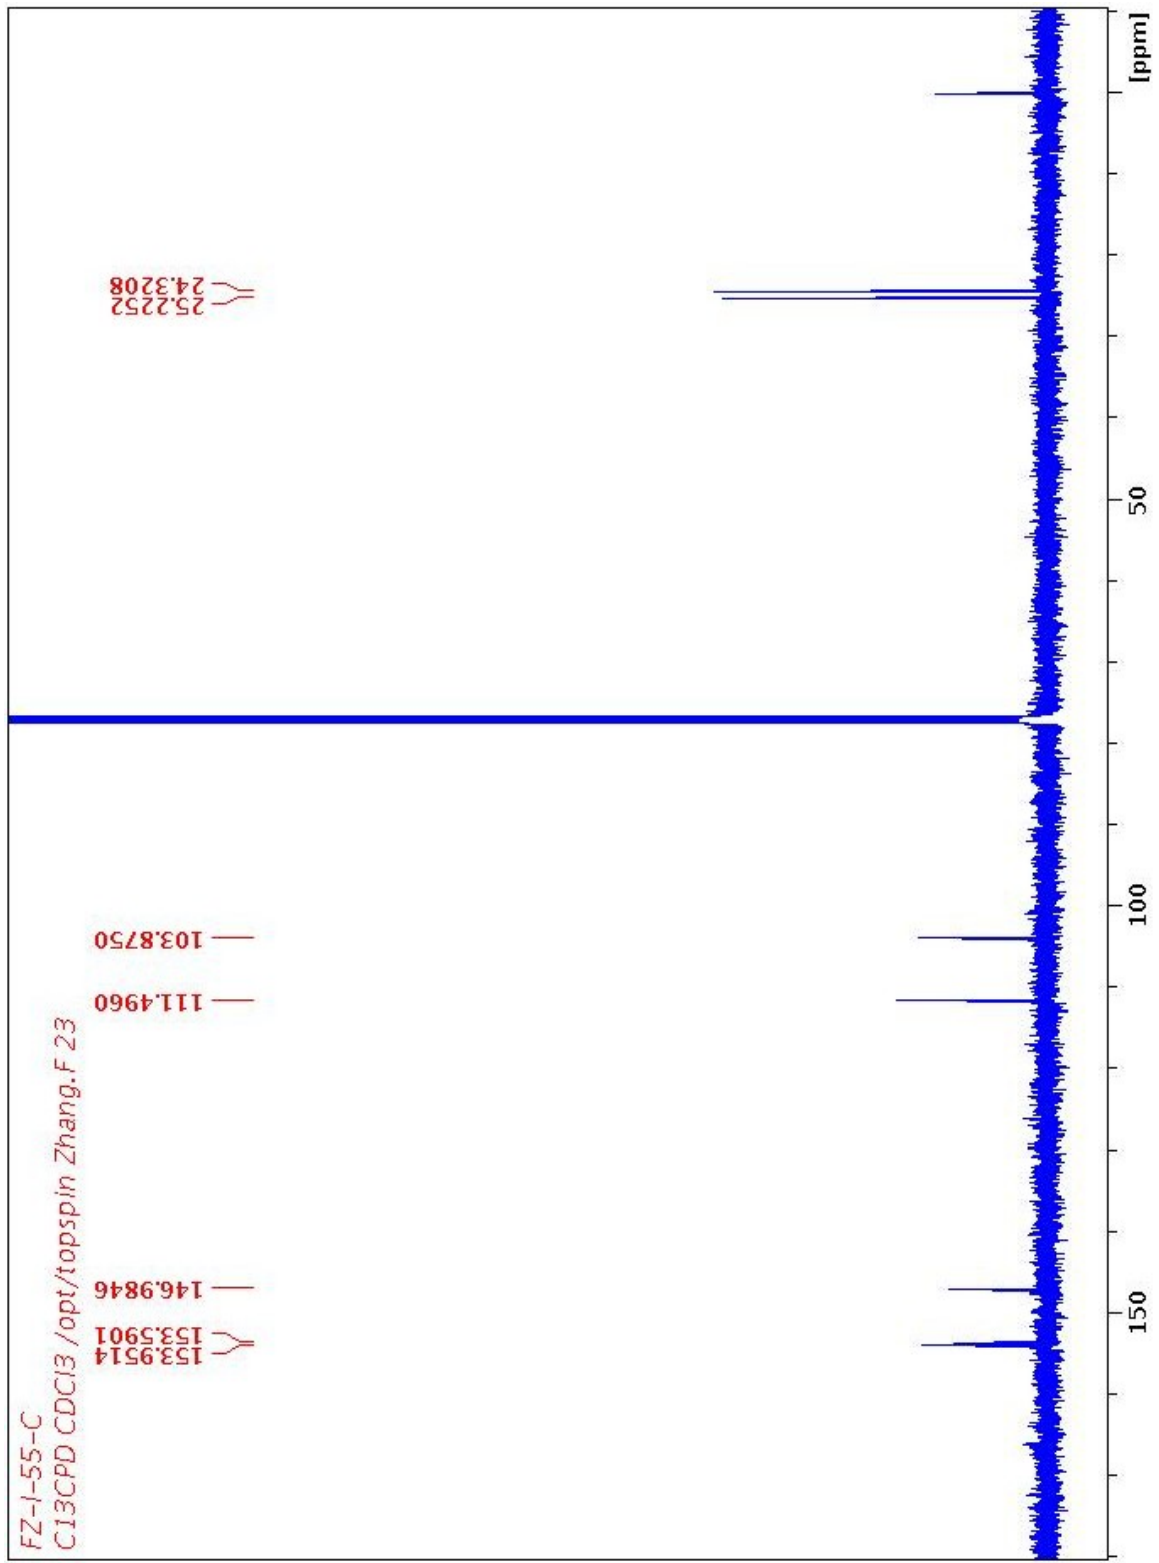

Mon Apr 18 09:14:47 2011 (C)

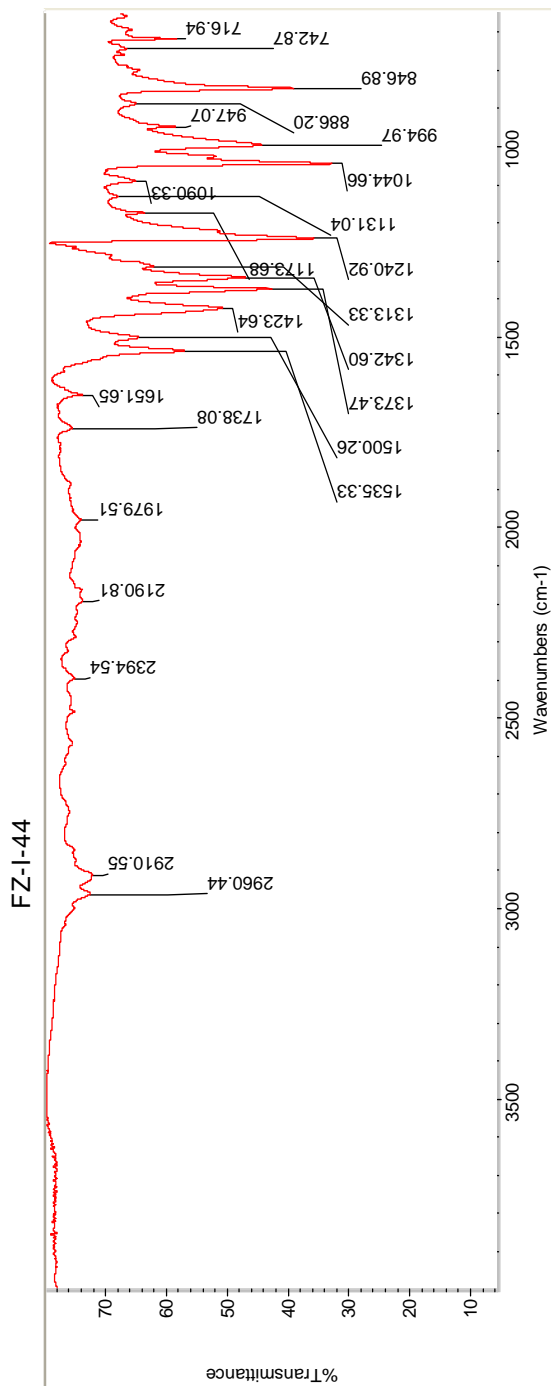

Mon Apr 18 09:14:31 2011 (GMT-04:00)

Find Peaks:

|                     |                    |
|---------------------|--------------------|
| Spectrum:           | FZ-I-44            |
| Region:             | 4000.00 400.00     |
| Absolute threshold: | 75.745             |
| Sensitivity:        | 50                 |
| Peak list:          |                    |
| Position:           | 716.94 Intensity:  |
| Position:           | 742.87 Intensity:  |
| Position:           | 846.89 Intensity:  |
| Position:           | 886.20 Intensity:  |
| Position:           | 947.07 Intensity:  |
| Position:           | 994.97 Intensity:  |
| Position:           | 1044.66 Intensity: |

Number of sample scans: 16  
Number of background scans: 16  
Resolution: 4.000  
Sample gain: 2.0  
Optical velocity: 0.4747  
Aperture: 80.00

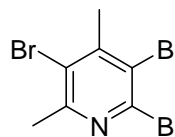

9

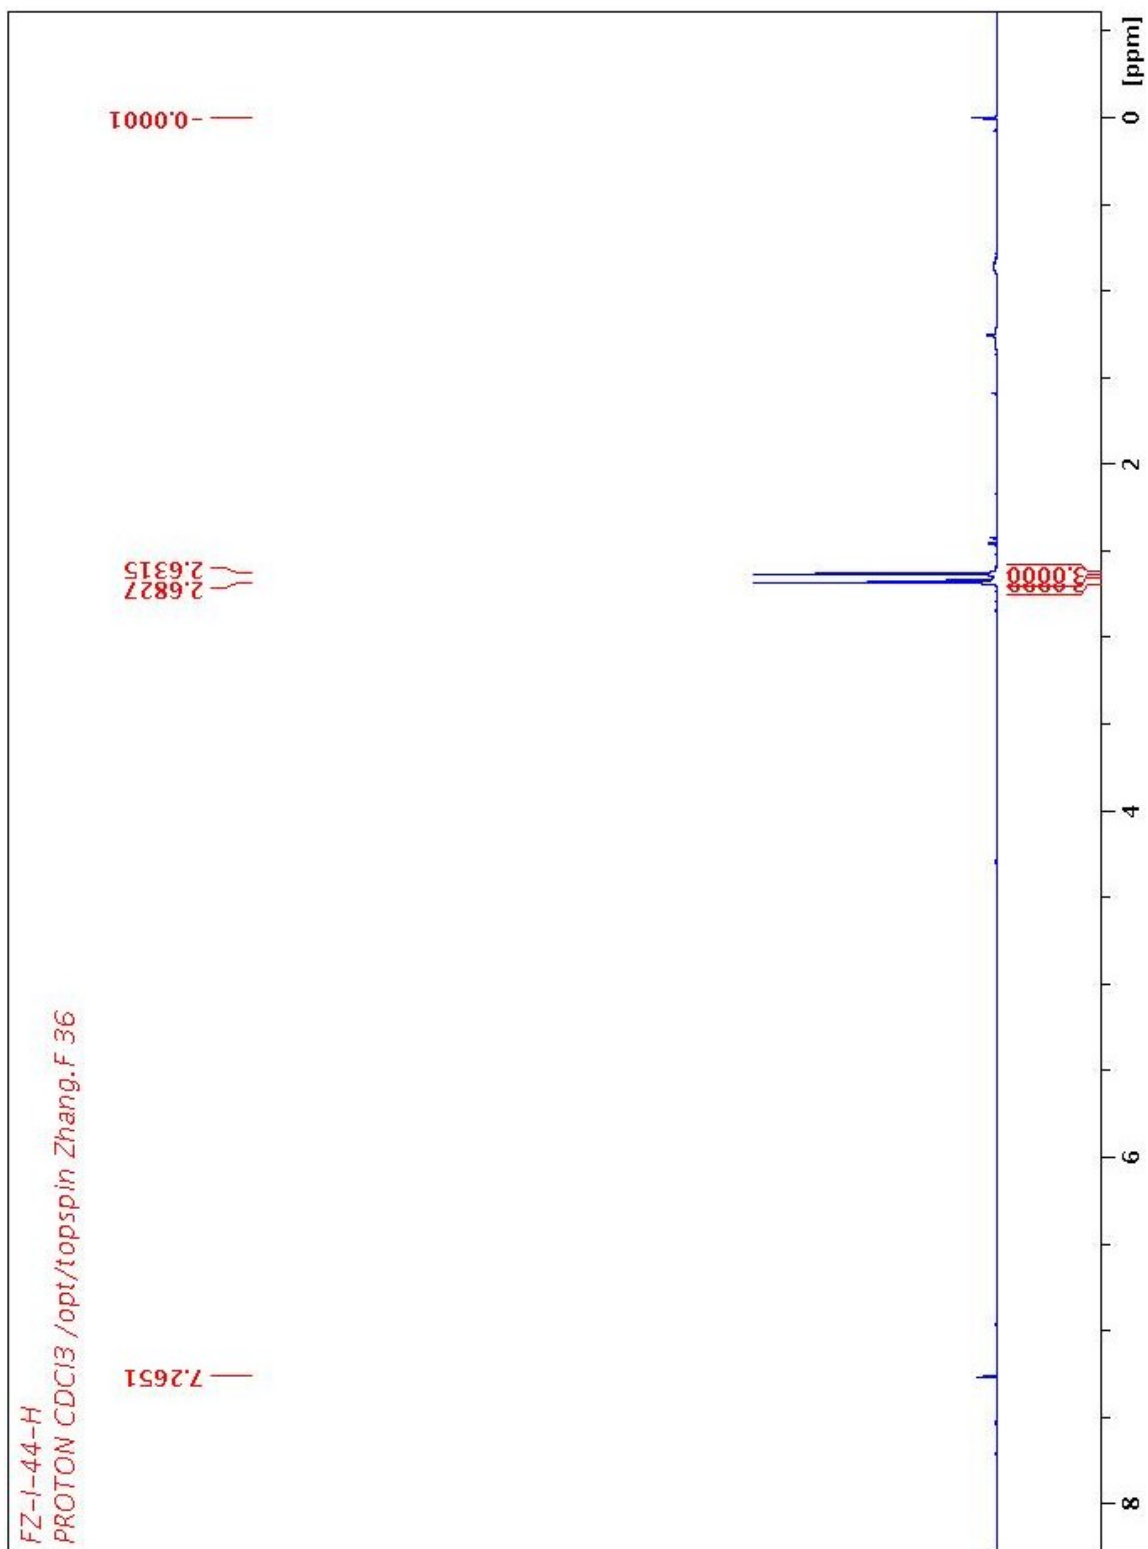



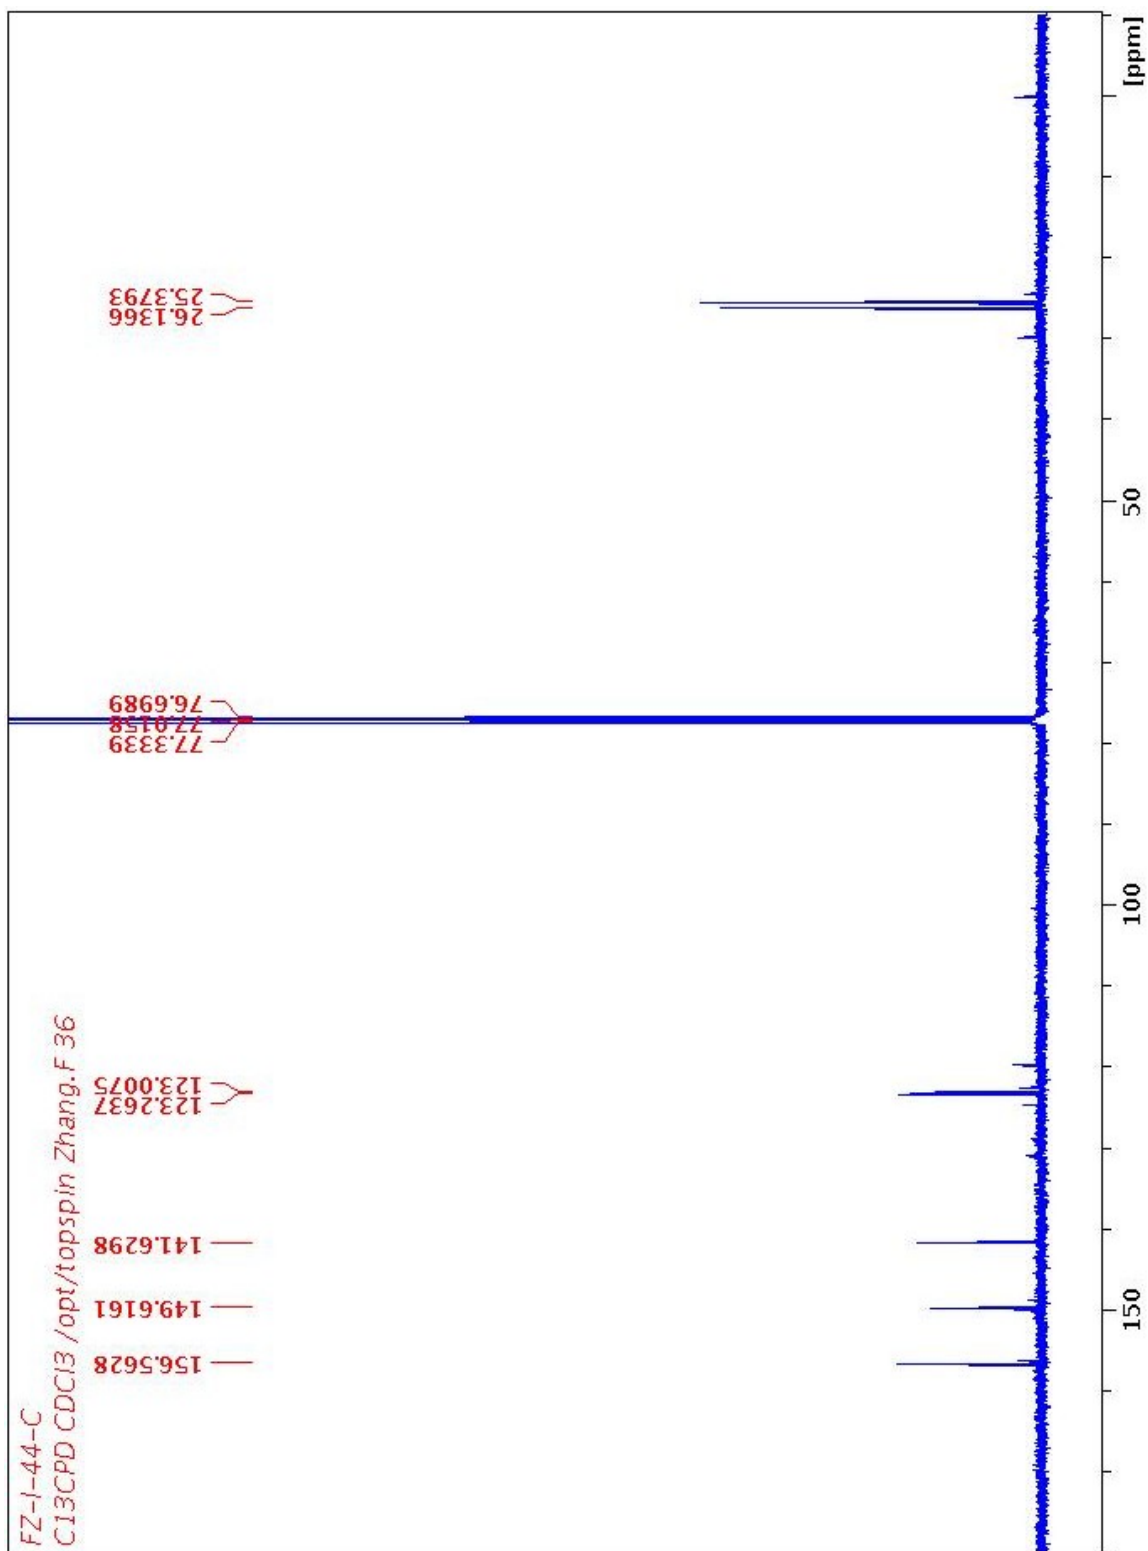

Thu Apr 14 17:57:47 2011 (G

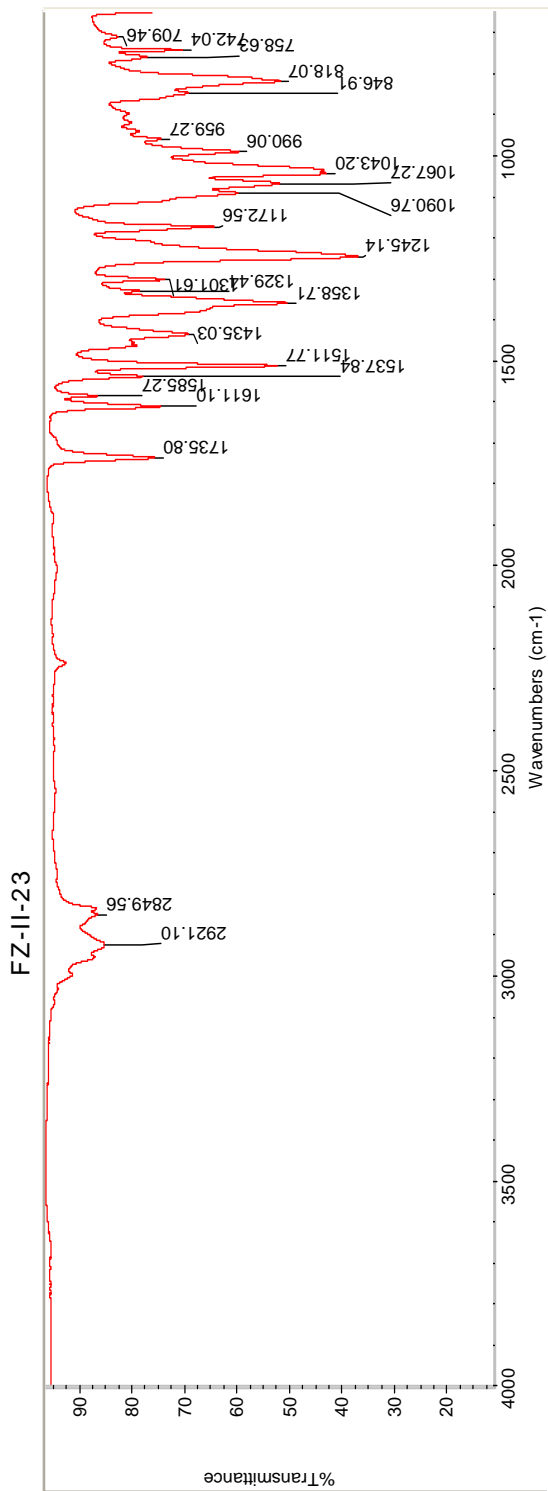

Thu Apr 14 17:57:42 2011 (GMT-04:00)

FIND PEAKS:

|                     |          |            |
|---------------------|----------|------------|
| Spectrum:           | FZ-II-23 | Intensity: |
| Region:             | 4000.12  | 649.89     |
| Absolute threshold: | 91.560   |            |
| Sensitivity:        | 50       |            |
| Peak list:          |          |            |
| Position:           | 709.46   | Intensity: |
| Position:           | 742.04   | Intensity: |
| Position:           | 758.63   | Intensity: |
| Position:           | 818.07   | Intensity: |
| Position:           | 846.91   | Intensity: |
| Position:           | 959.27   | Intensity: |
| Position:           | 990.06   | Intensity: |

Number of sample scans: 16  
Number of background scans: 16  
Resolution: 4.000  
Sample gain: 1.0  
Optical velocity: 0.4747  
Aperture: 80.00

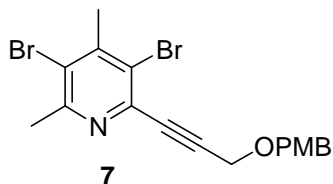

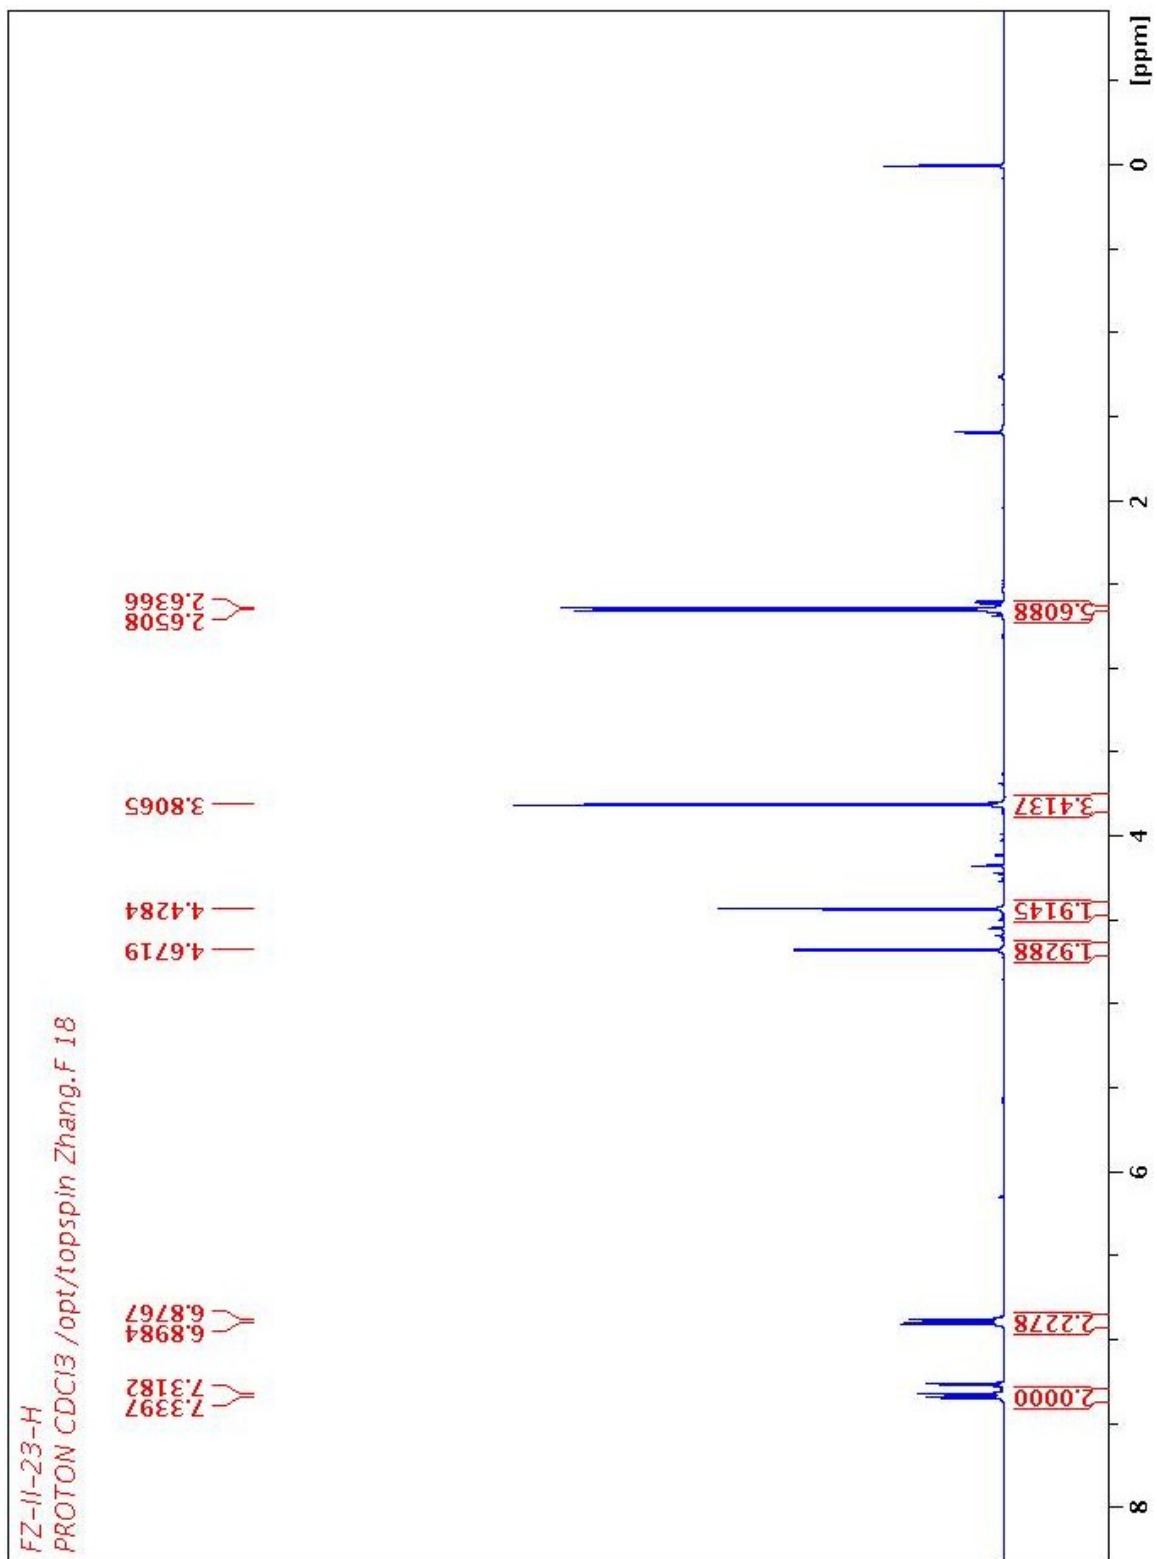

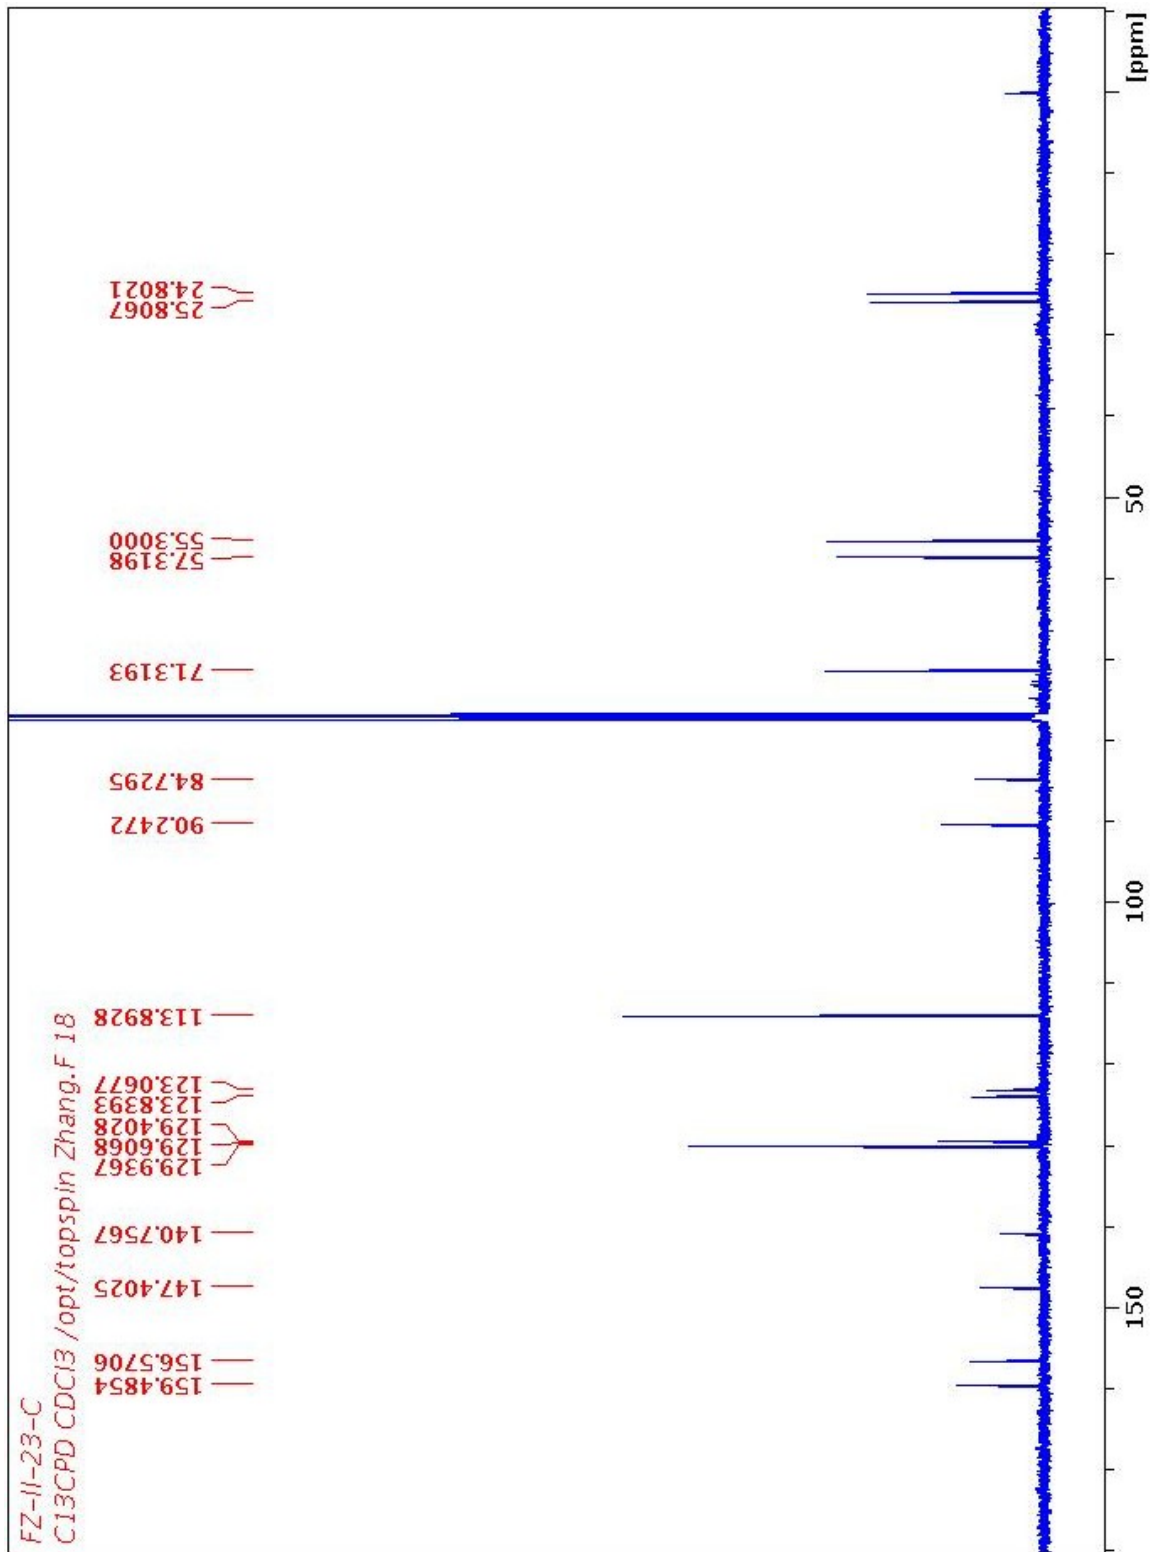

r110809r01 #4-49 RT: 0.04-0.66 AV: 46 NL: 3.96E7  
T: FTMS + p NSI Full ms [200.00-2000.00]

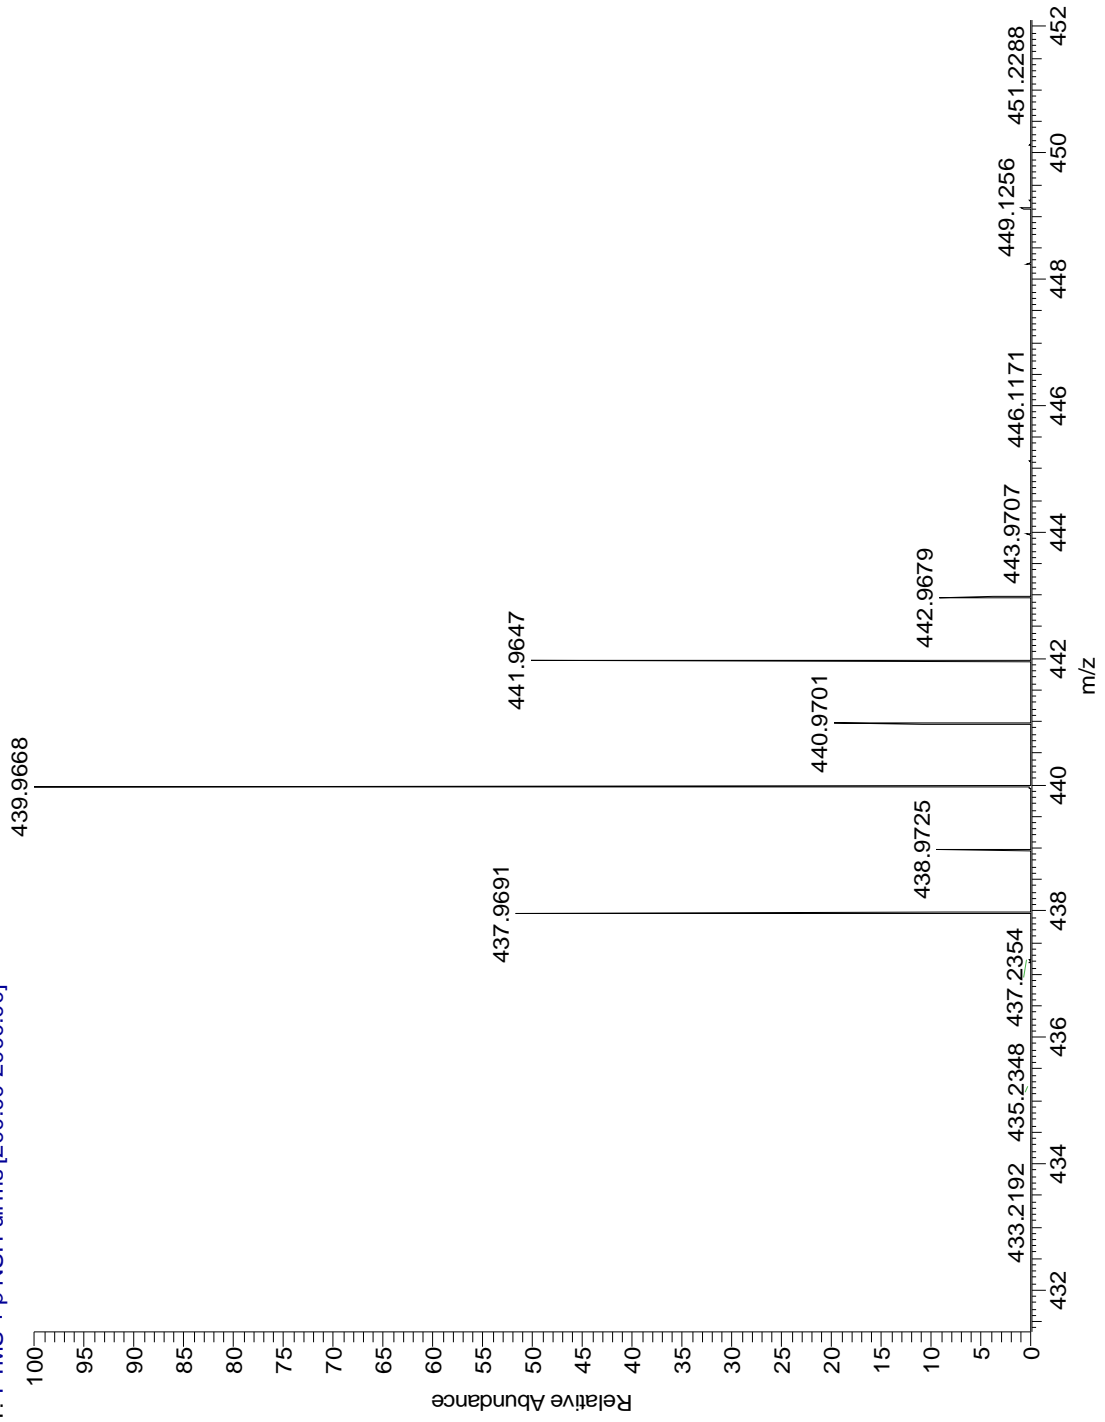

Thu Apr 14 17:55:52 2011 (G

FZ-IV-34

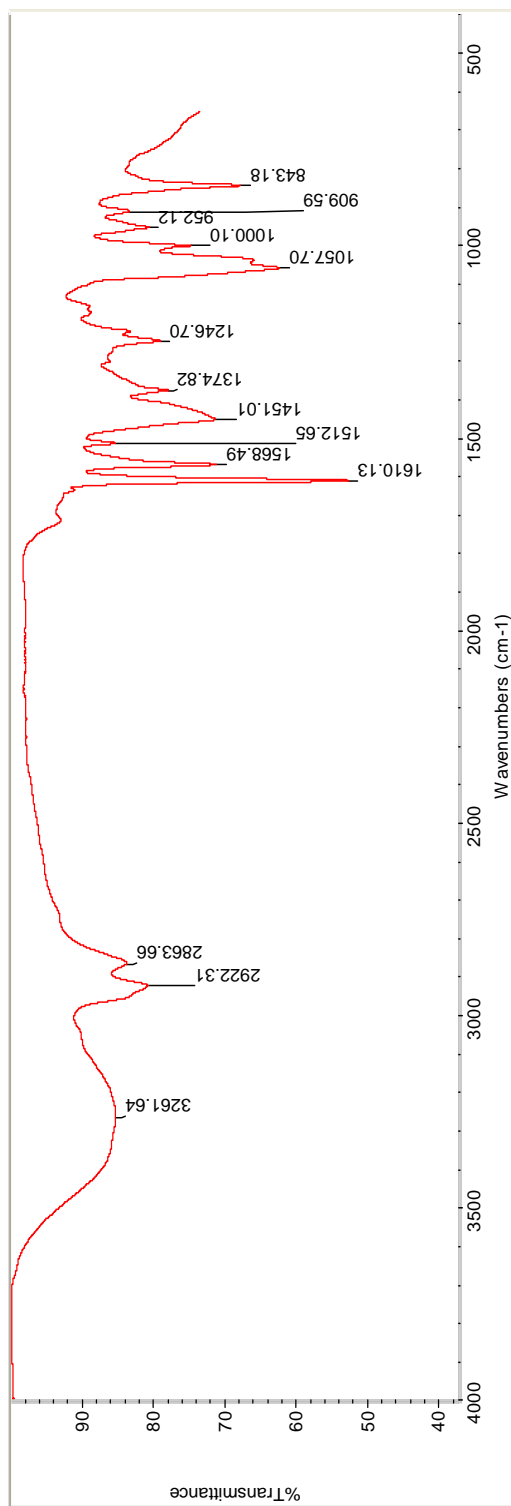

Thu Apr 14 17:55:46 2011 (GMT-04:00)

Number of sample scans: 16  
Number of background scans: 16  
Resolution: 4.000  
Sample gain: 2.0  
Optical velocity: 0.4747  
Aperture: 80.00

FIND PEAKS:

Spectrum: FZ-IV-34  
Region: 4000.00 400.00  
Absolute threshold: 95.750  
Sensitivity: 50

| Peak list: | Position: | Intensity: |
|------------|-----------|------------|
|            | 843.18    | Intensity: |
|            | 909.59    | Intensity: |
|            | 952.12    | Intensity: |
|            | 1000.10   | Intensity: |
|            | 1057.70   | Intensity: |
|            | 1246.70   | Intensity: |
|            | 1374.82   | Intensity: |

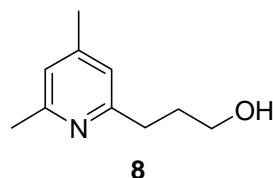

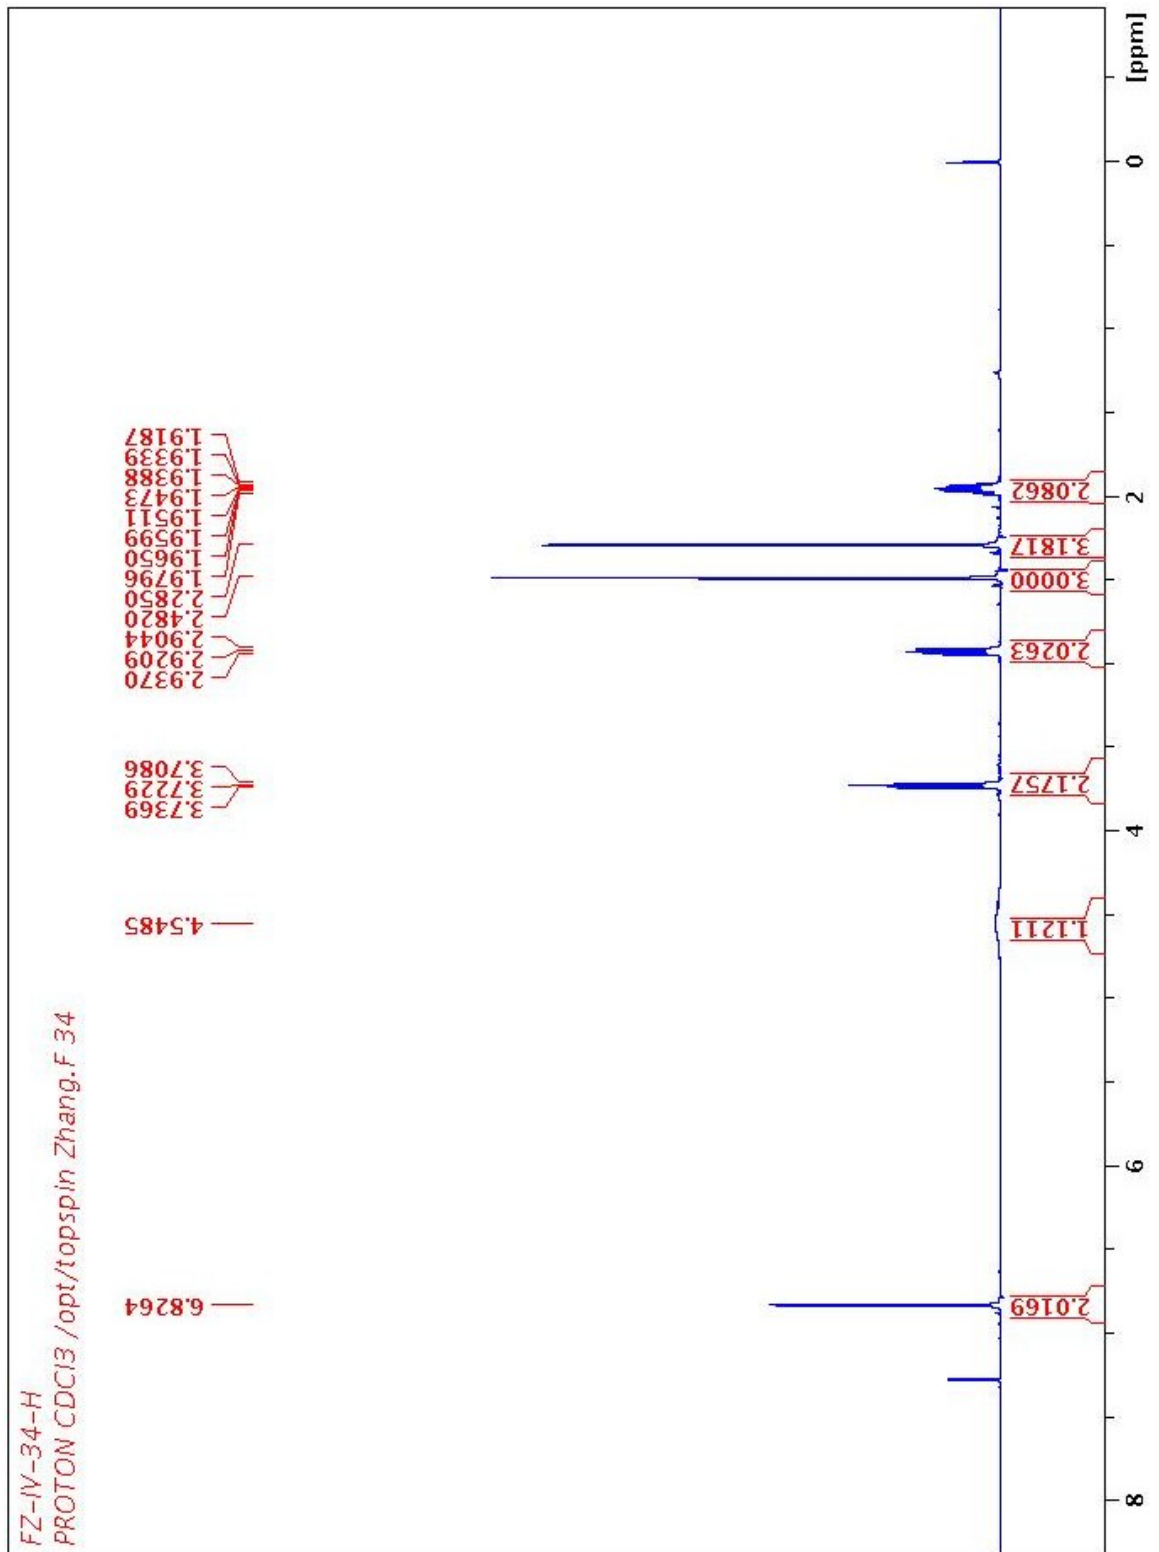

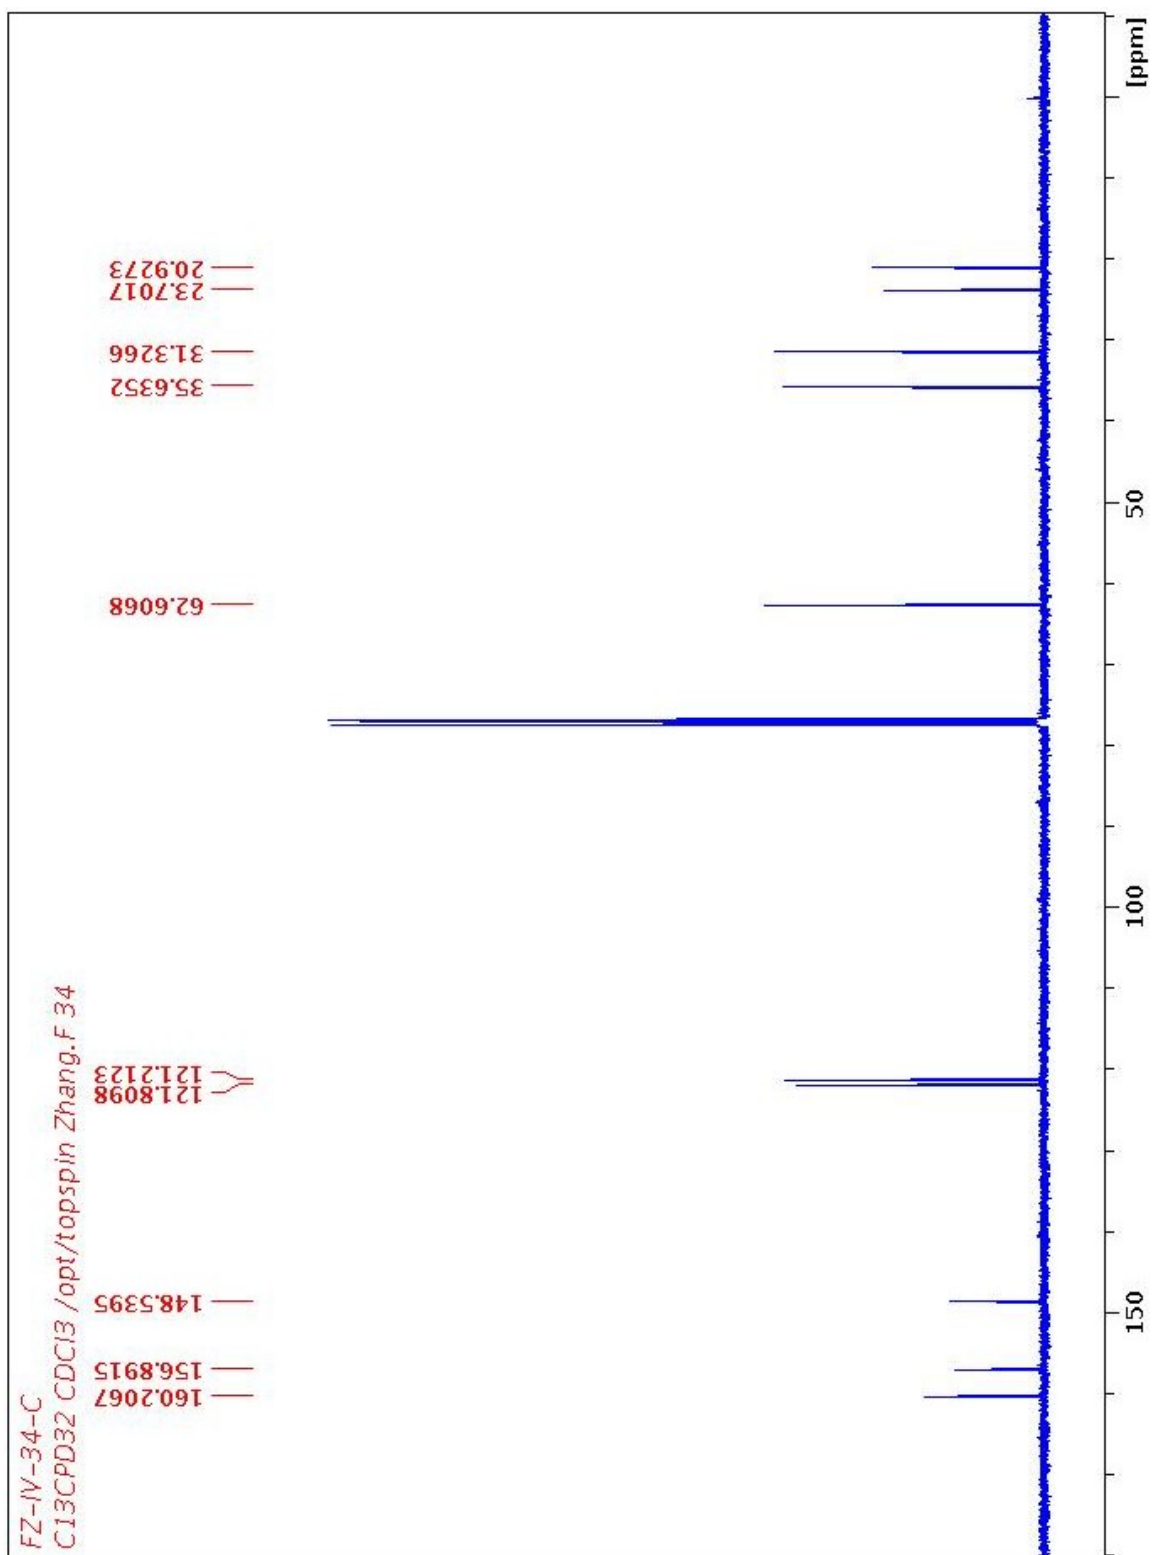



r110809r02 #1-49 RT: 0.00-0.67 AV: 49 NL: 1.26E9  
T: FTMS + p NSIFull ms [100.00-1500.00]

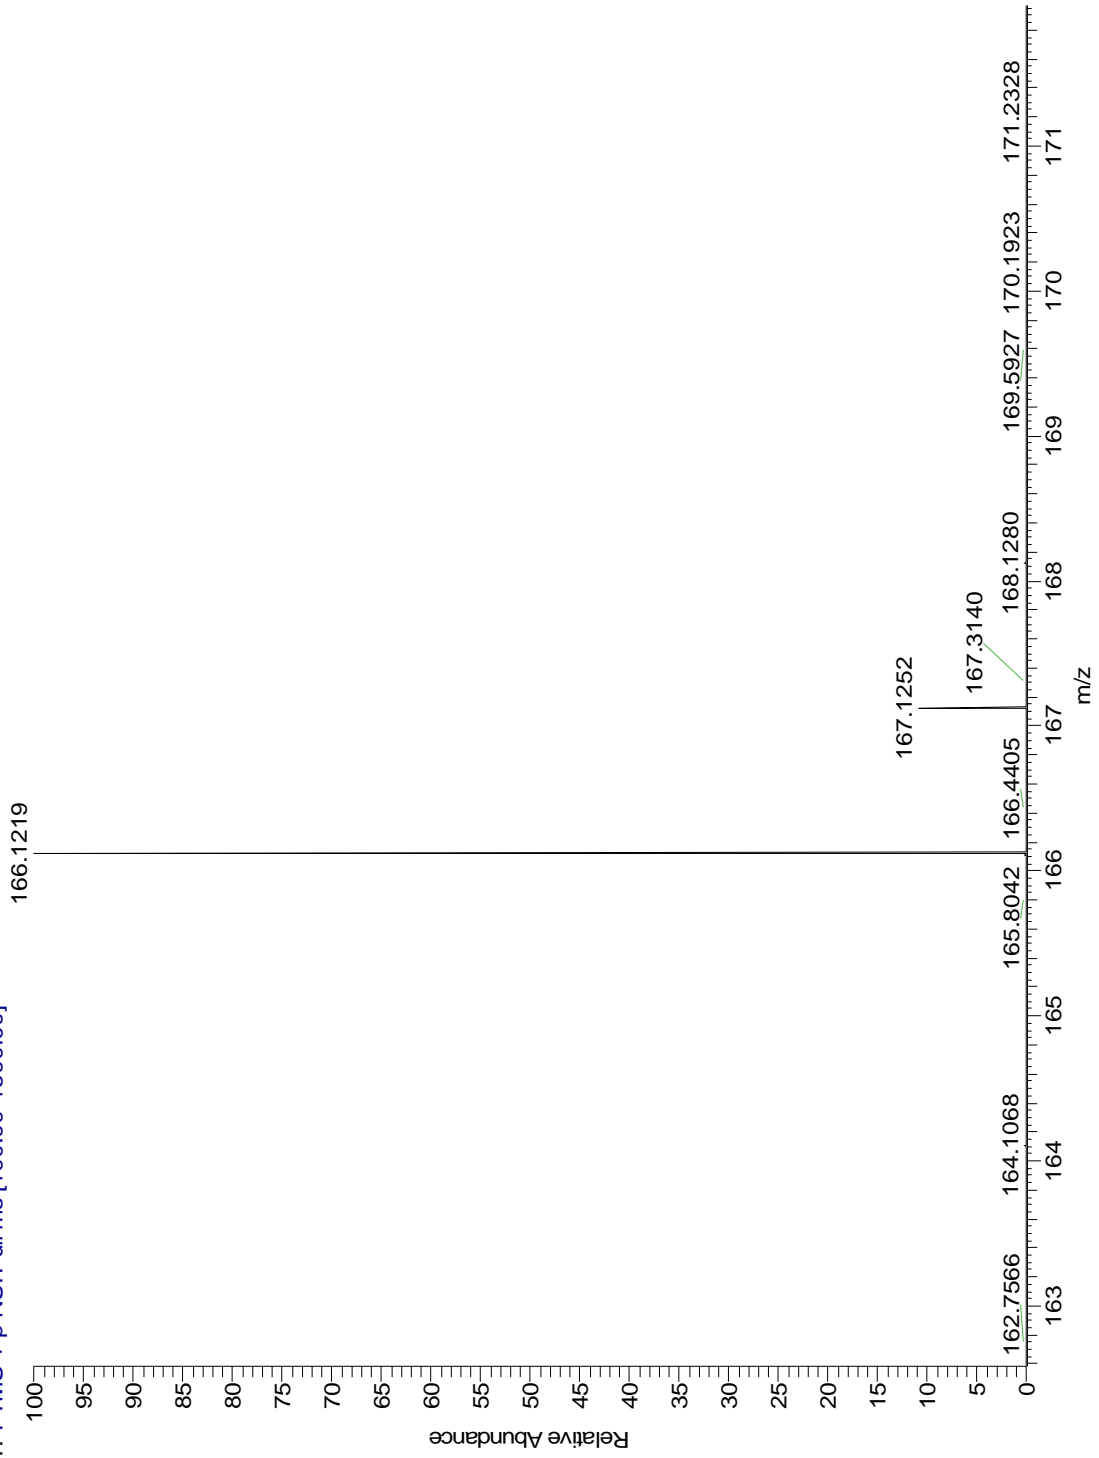

Thu Apr 14 17:46:47 2011 (G

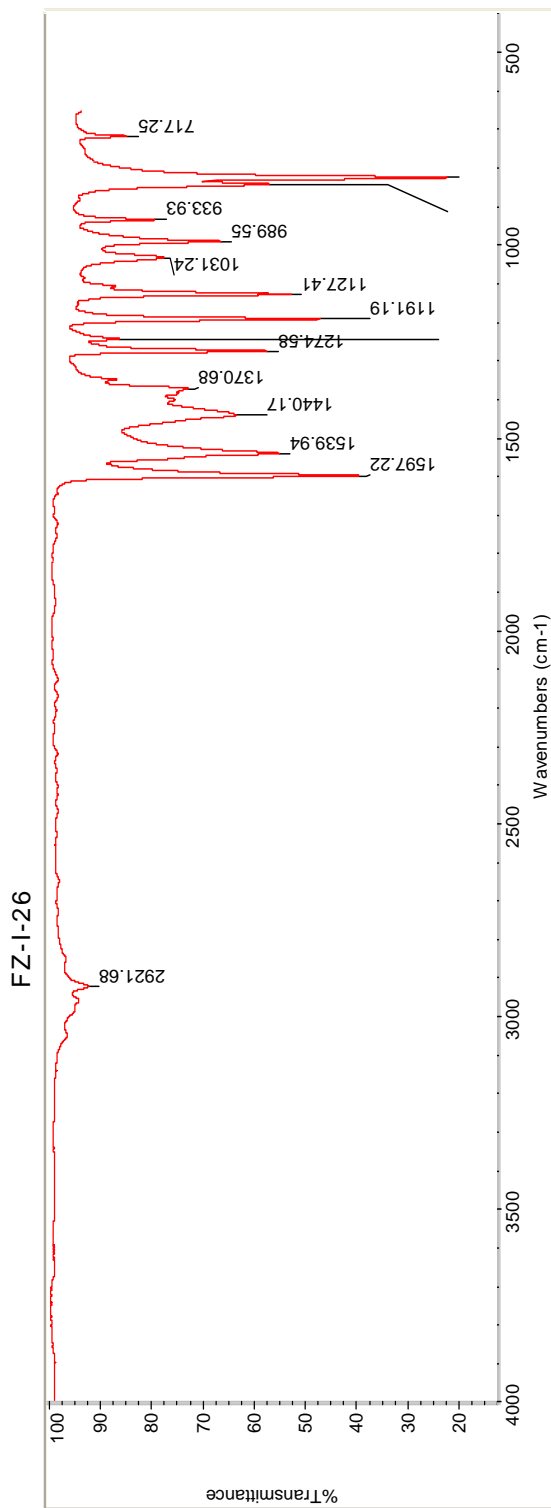

Thu Apr 14 17:46:46 2011 (GMT-04:00)

Number of sample scans: 16  
Number of background scans: 16  
Resolution: 4.000  
Sample gain: 2.0  
Optical velocity: 0.4747  
Aperture: 80.00

FIND PEAKS:

| Region  | Position | Intensity |
|---------|----------|-----------|
| FZ-I-26 | 717.25   | Intensiv  |
| 4000.00 | 824.69   | Intensiv  |
| 400.00  | 841.37   | Intensiv  |
| 96.857  | 933.93   | Intensiv  |
| 50      | 989.55   | Intensiv  |
| 50      | 1031.24  | Intensiv  |
| 50      | 1127.41  | Intensiv  |

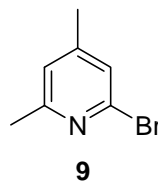

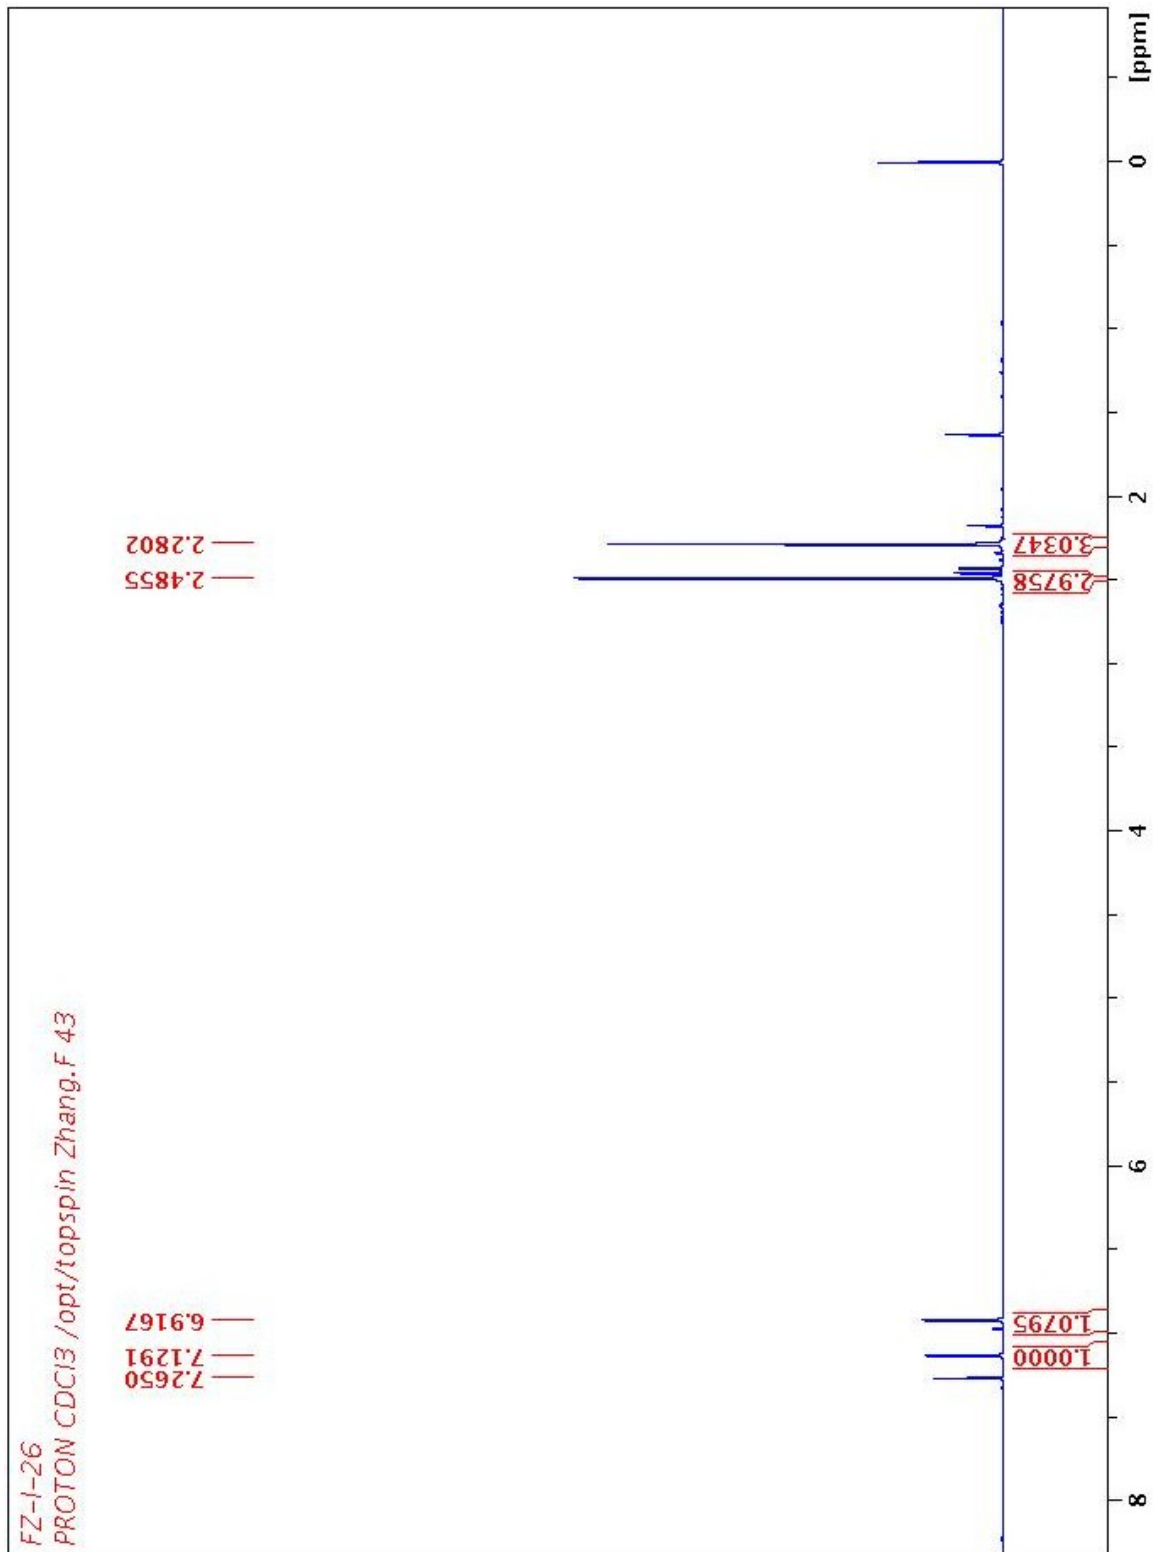



Thu Apr 14 17:55:04 2011 (G)

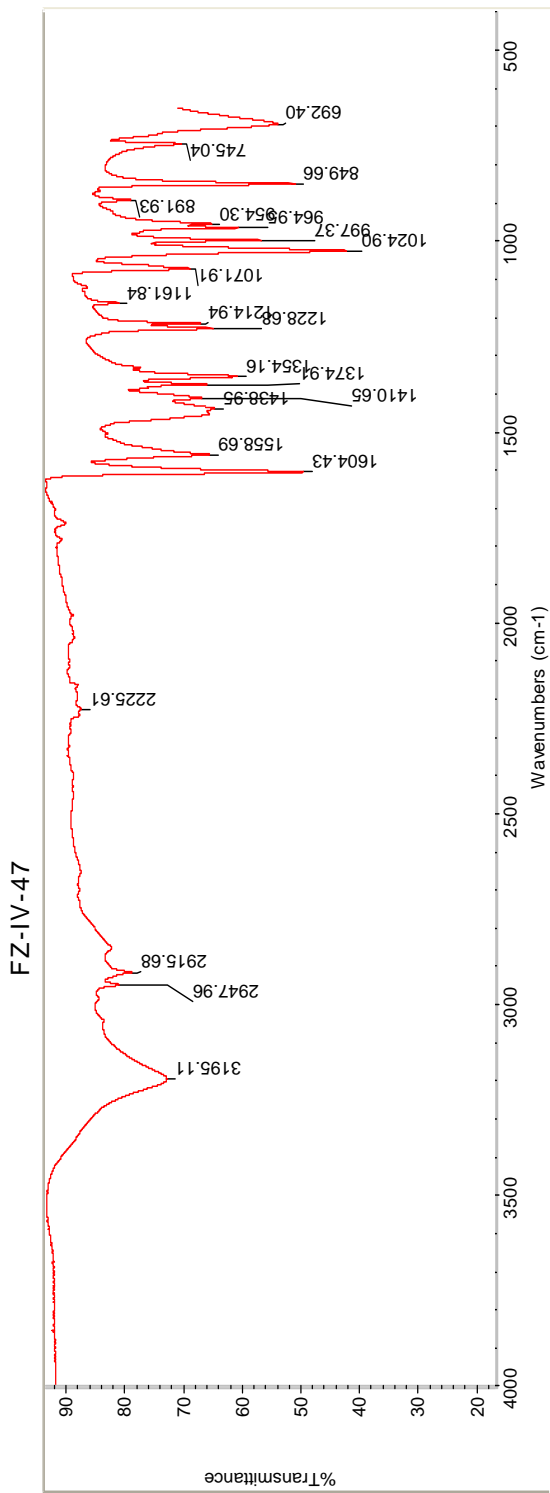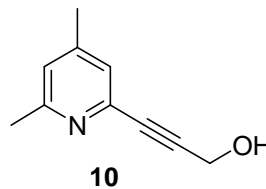

Thu Apr 14 17:55:03 2011 (GMT-04:00)

FIND PEAKS:

|                     |          |            |
|---------------------|----------|------------|
| Spectrum:           | FZ-IV-47 |            |
| Region:             | 4000.00  | 400.00     |
| Absolute threshold: | 89.638   |            |
| Sensitivity:        | 50       |            |
| Peak list:          |          |            |
| Position:           | 692.40   | Intensity: |
| Position:           | 745.04   | Intensity: |
| Position:           | 849.66   | Intensity: |
| Position:           | 891.93   | Intensity: |
| Position:           | 954.30   | Intensity: |
| Position:           | 964.95   | Intensity: |
| Position:           | 997.37   | Intensity: |

Number of sample scans: 16  
Number of background scans: 16  
Resolution: 4.000  
Sample gain: 2.0  
Optical velocity: 0.4747  
Aperture: 80.00

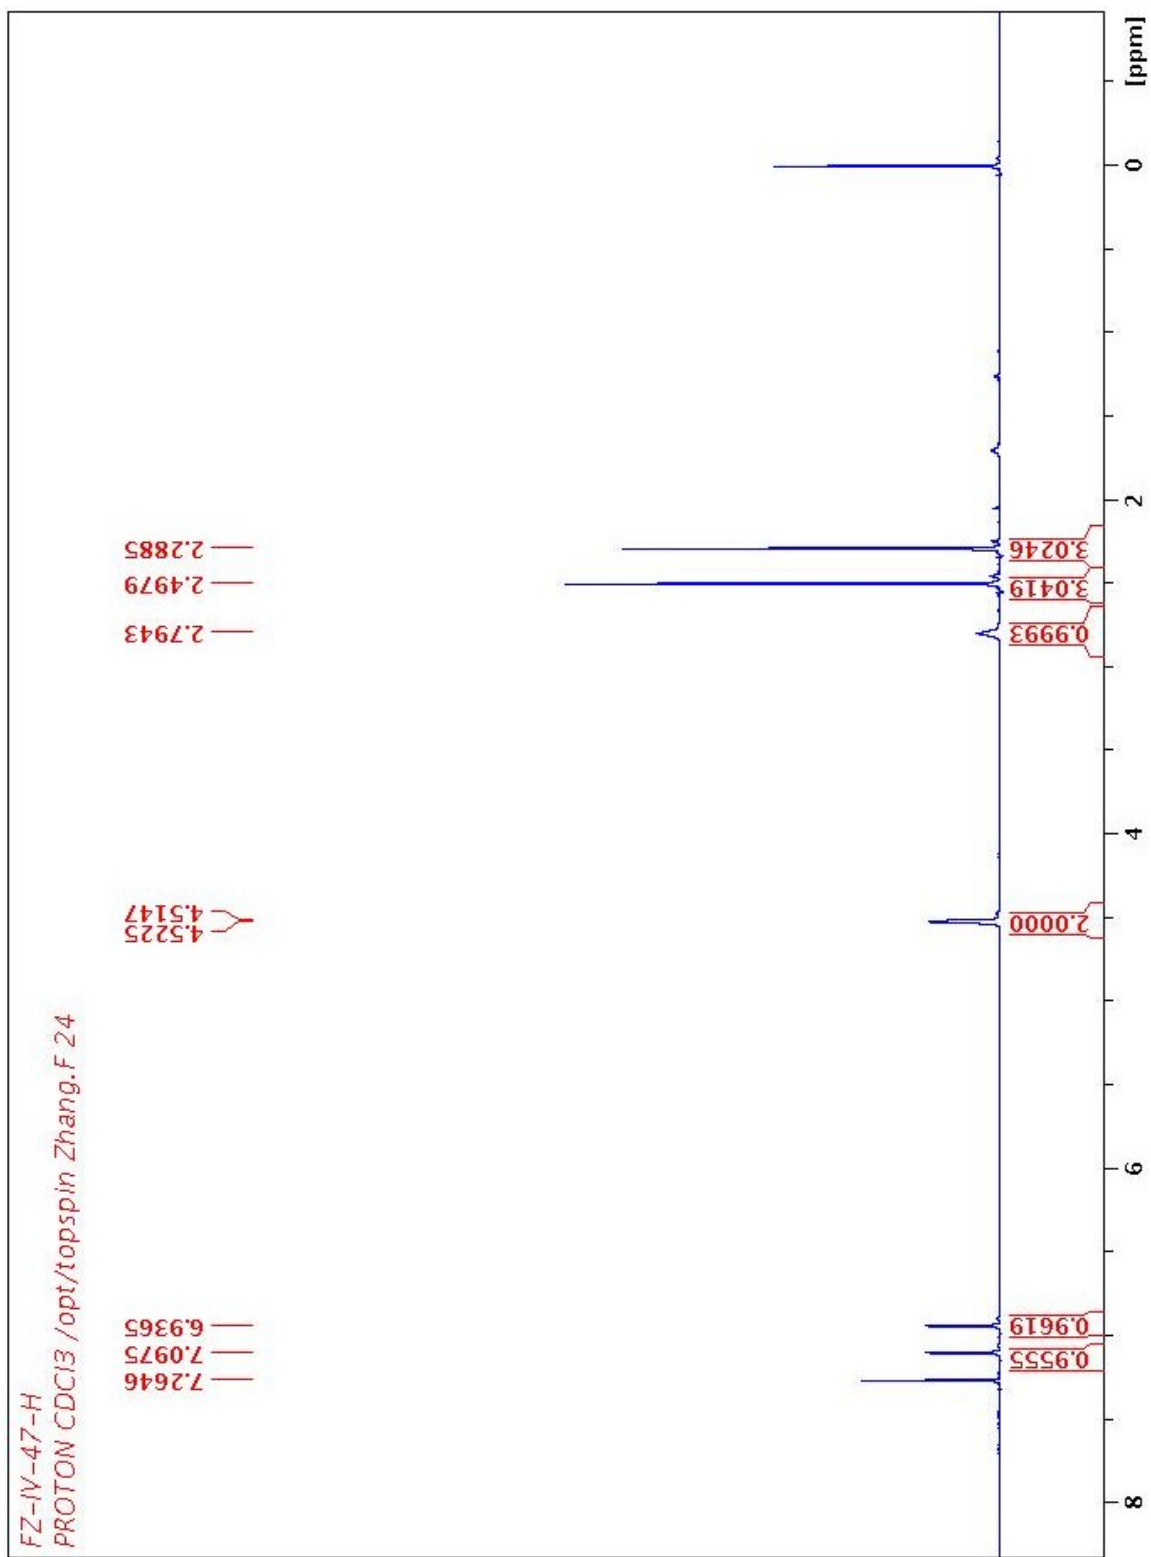

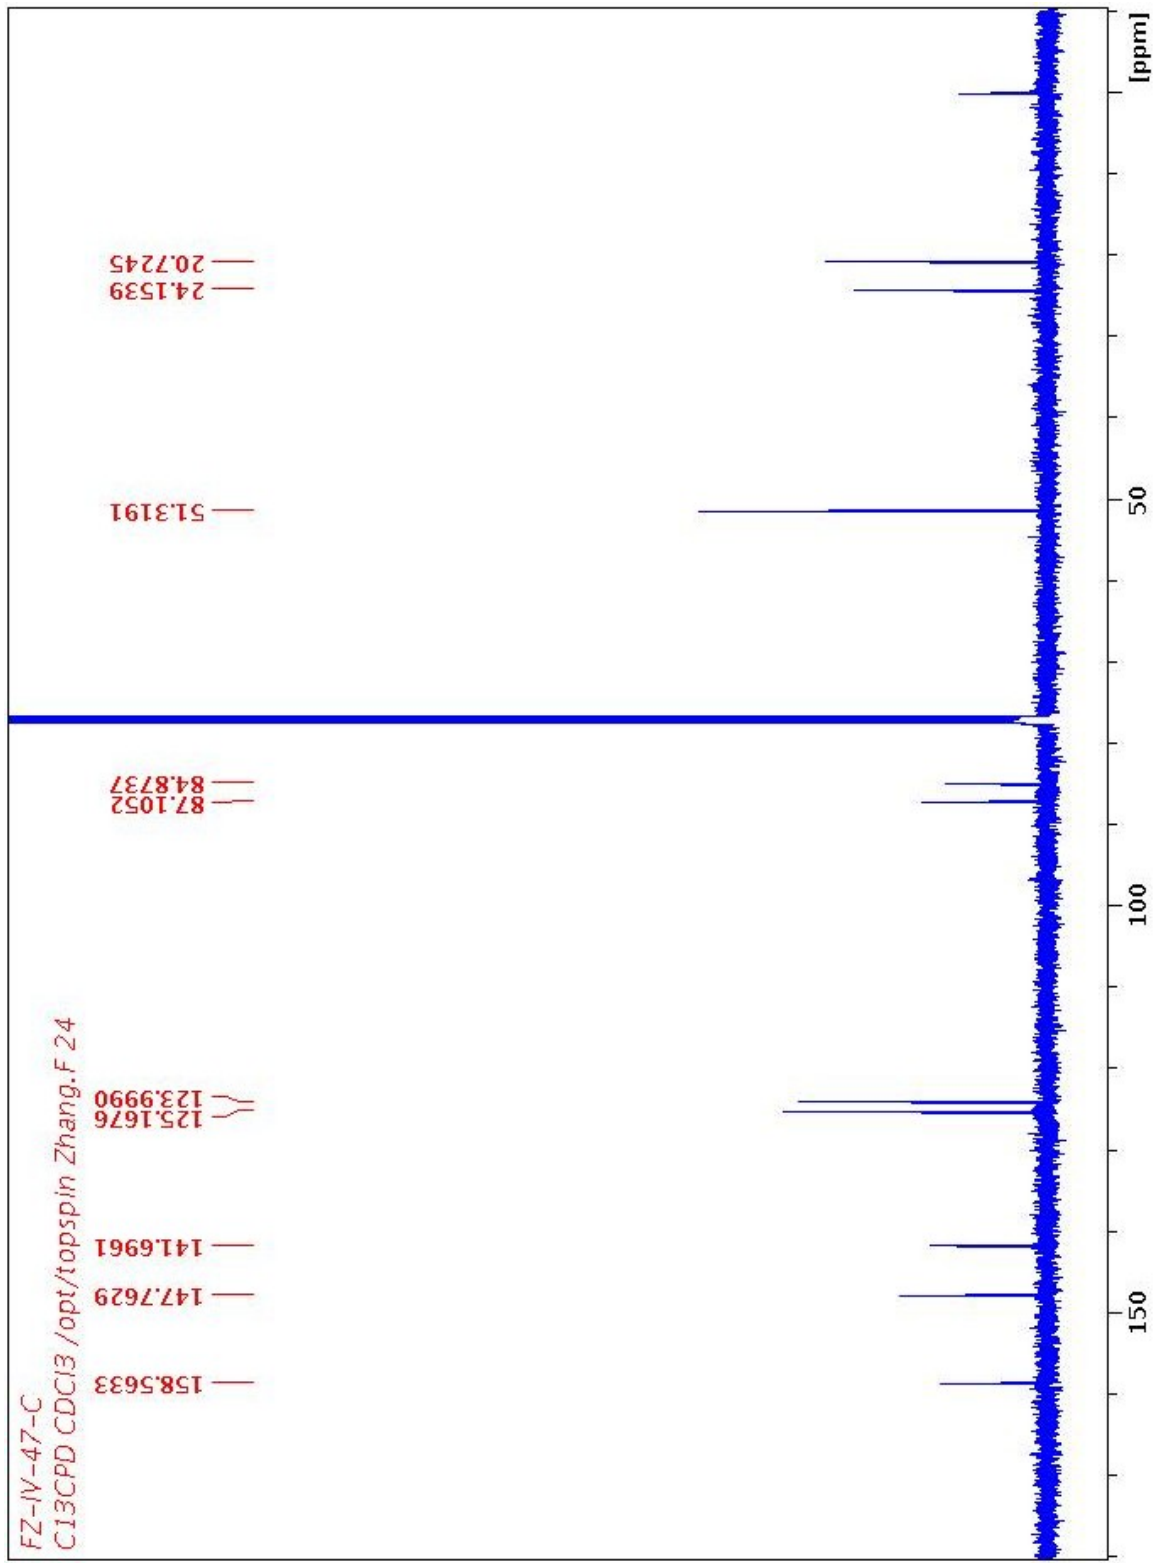

r110809r04 #1-50 RT: 0.00-0.68 AV: 50 NL: 1.87E8  
T: FTMS + p NSIFull.ms [100.00-1500.00]

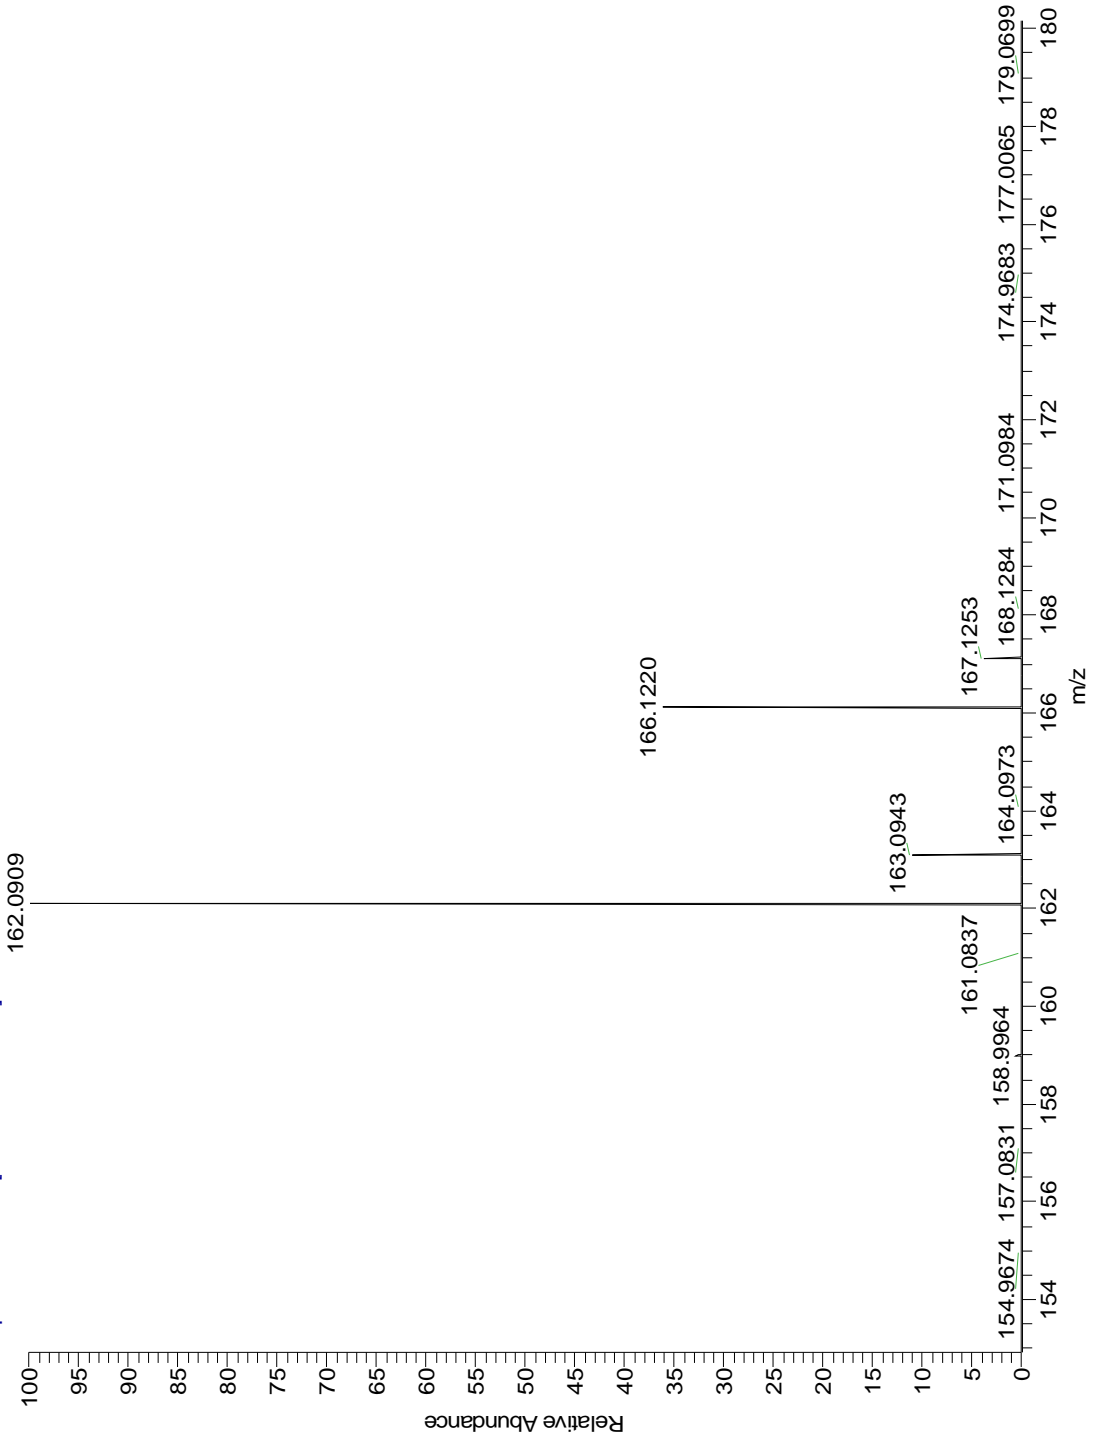



Thu Apr 14 17:58:29 2011 (G

FZ-II-33

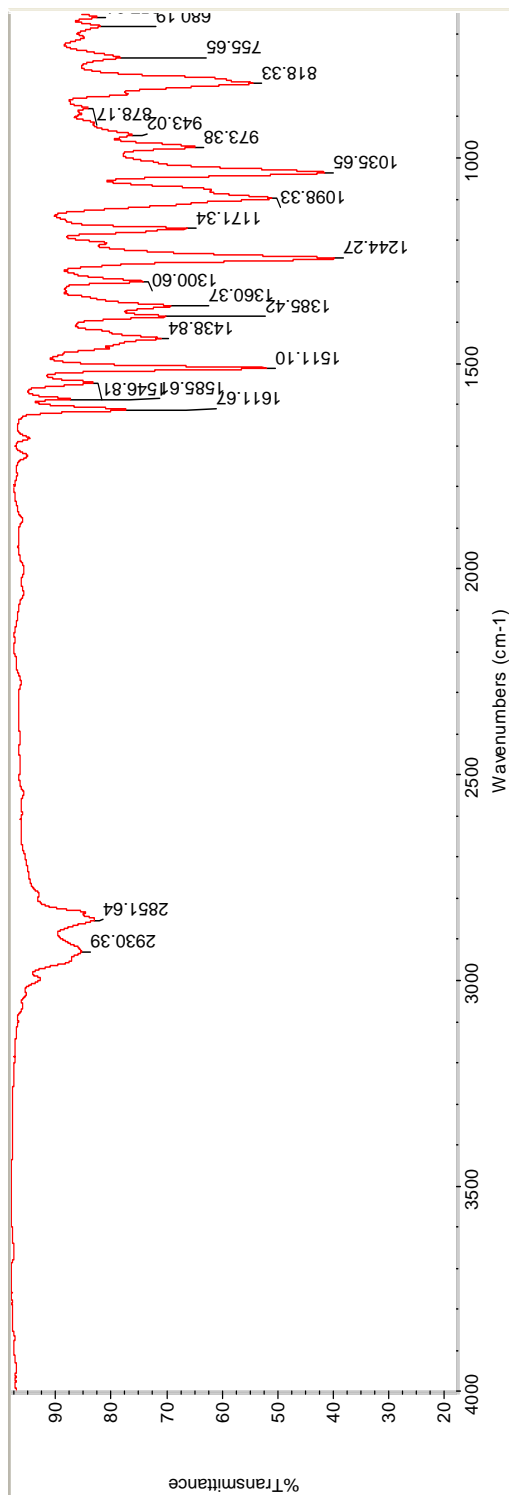

Thu Apr 14 17:58:23 2011 (GMT-04:00)

FIND PEAKS:

Spectrum: FZ-II-33  
Region: 4000.12 649.89  
Absolute threshold: 92.730  
Sensitivity: 50  
Peak list:  
Position: 657.91 Intensity:  
Position: 680.19 Intensity:  
Position: 755.65 Intensity:  
Position: 818.33 Intensity:  
Position: 878.17 Intensity:  
Position: 943.02 Intensity:  
Position: 973.38 Intensity:

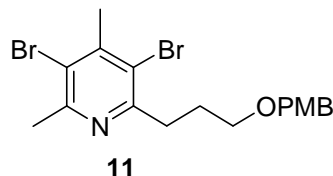

Number of sample scans: 16  
Number of background scans: 16  
Resolution: 4.000  
Sample gain: 1.0  
Optical velocity: 0.4747  
Aperture: 80.00

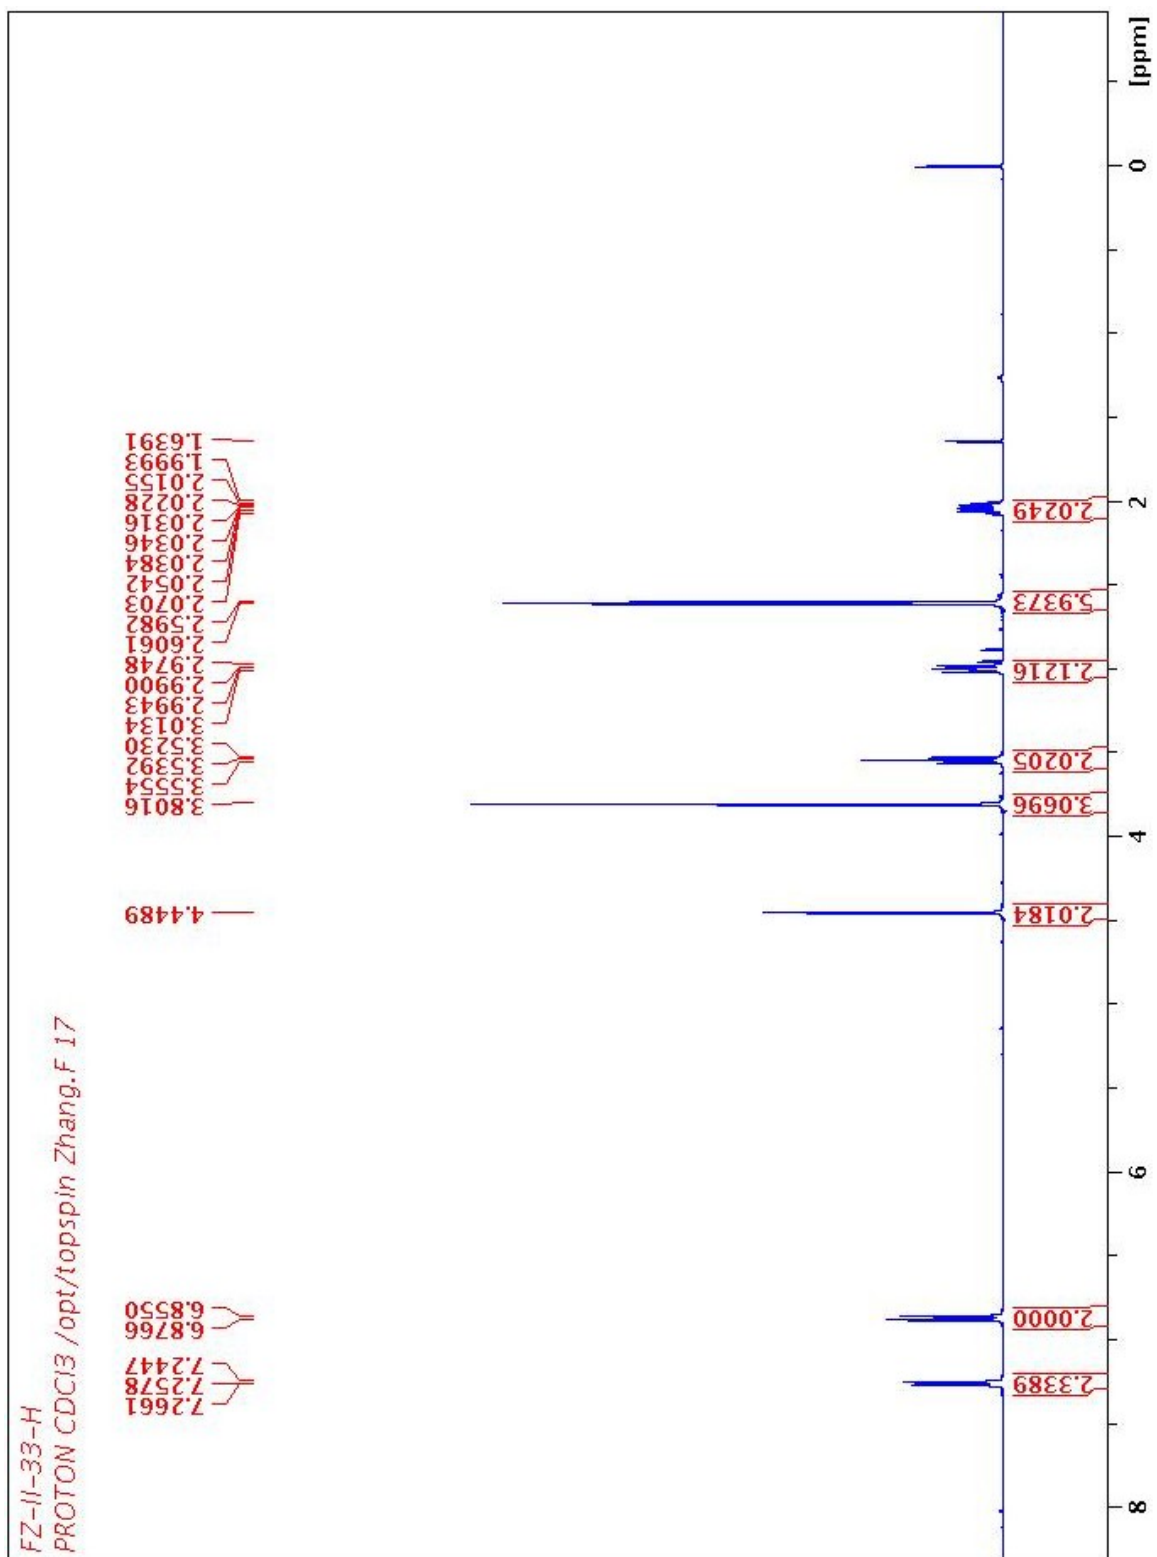

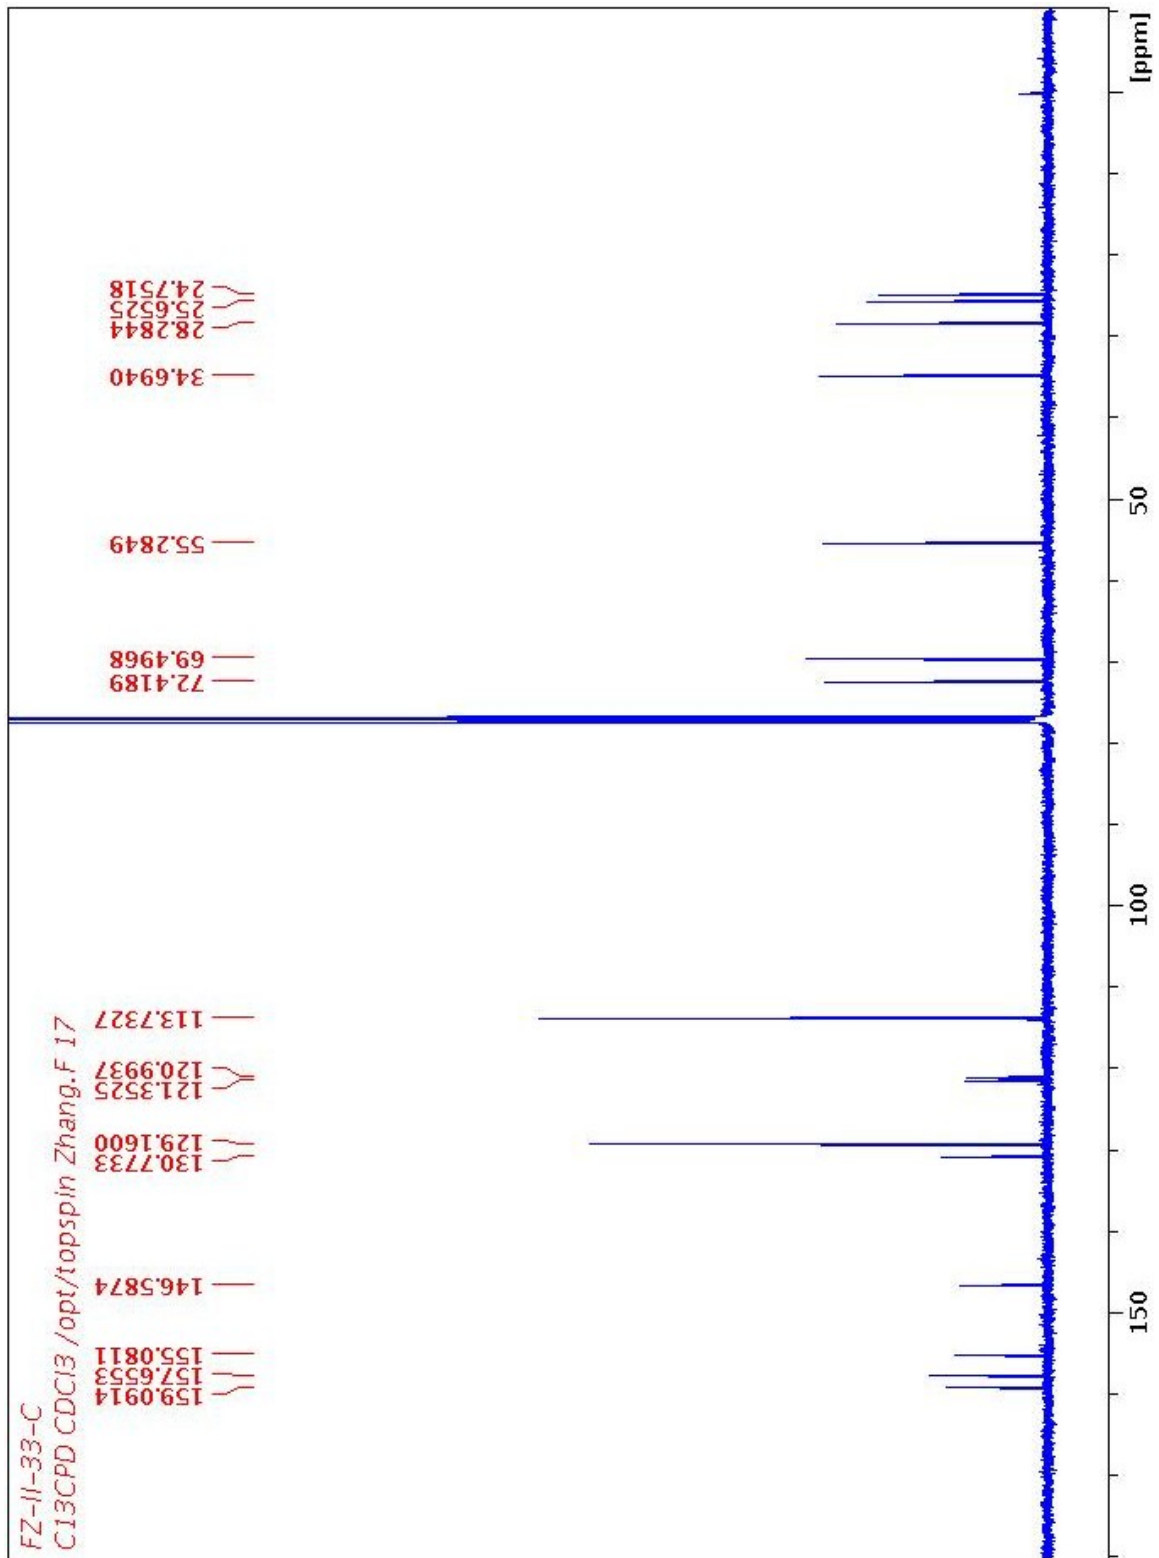

r110809r03 #2-50 RT: 0.02-0.69 AV: 49 NL: 1.91E7  
T: FTMS + p NSI Full ms [100.00-1500.00]

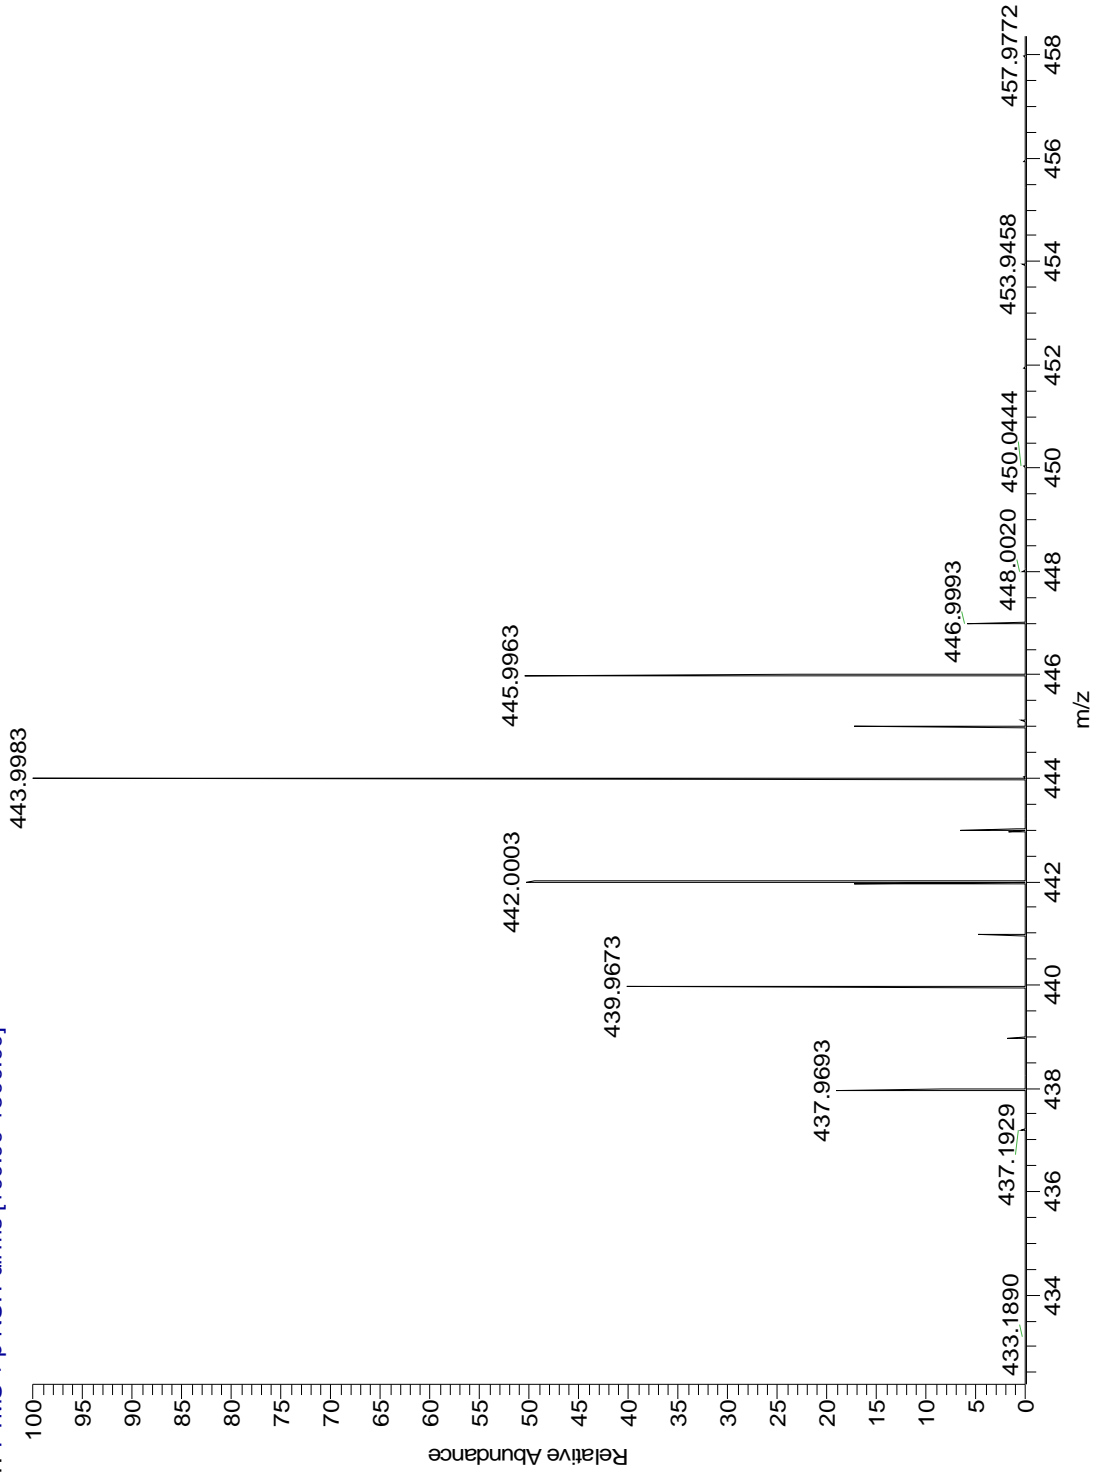

Fri Jun 10 12:17:32 2011 (GI)

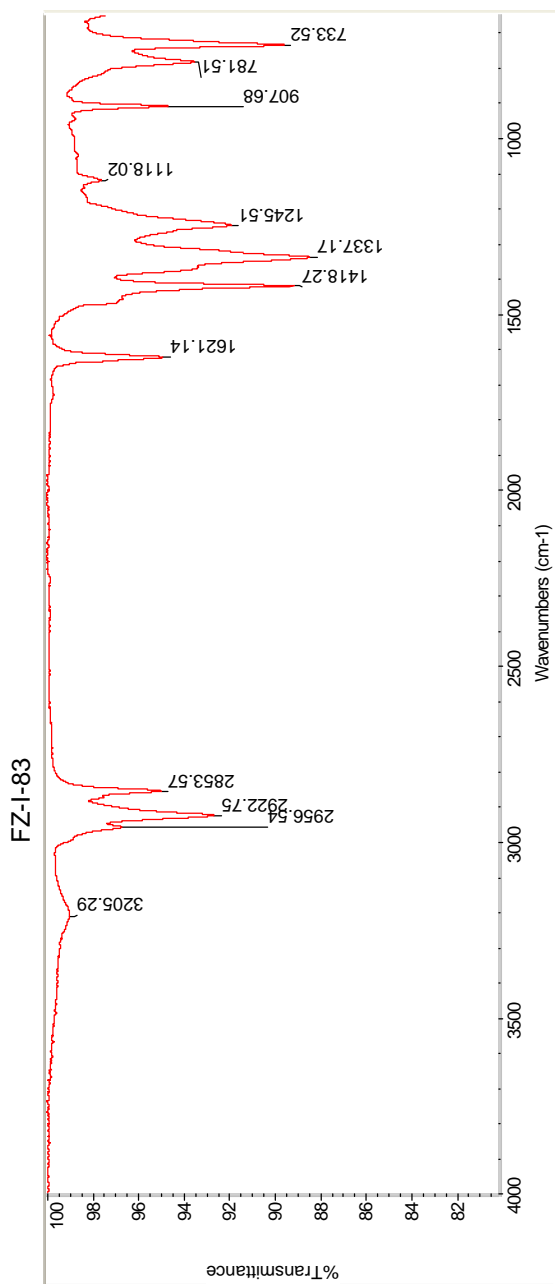

Fri Jun 10 12:17:26 2011 (GMT-04:00)

Number of sample scans: 16  
Number of background scans: 16  
Resolution: 4.000  
Sample gain: 1.0  
Optical velocity: 0.4747  
Aperture: 80.00

FIND PEAKS: FZ-I-83  
Region: 4000.00 400.00  
Absolute threshold: 99.112  
Sensitivity: 50  
Peak list:  
Position: 733.52 Intensity:  
Position: 781.51 Intensity:  
Position: 907.68 Intensity:  
Position: 1118.02 Intensity:  
Position: 1245.51 Intensity:  
Position: 1337.17 Intensity:  
Position: 1418.27 Intensity:

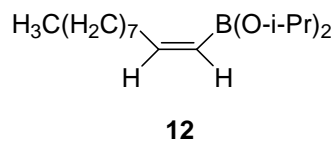

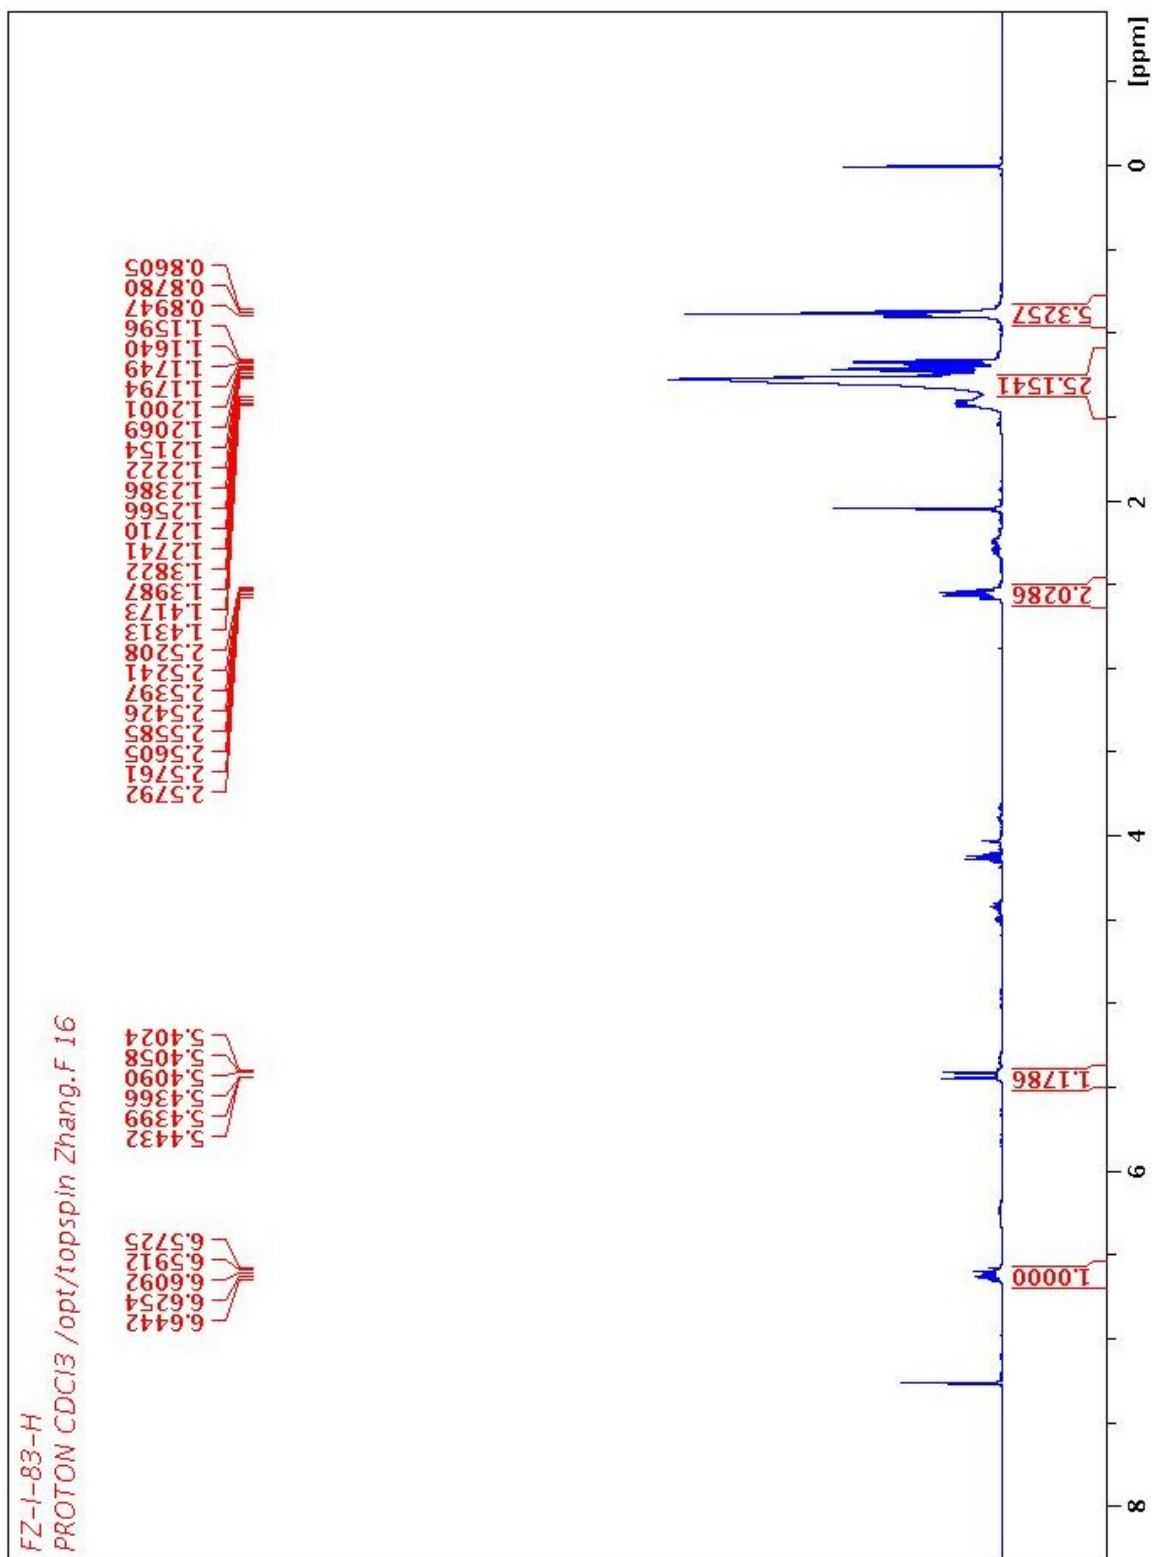

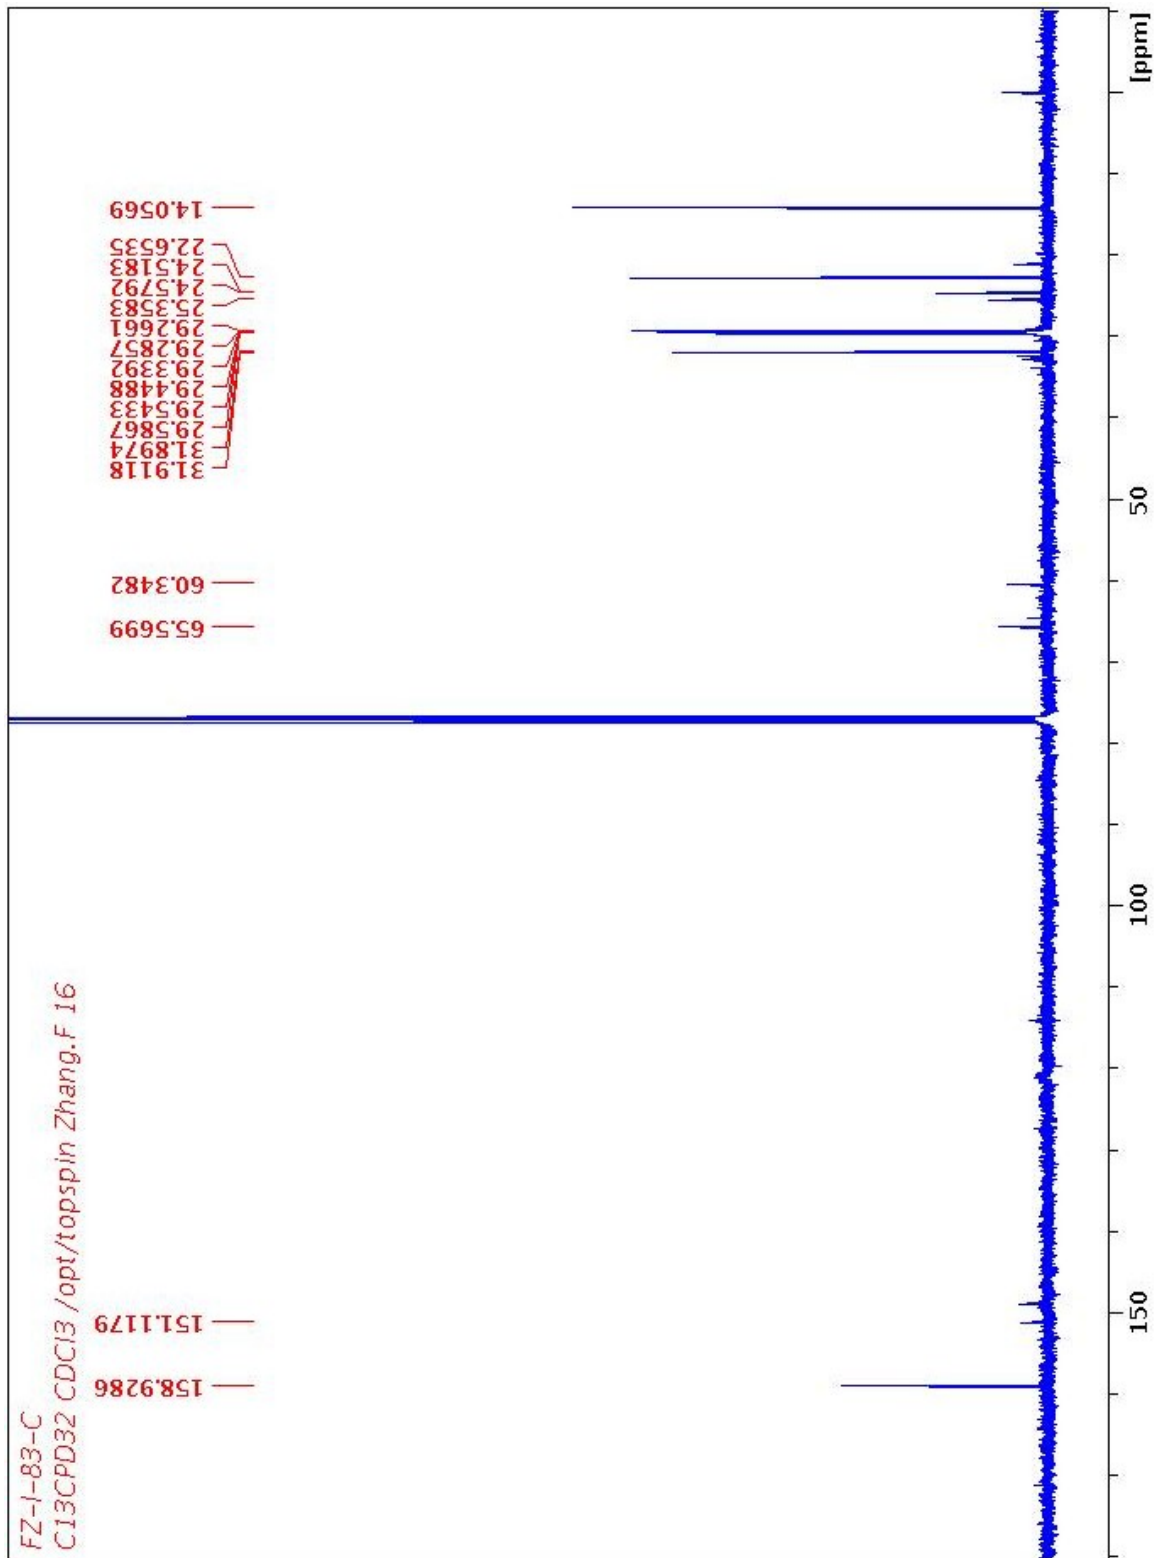

Thu Apr 14 18:00:52 2011 (G

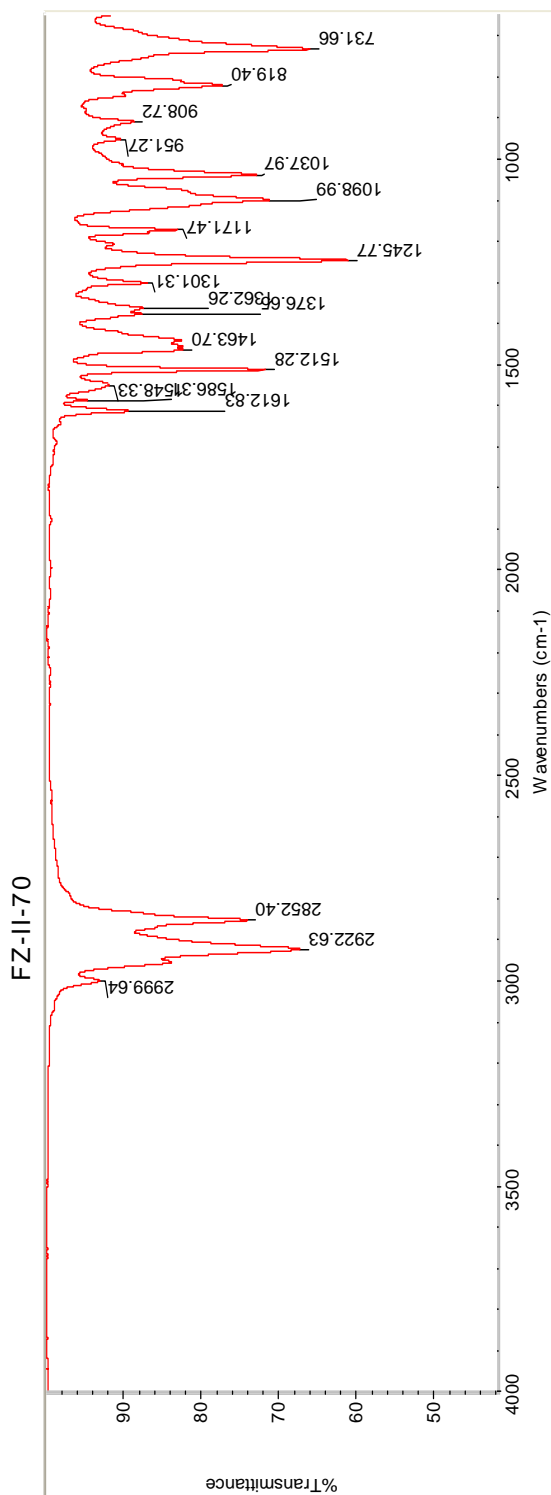

Thu Apr 14 18:00:47 2011 (GMT-04:00)

FIND PEAKS:

| Position | Intensity |
|----------|-----------|
| 731.66   | Intensiv  |
| 819.40   | Intensiv  |
| 908.72   | Intensiv  |
| 951.27   | Intensiv  |
| 1037.97  | Intensiv  |
| 1098.99  | Intensiv  |
| 1171.47  | Intensiv  |

Number of sample scans: 16  
Number of background scans: 16  
Resolution: 4.000  
Sample gain: 1.0  
Optical velocity: 0.4747  
Aperture: 80.00

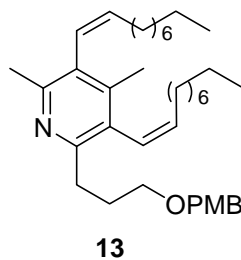



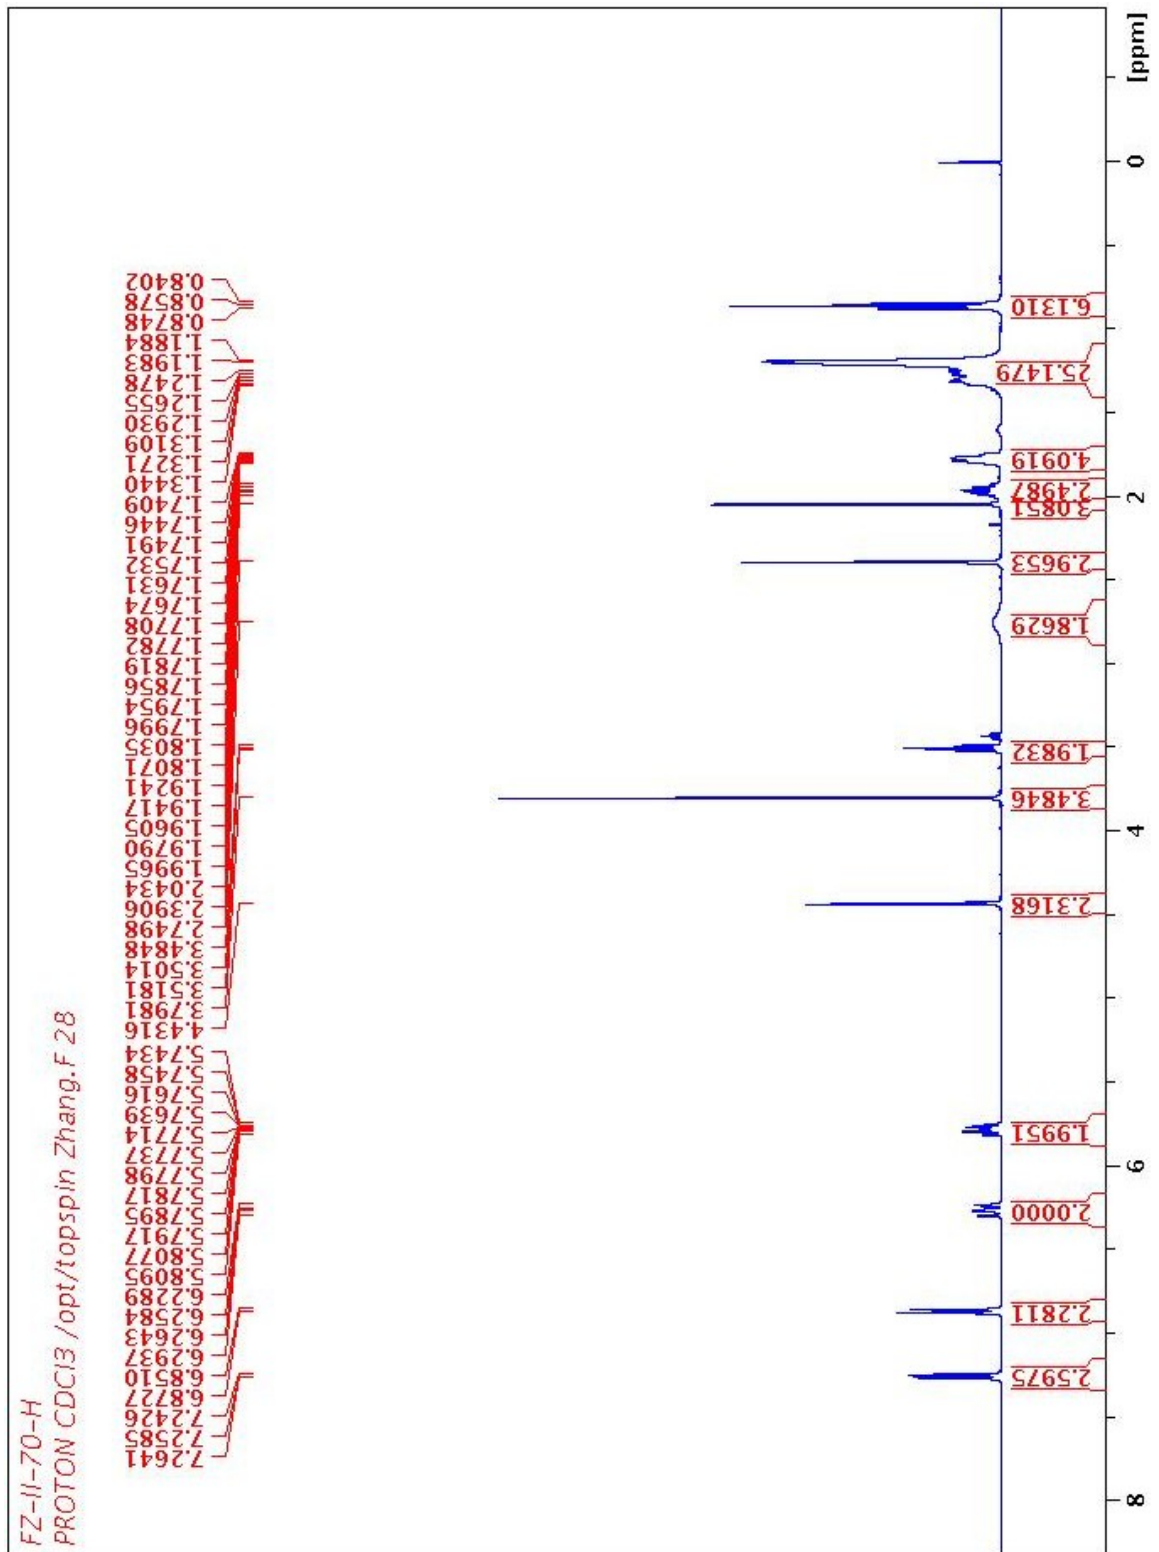

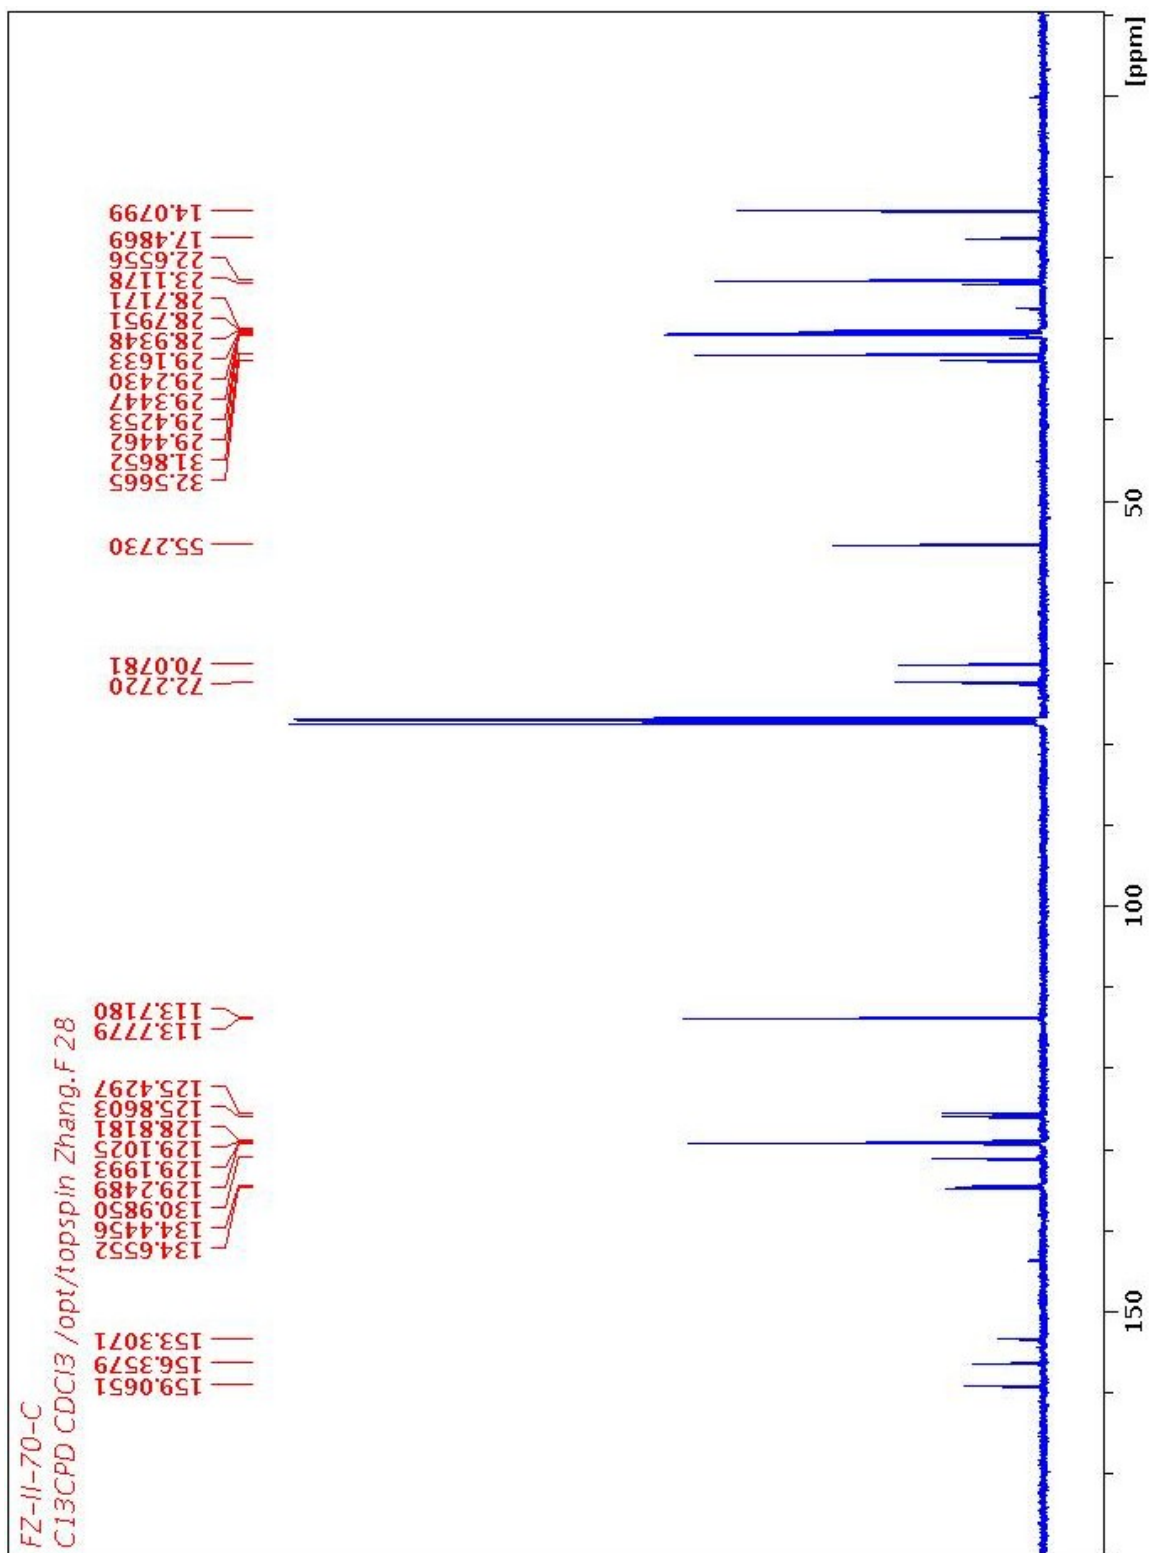

r110809r05 #1-49 RT: 0.01-0.68 AV: 49 NL: 1.51E7  
T: FTMS + p NSIFull.ms [300.00-1500.00]

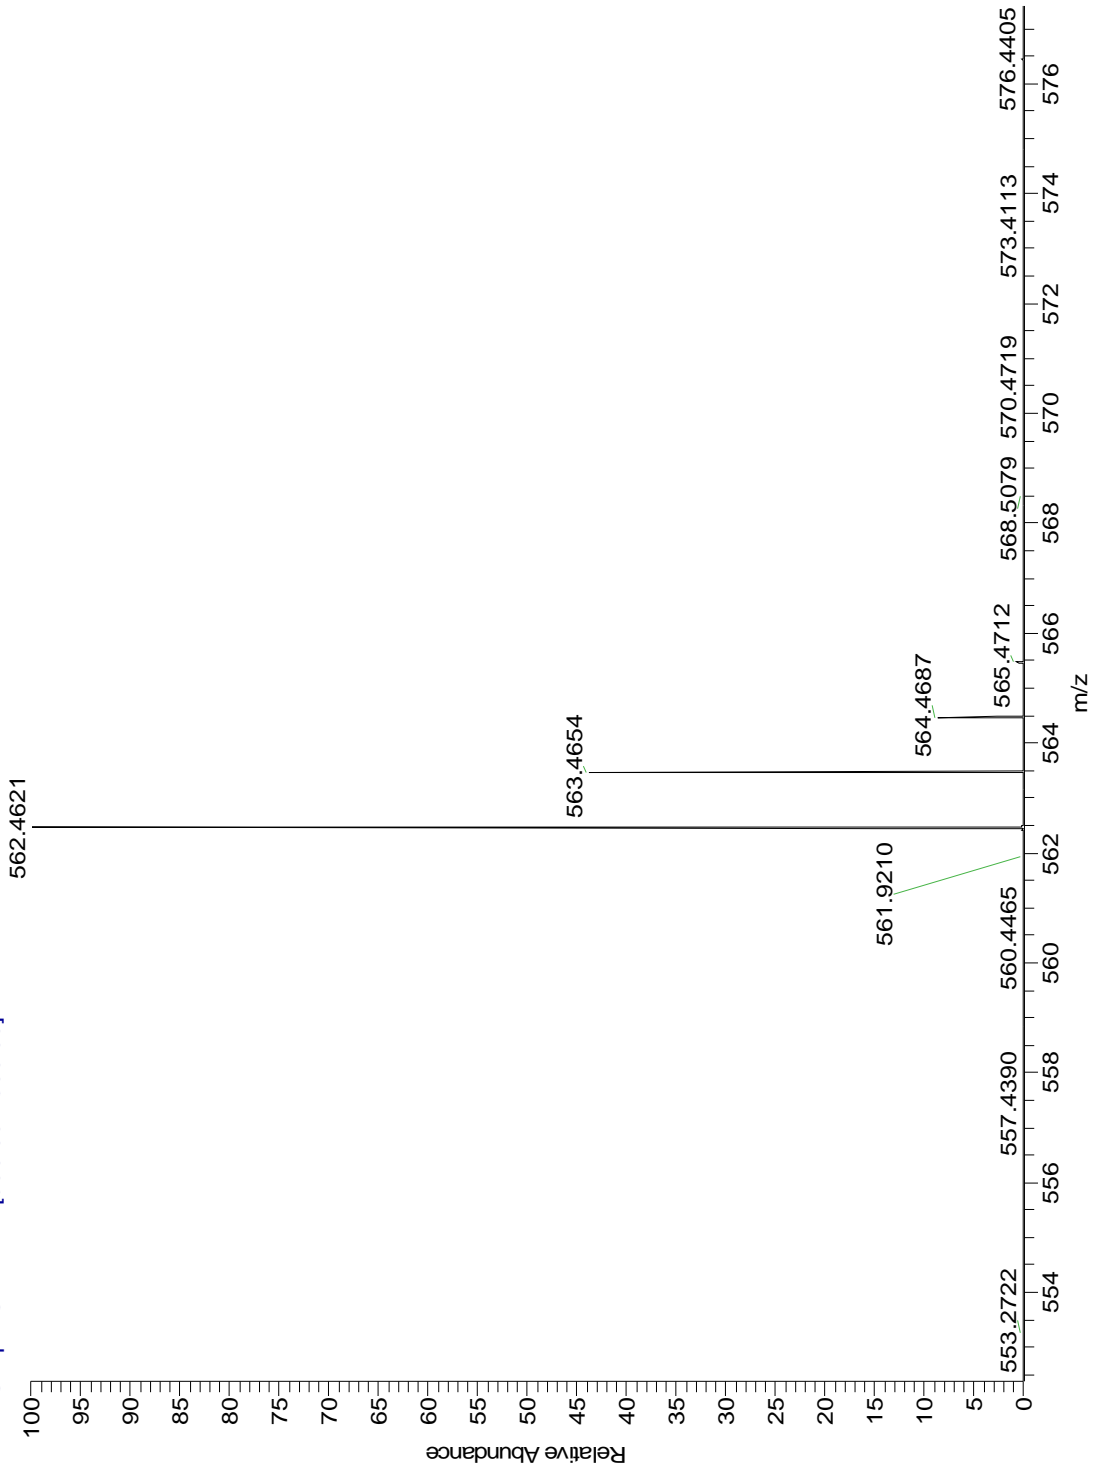



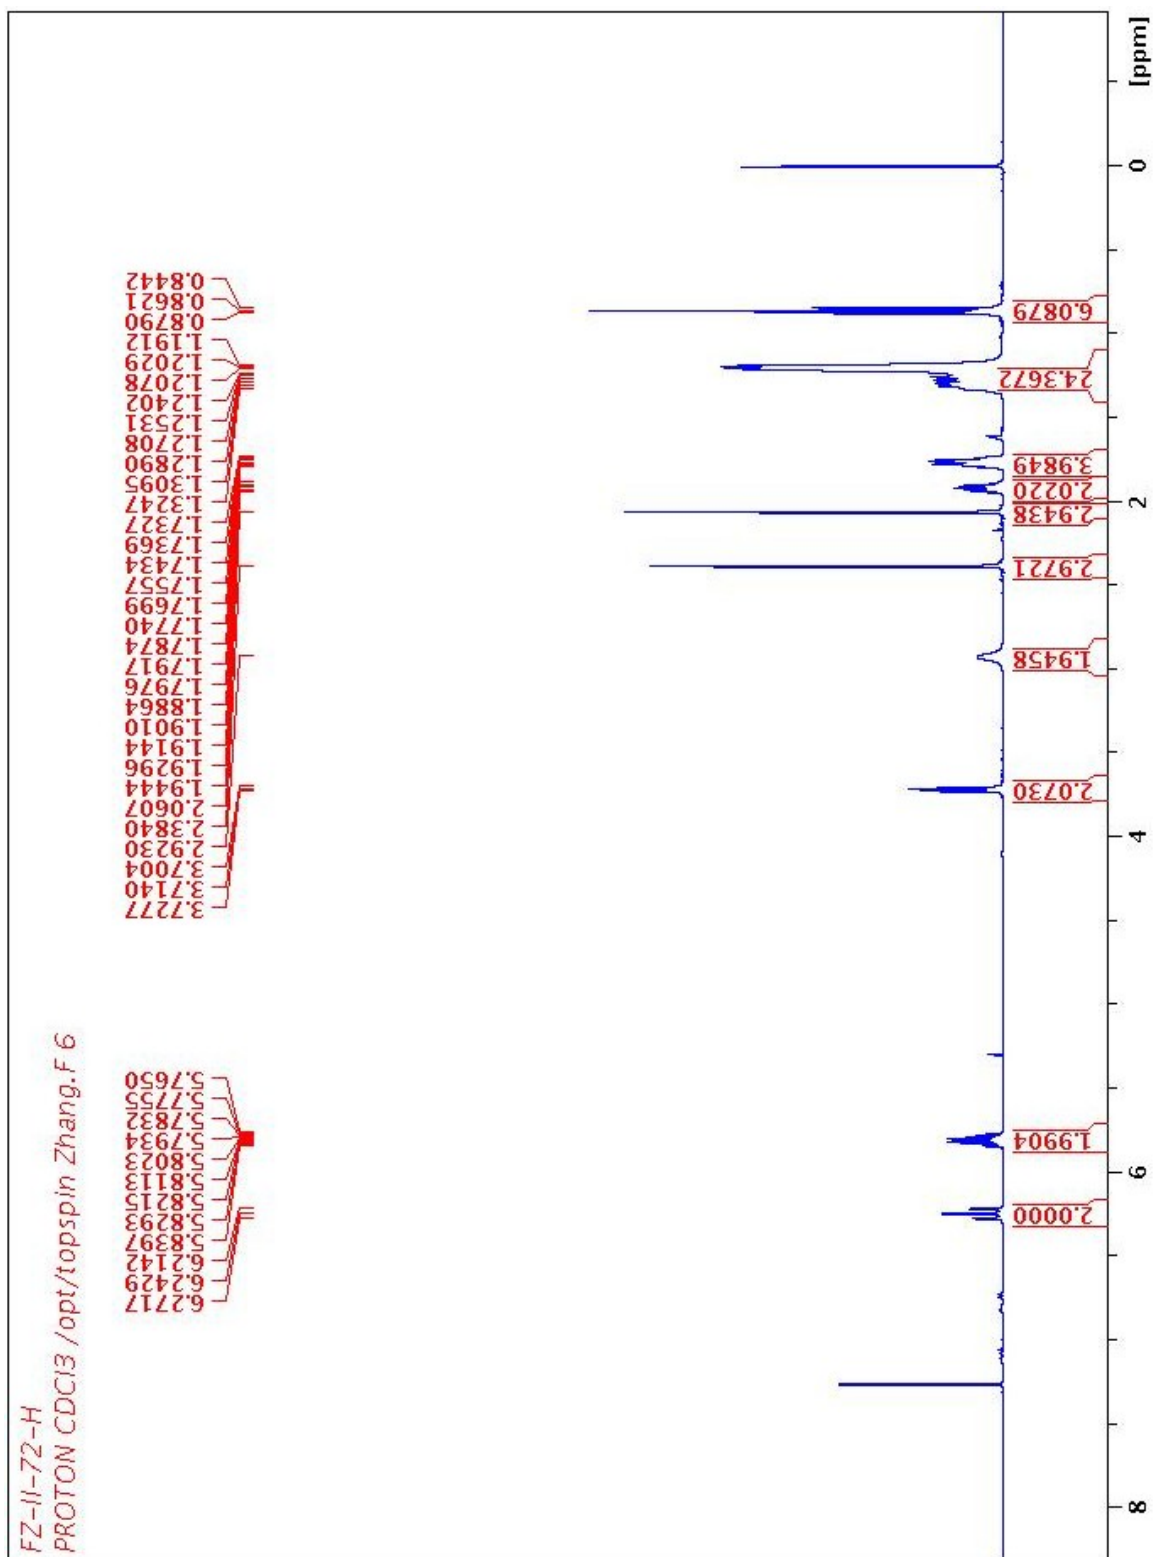

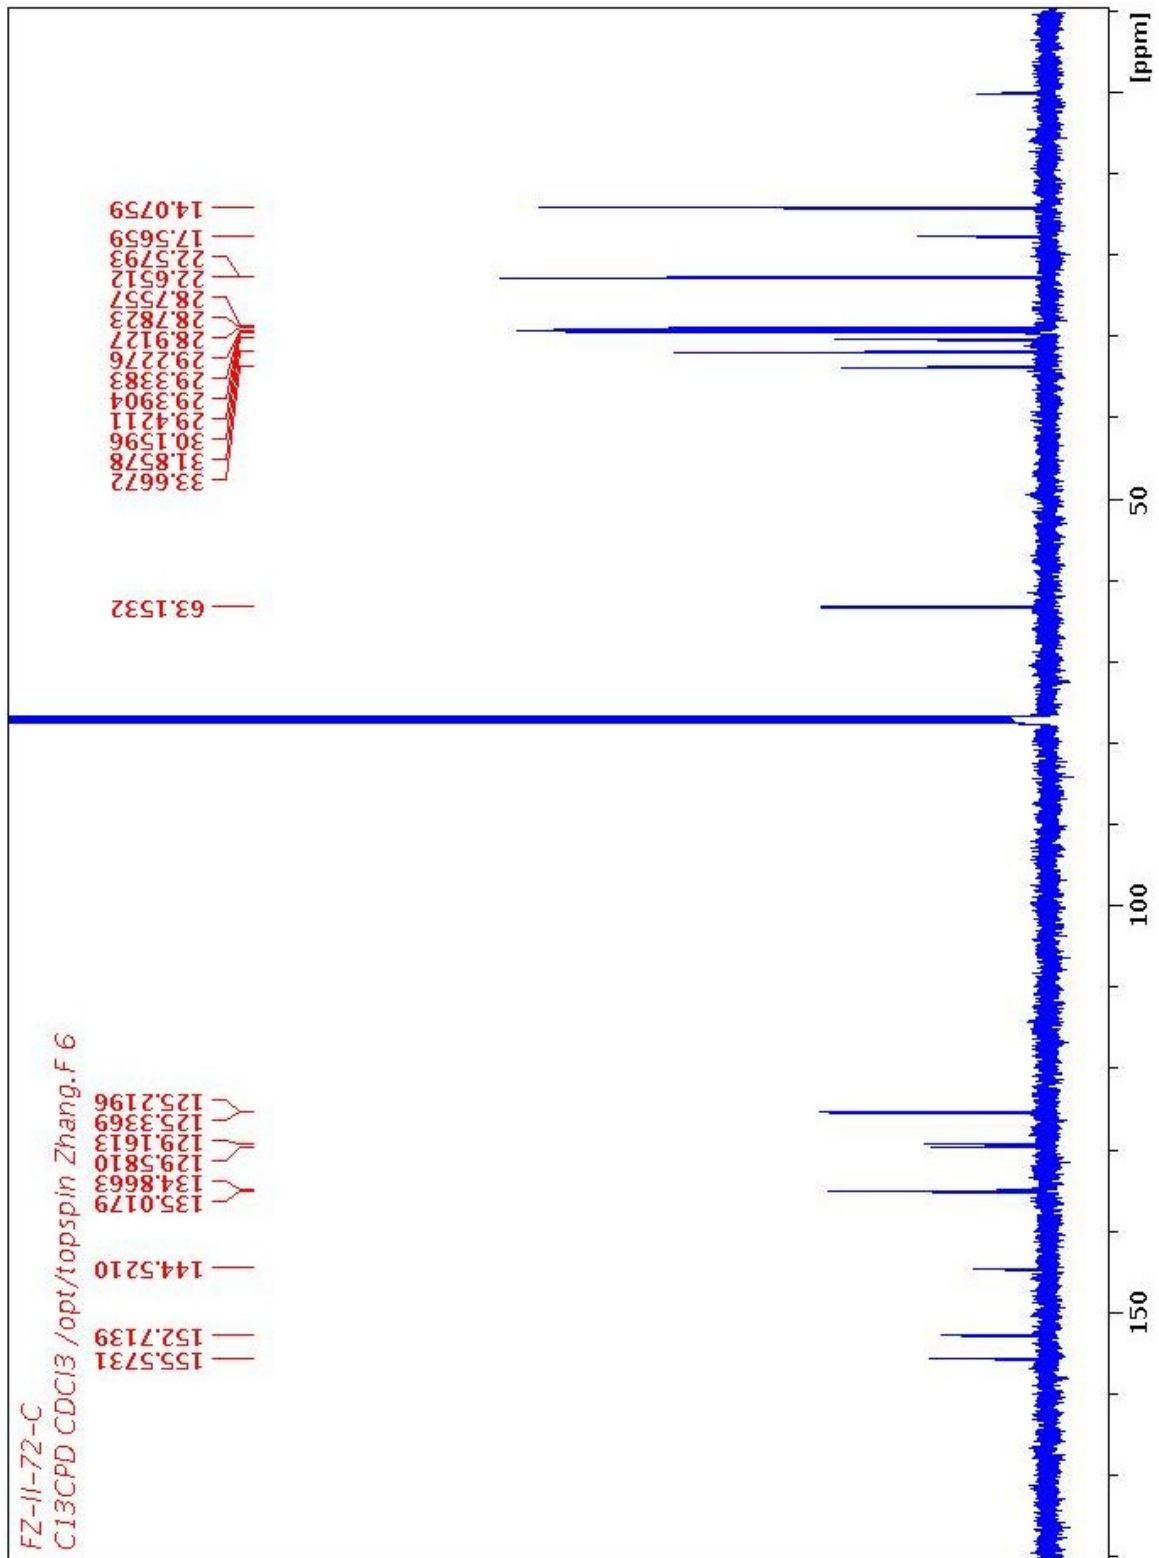

r110809r06 #31-50 RT: 0.43-0.70 AV: 20 NL: 2.28E7  
T: FTMS + p NSI Full ms [300.00-1500.00]

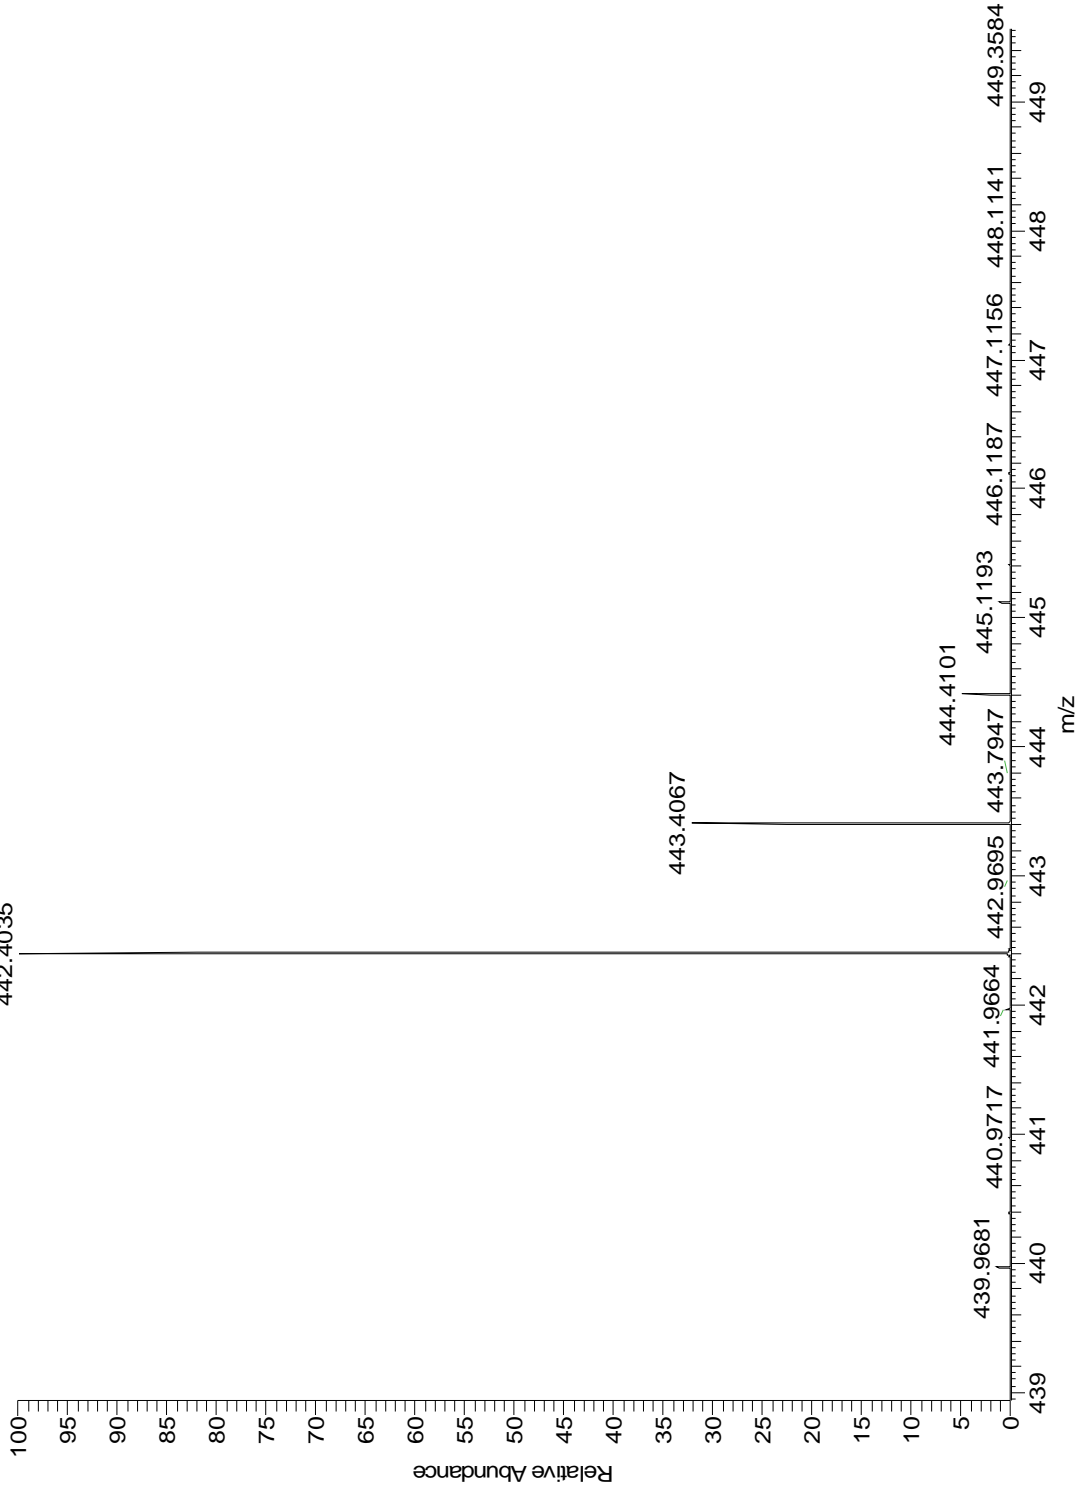





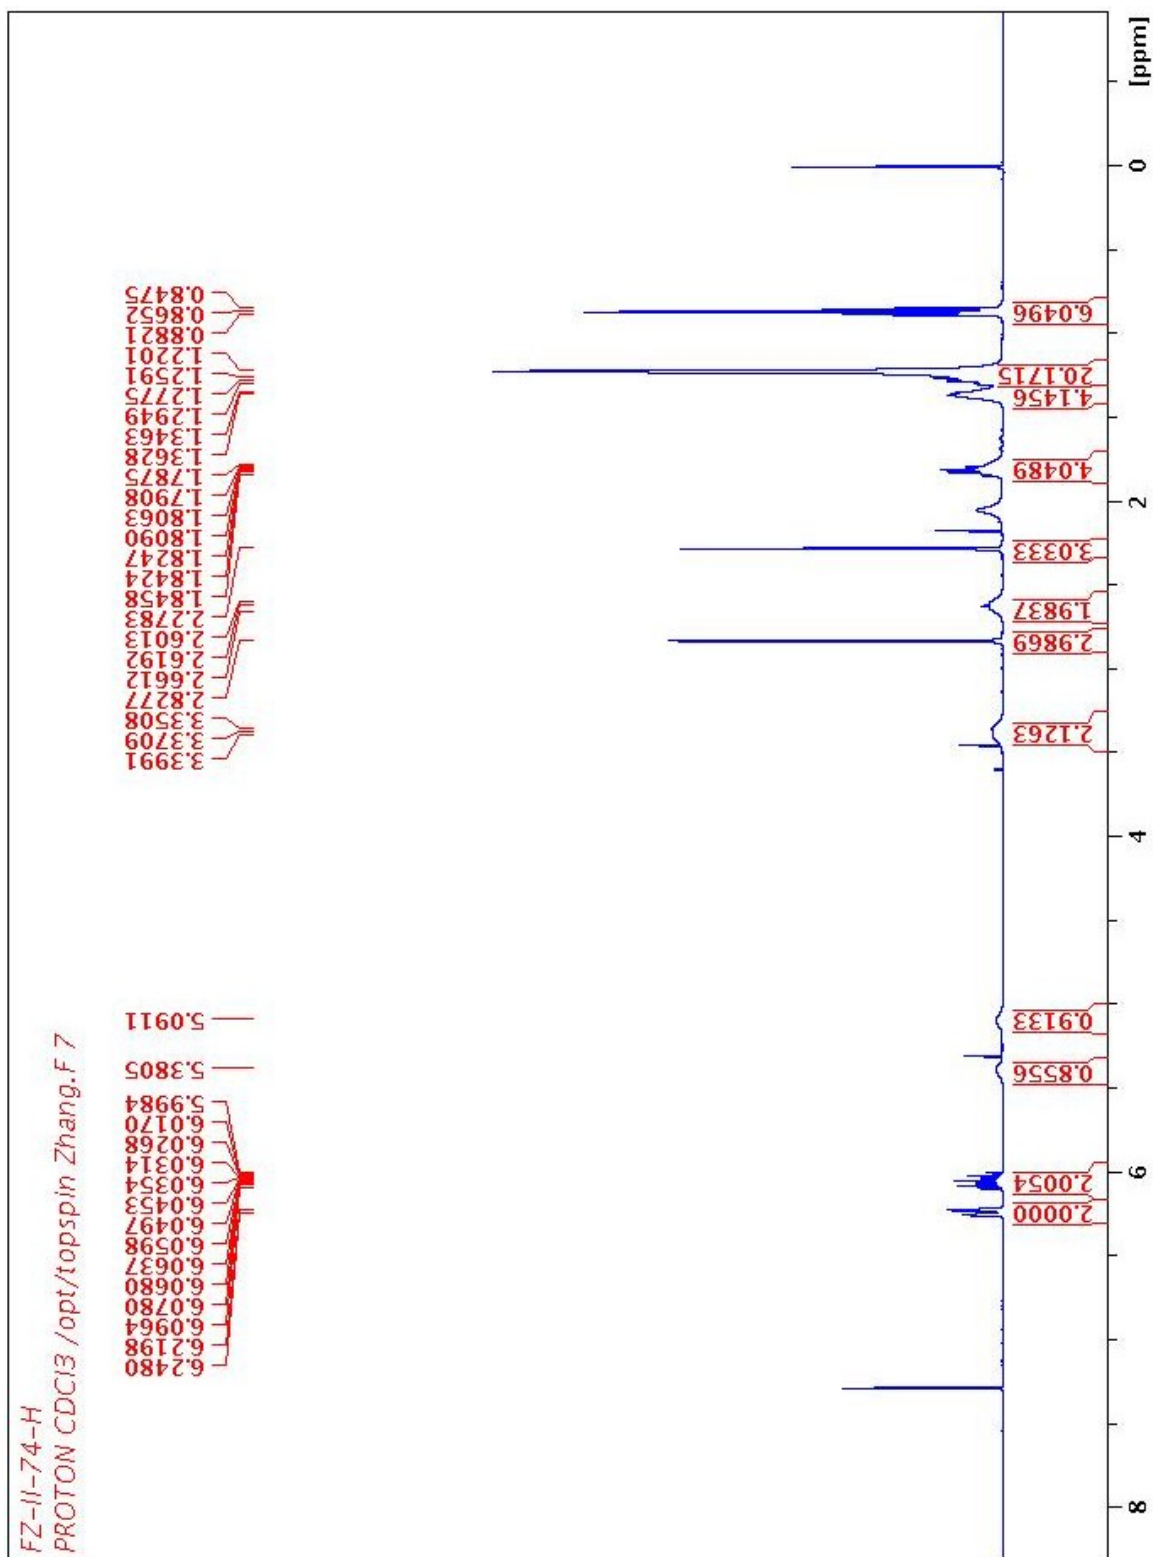

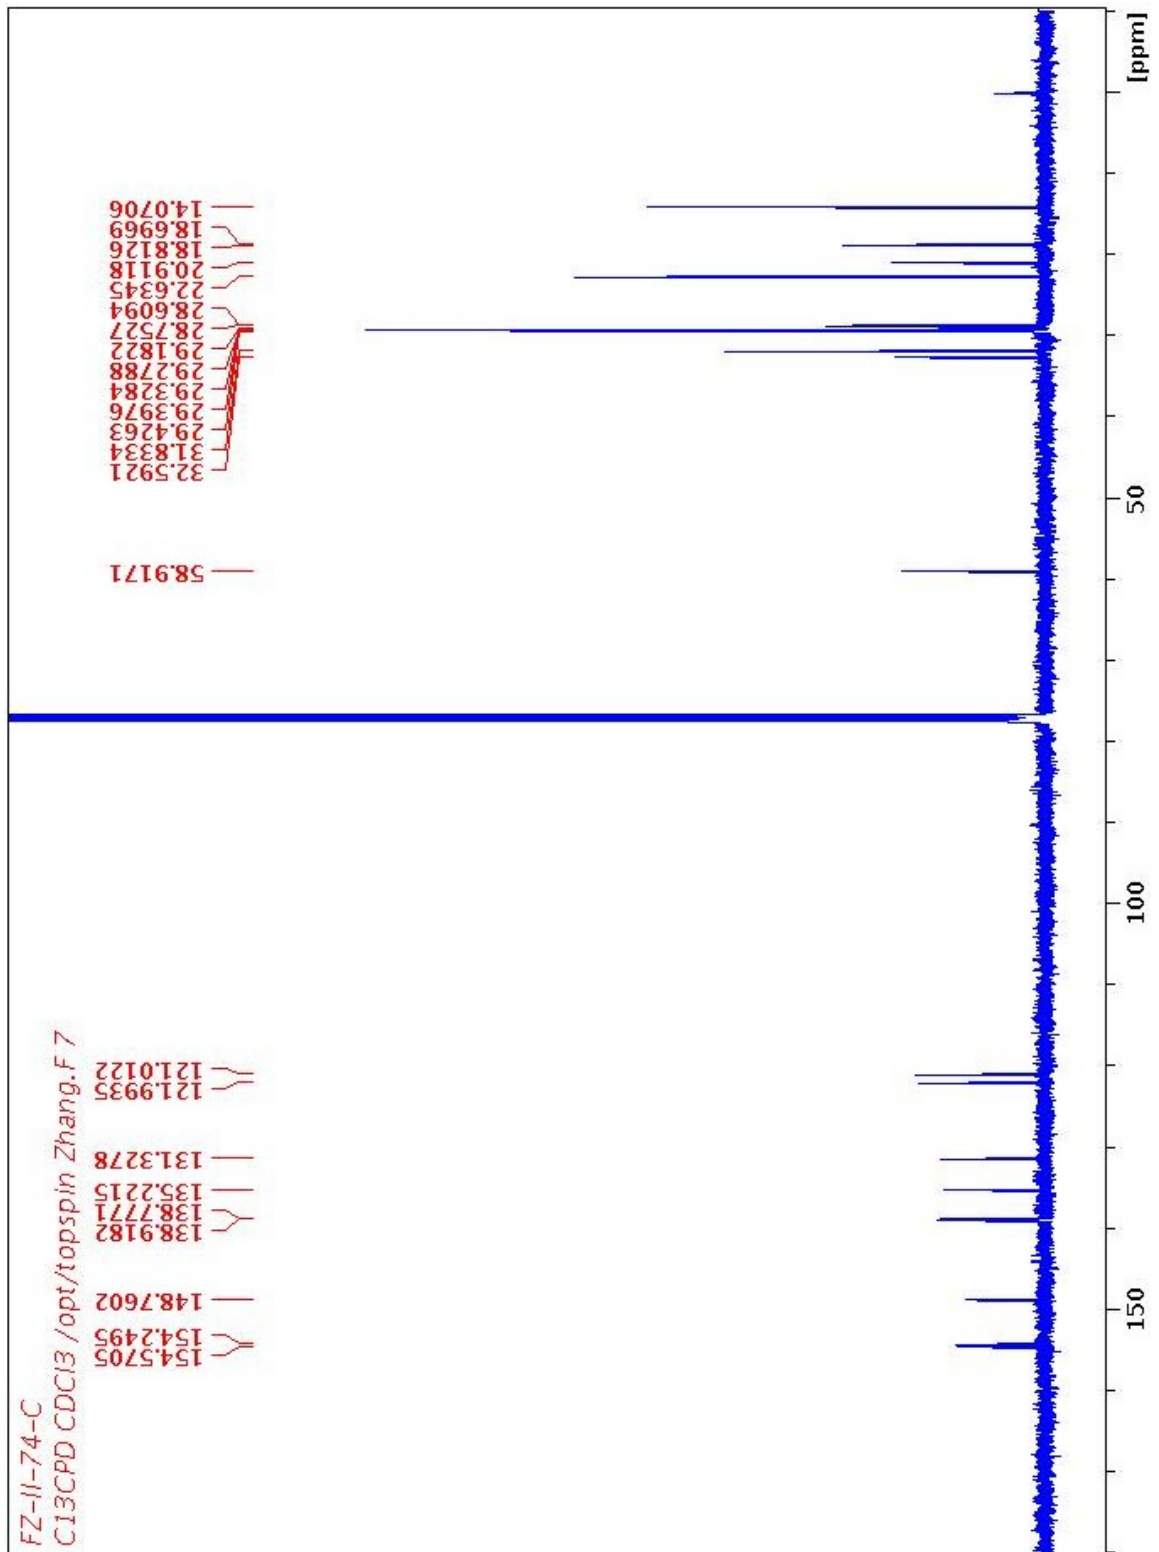

Fri Jun 10 12:14:37 2011 (GI)

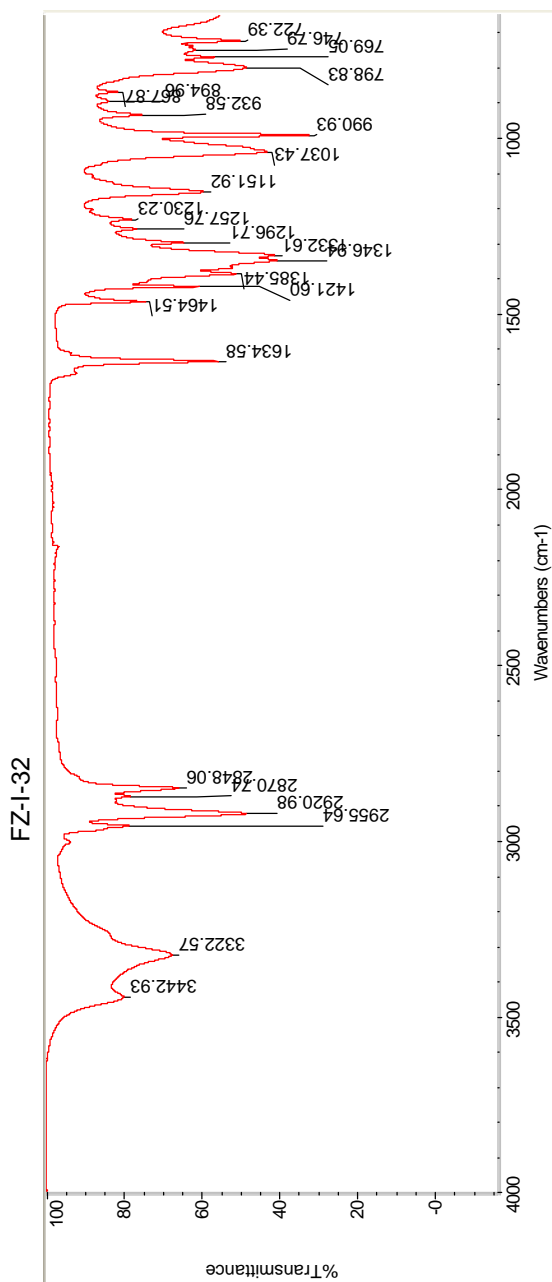

Fri Jun 10 12:14:27 2011 (GMT-04:00)

FIND PEAKS:

| Spectrum:           | FZ-I-32   |
|---------------------|-----------|
| Region:             | 4000.12   |
| Absolute threshold: | 649.89    |
| Sensitivity:        | 90.470    |
| Peak list:          |           |
| Position:           | 722.39    |
| Intensity:          | Intensiv: |
| Position:           | 746.79    |
| Intensity:          | Intensiv: |
| Position:           | 769.05    |
| Intensity:          | Intensiv: |
| Position:           | 798.83    |
| Intensity:          | Intensiv: |
| Position:           | 867.87    |
| Intensity:          | Intensiv: |
| Position:           | 894.96    |
| Intensity:          | Intensiv: |
| Position:           | 932.58    |
| Intensity:          | Intensiv: |

Number of sample scans: 16  
Number of background scans: 16  
Resolution: 4.000  
Sample gain: 1.0  
Optical velocity: 0.4747  
Aperture: 80.00

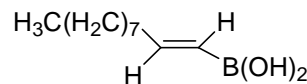

15

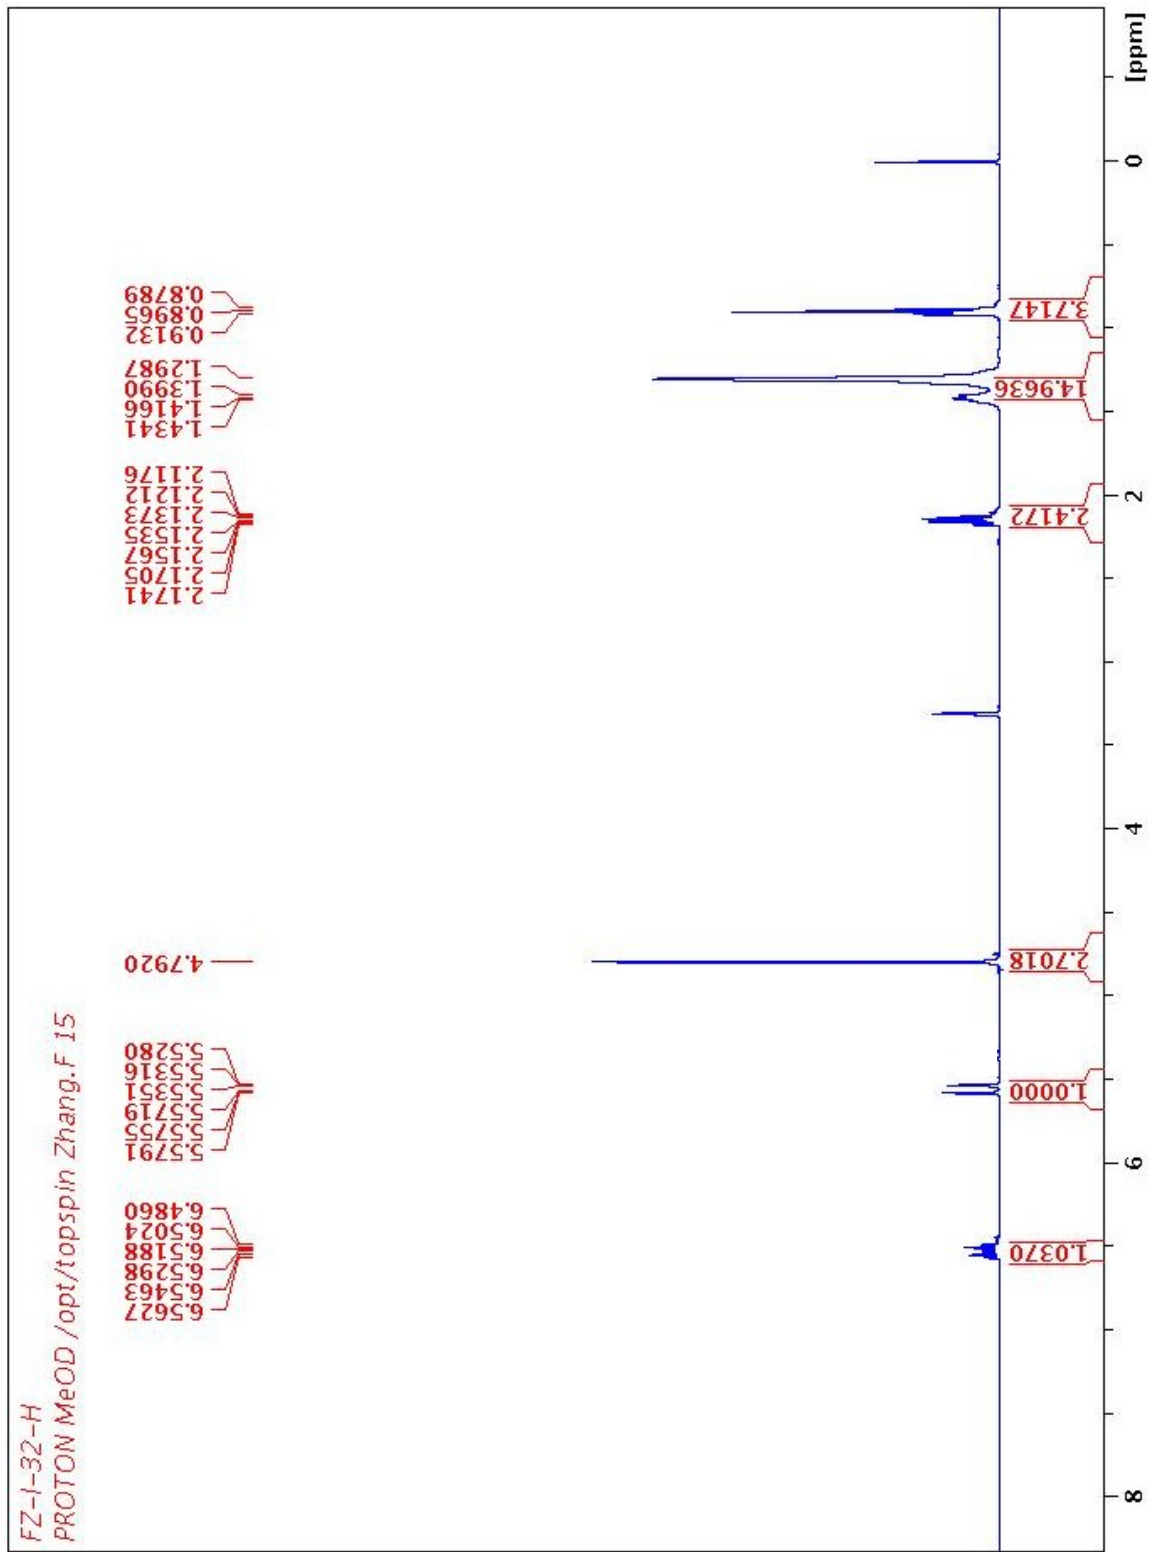

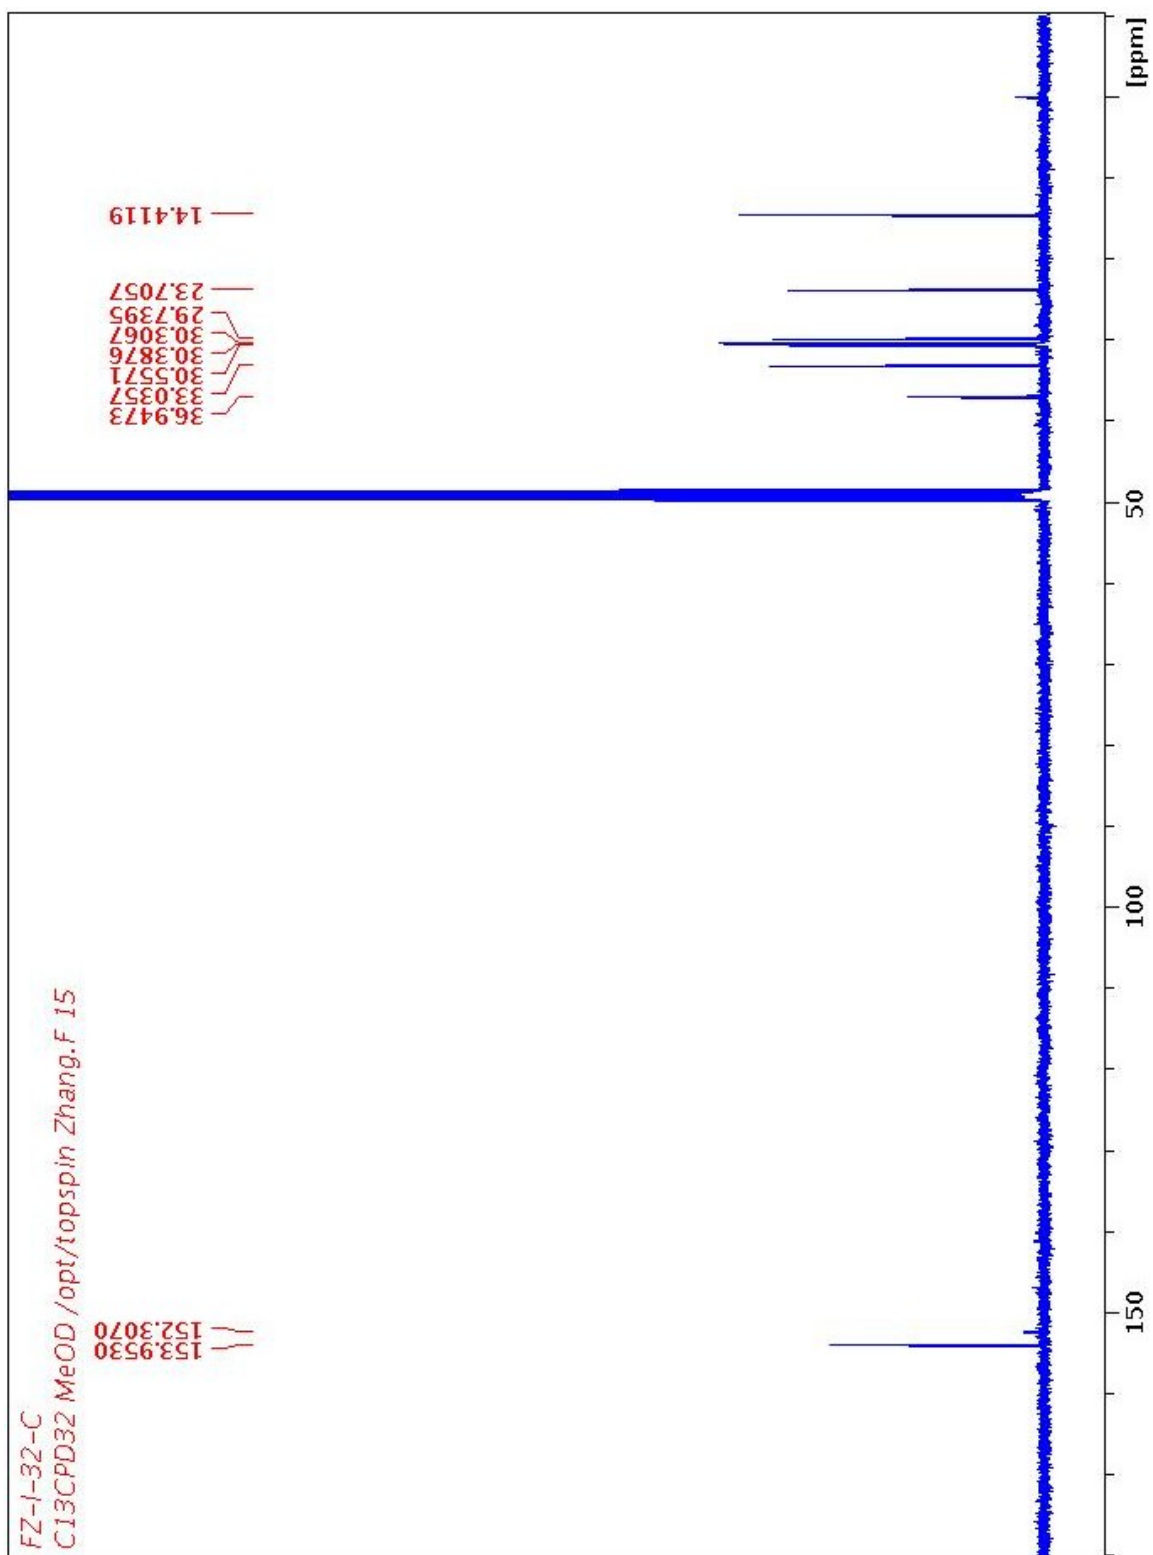

Thu Apr 14 17:59:10 2011 (G

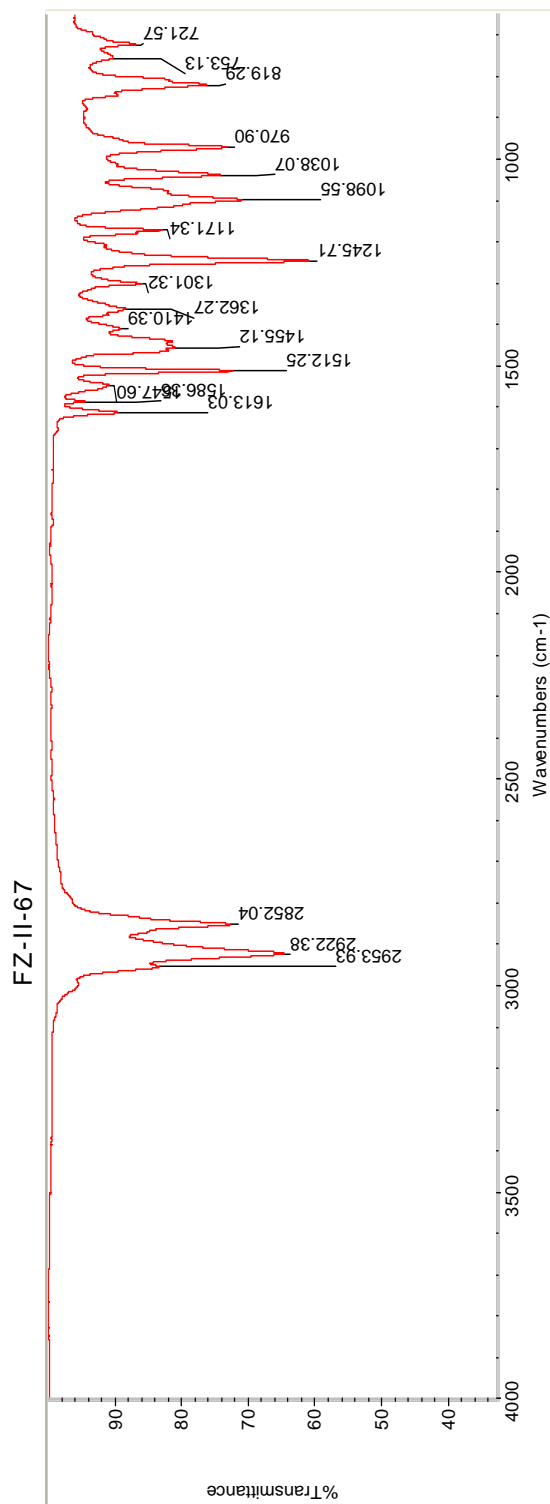

Thu Apr 14 17:59:05 2011 (GMT-04:00)

Number of sample scans: 16  
Number of background scans: 16  
Resolution: 4.000  
Sample gain: 1.0  
Optical velocity: 0.4747  
Aperture: 80.00

FIND PEAKS:  
Spectrum: FZ-II-67  
Region: 4000.12 649.89  
Absolute threshold: 97.735  
Sensitivity: 50  
Peak list:  
Position: 721.57 Intensity:  
Position: 753.13 Intensity:  
Position: 819.29 Intensity:  
Position: 970.90 Intensity:  
Position: 1038.07 Intensity:  
Position: 1098.55 Intensity:  
Position: 1171.34 Intensity:

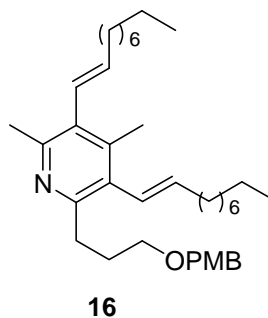

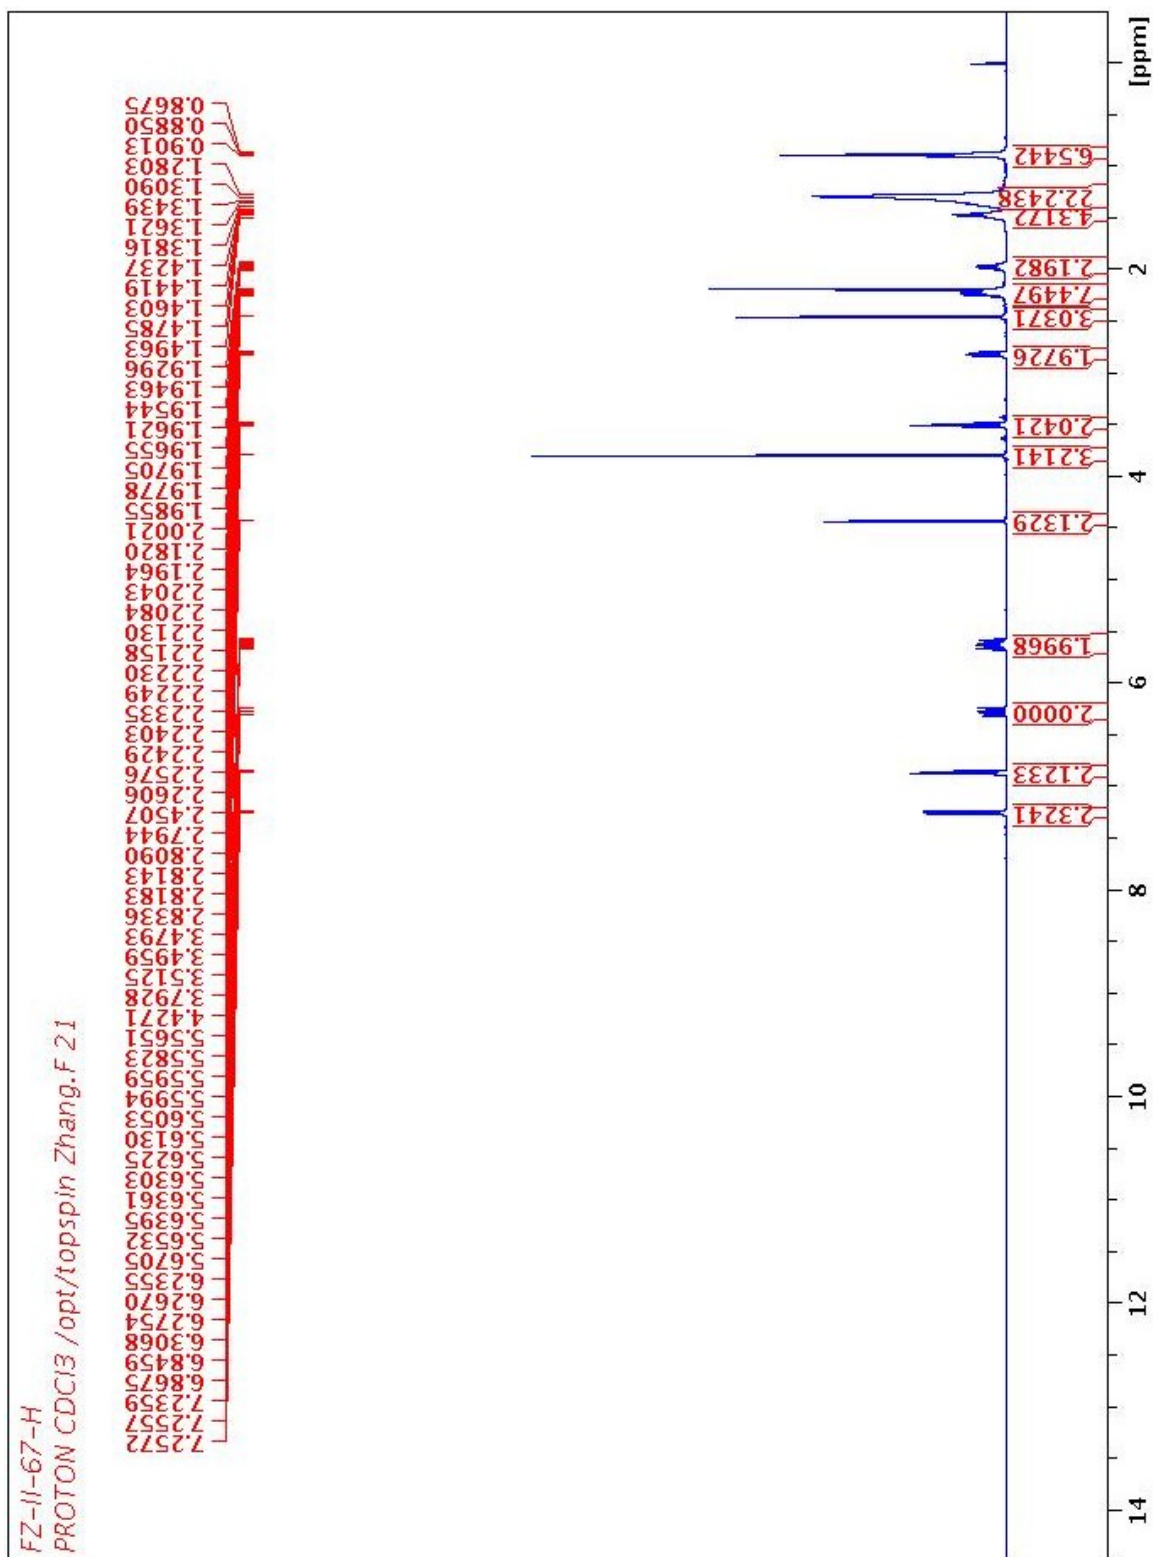

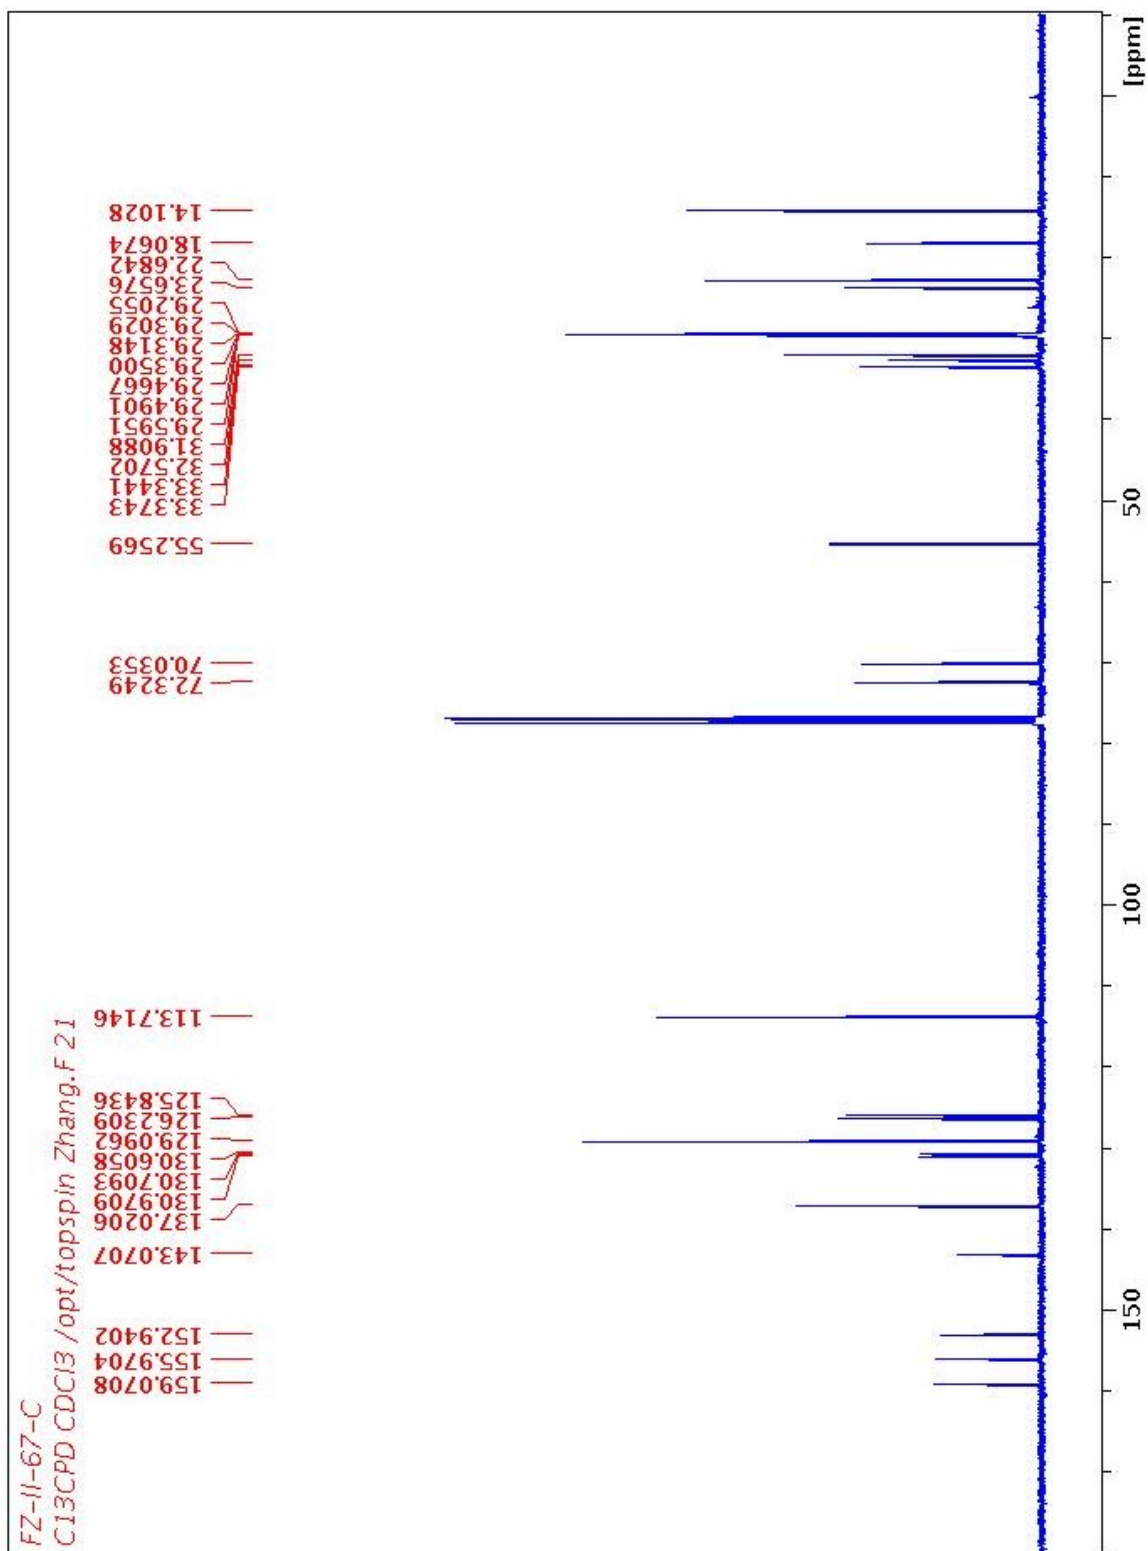



r110809r07 #1-49 RT: 0.01-0.68 AV: 49 NL: 4.47E8  
T: FTMS + p NSI Full ms [300.00-1500.00]

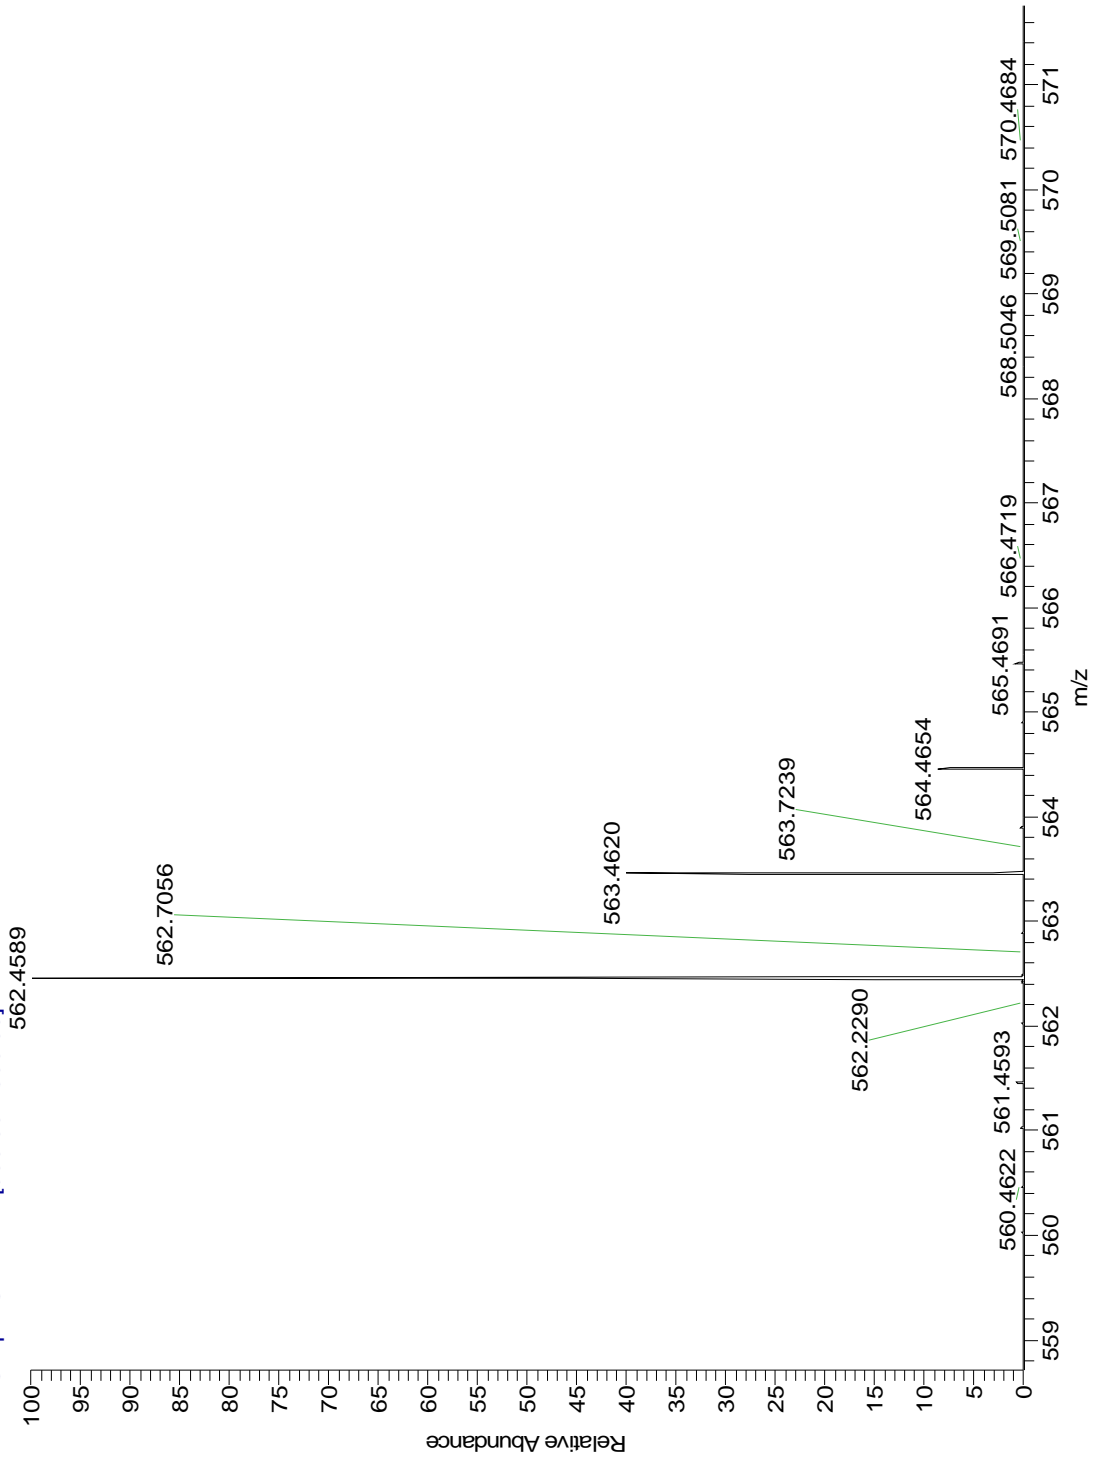

Thu Apr 14 17:59:41 2011 (G

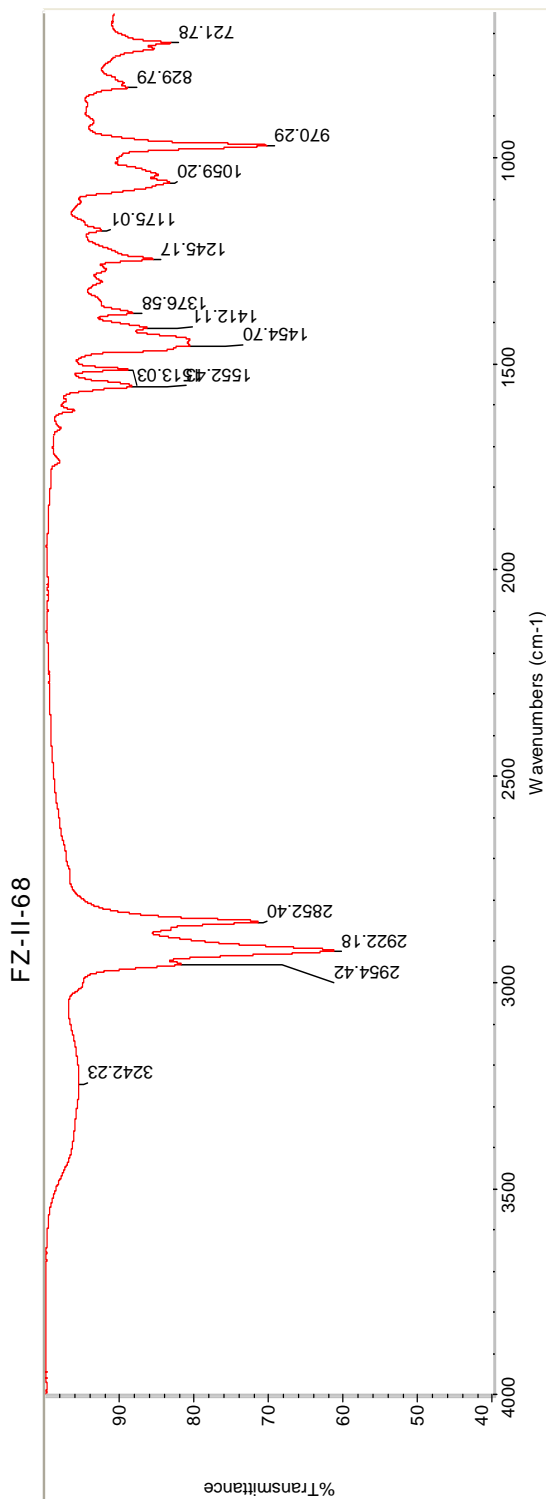

Thu Apr 14 17:59:37 2011 (GMT-04:00)

Number of sample scans: 16  
Number of background scans: 16  
Resolution: 4.000  
Sample gain: 1.0  
Optical velocity: 0.4747  
Aperture: 80.00

FIND PEAKS:  
Spectrum: FZ-II-68  
Region: 4000.12 649.89  
Absolute threshold: 95.383  
Sensitivity: 50  
Peak list:  
Position: 721.78 Intensity:  
Position: 829.79 Intensity:  
Position: 970.29 Intensity:  
Position: 1059.20 Intensity:  
Position: 1175.01 Intensity:  
Position: 1245.17 Intensity:  
Position: 1376.58 Intensity:

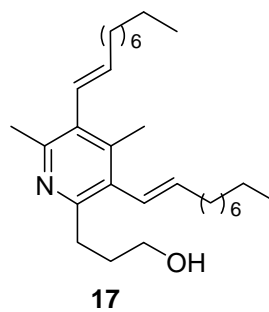

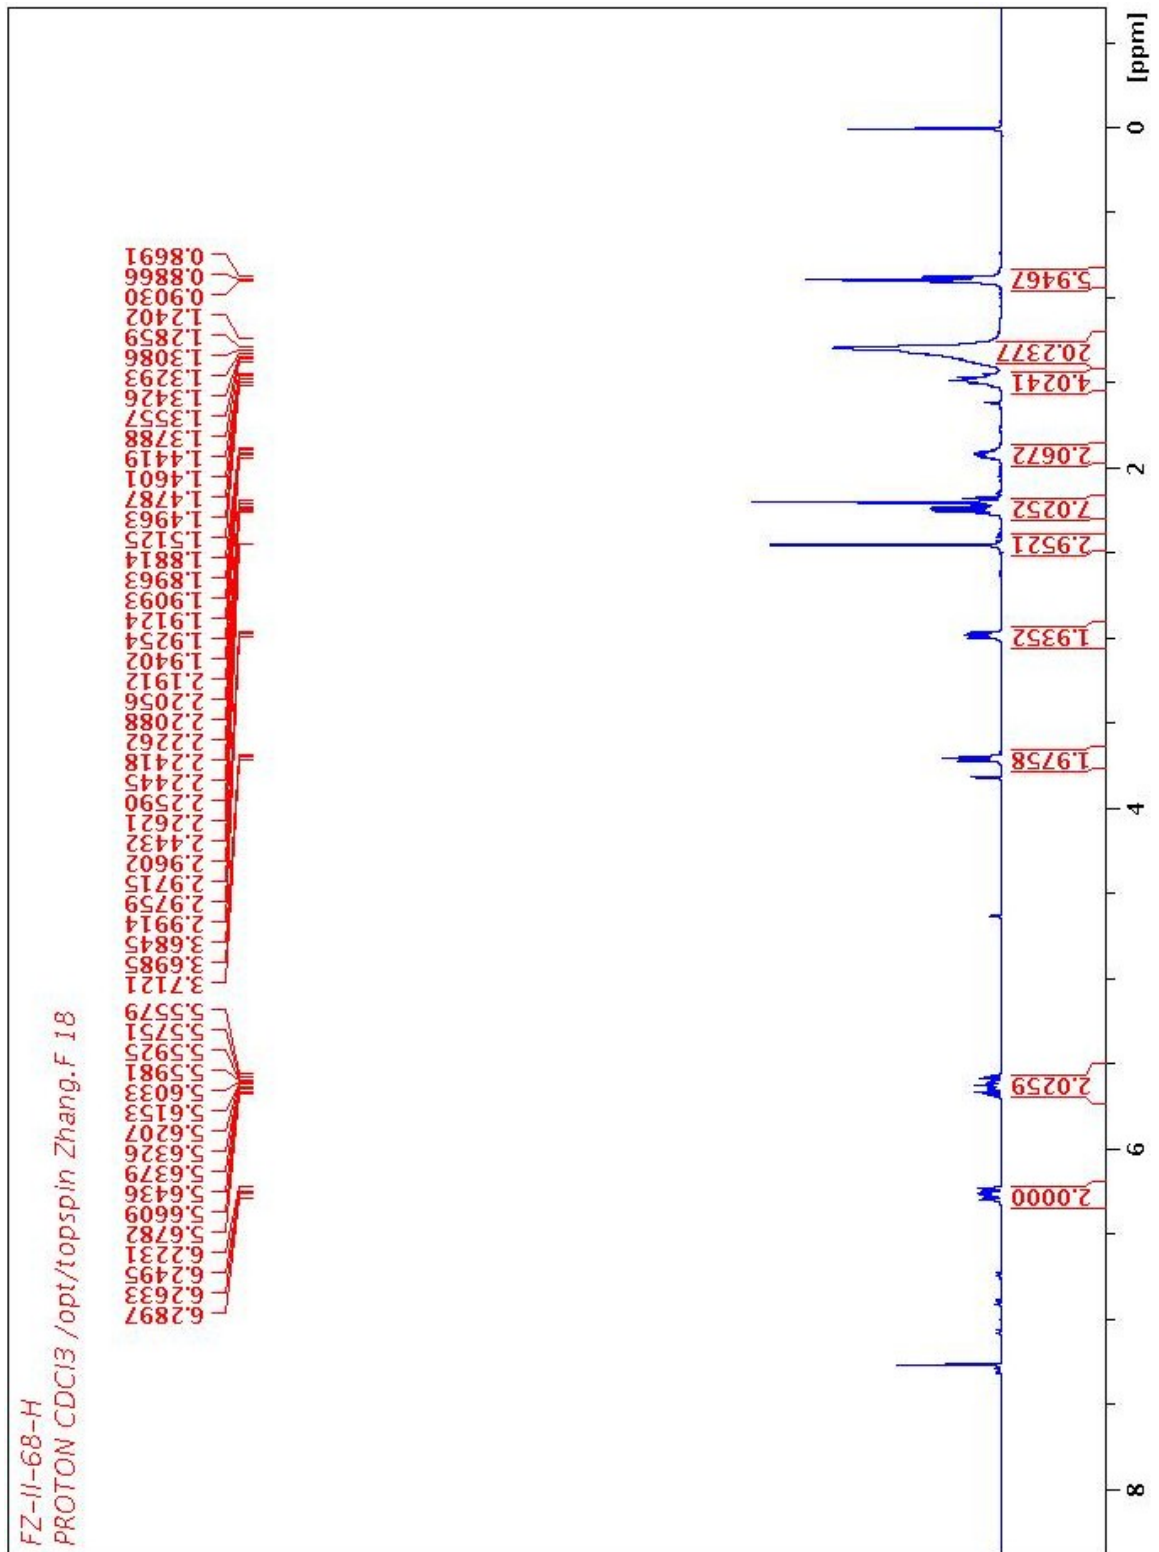

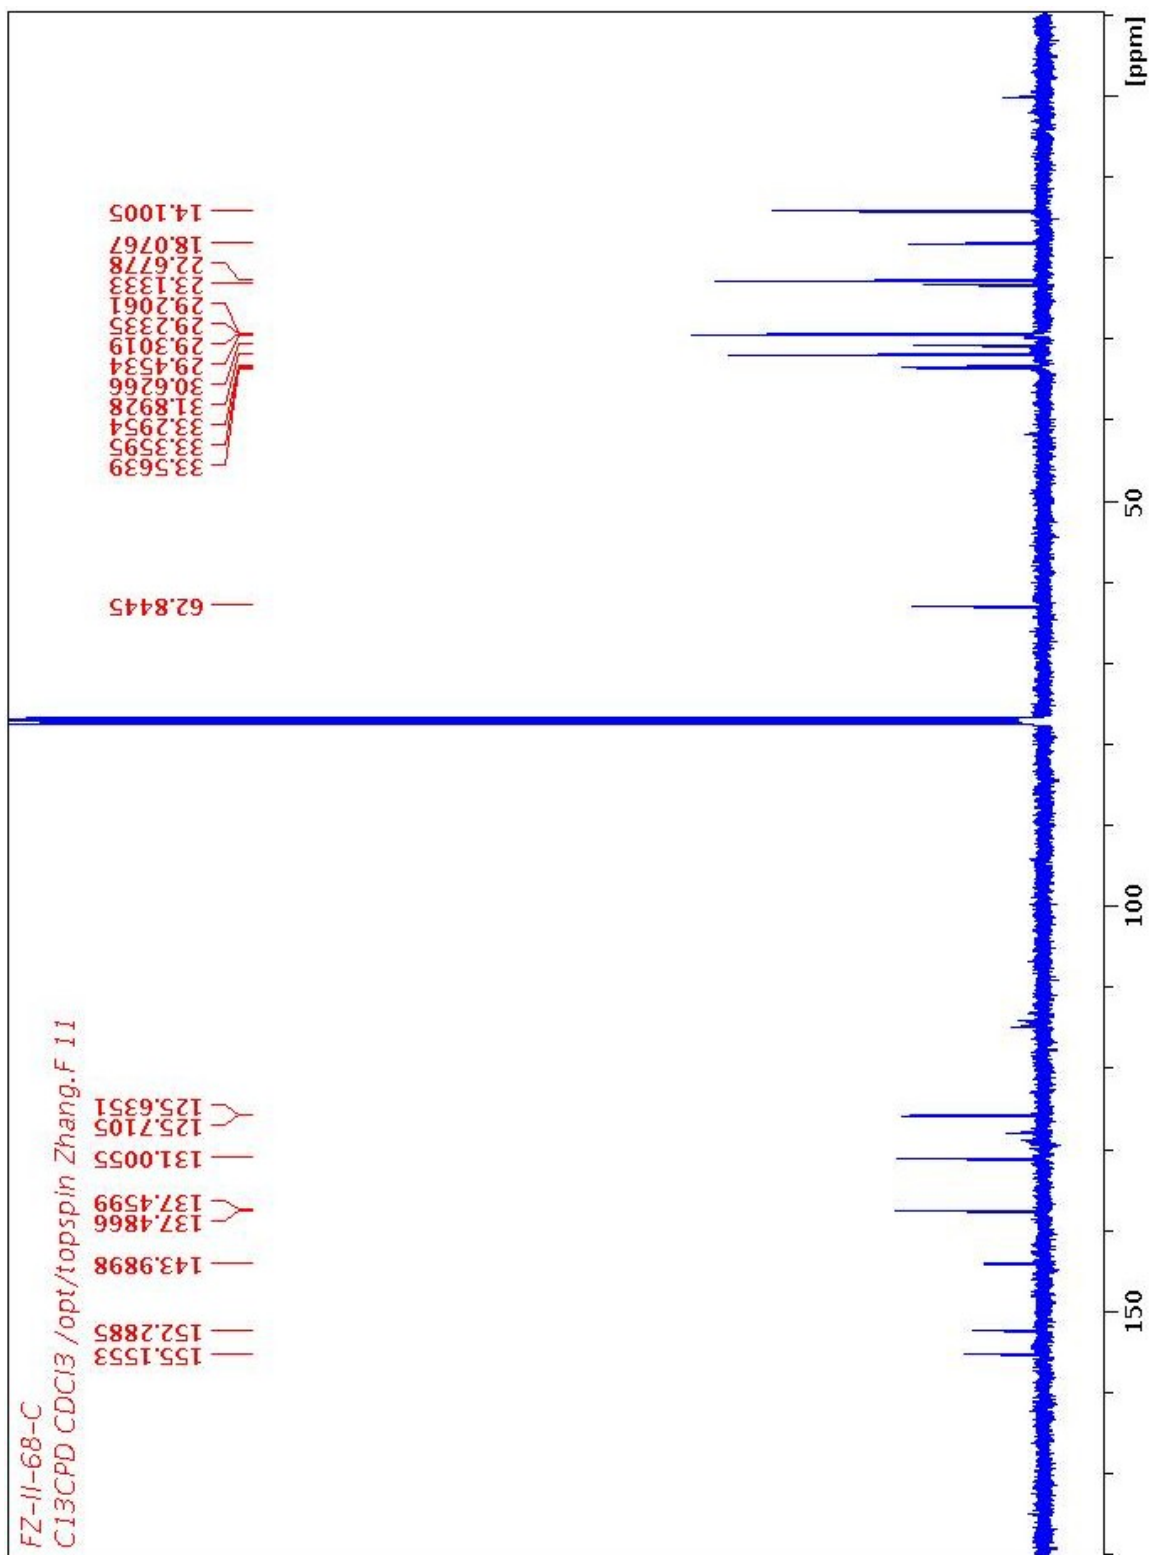

r110809r08 #22-50 RT: 0.29-0.68 AV: 29 NL: 6.59E8  
T: FTMS + p NSIFull ms [300.00-1500.00]

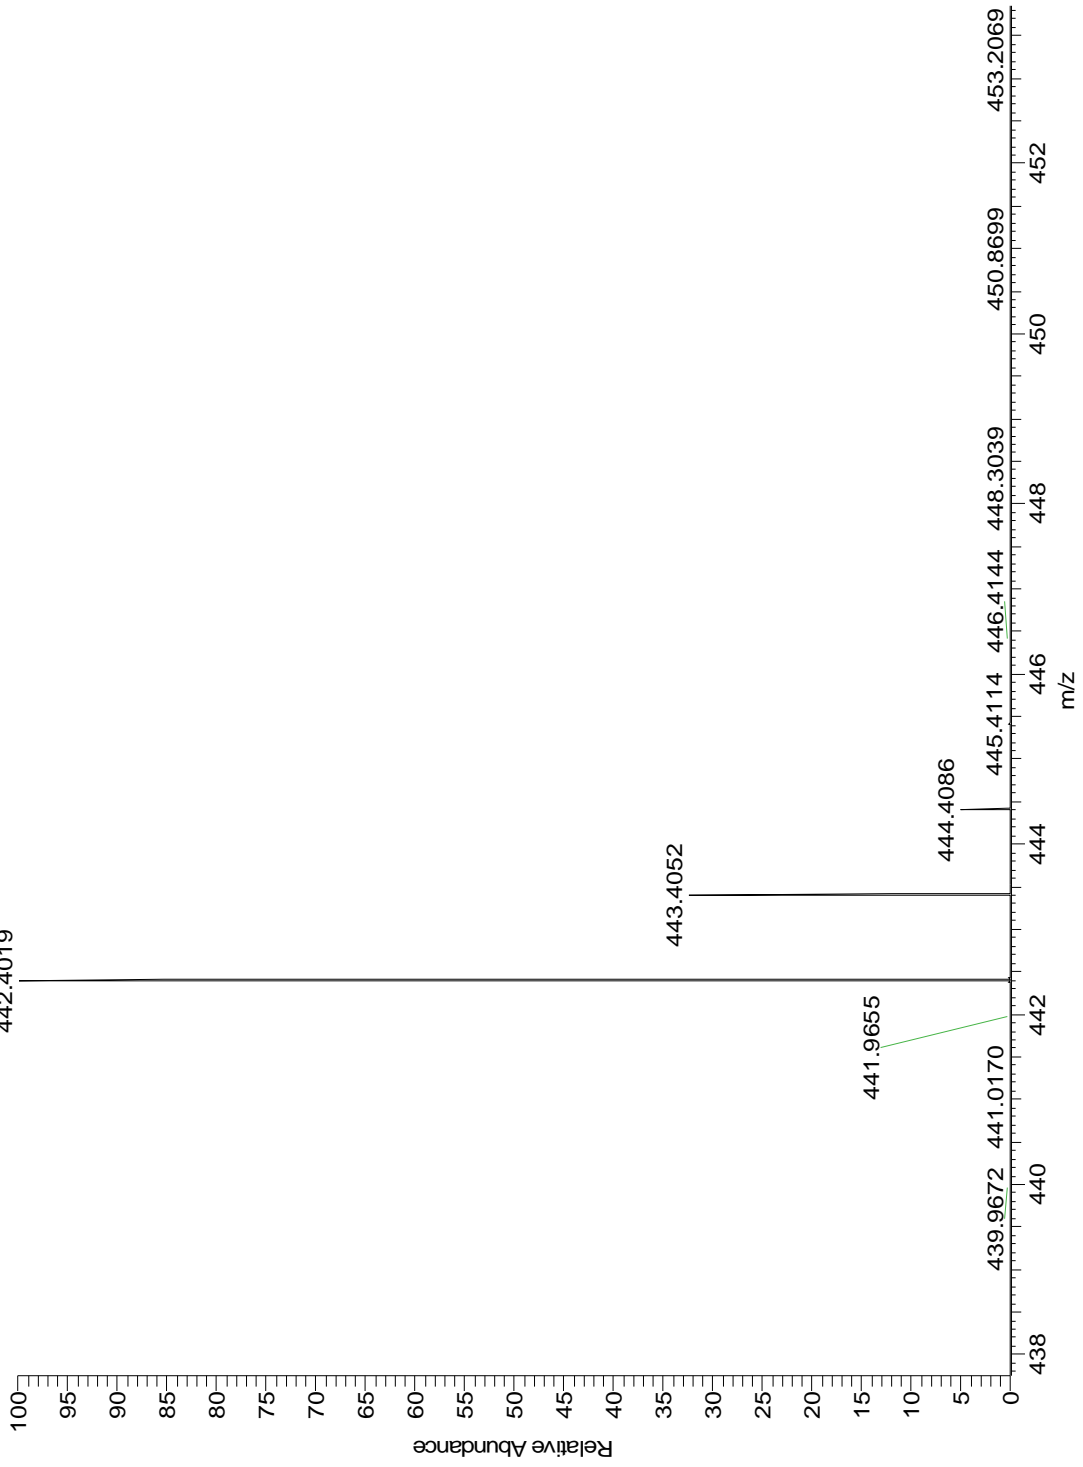

Thu Apr 14 18:00:17 2011 (G

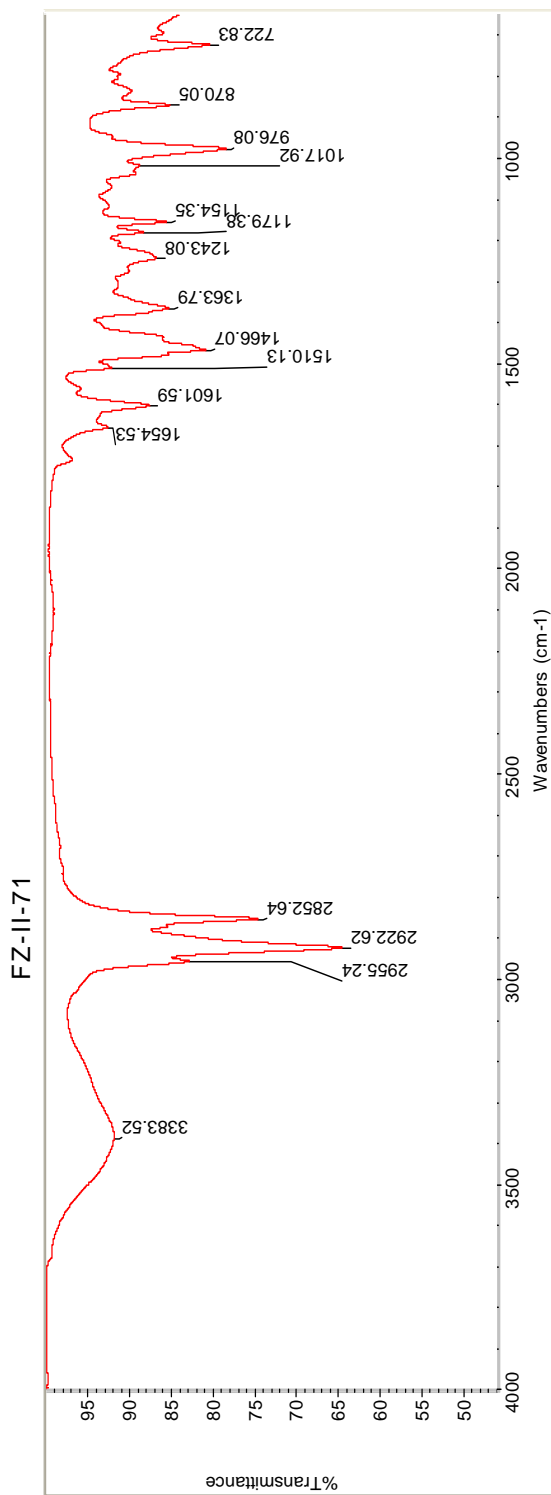

Thu Apr 14 18:00:11 2011 (GMT-04:00)

Number of sample scans: 16  
Number of background scans: 16  
Resolution: 4.000  
Sample gain: 1.0  
Optical velocity: 0.4747  
Aperture: 80.00

FIND PEAKS:  
Spectrum: FZ-II-71  
Region: 4000.12 649.89  
Absolute threshold: 98.696  
Sensitivity: 50  
Peak list:  
Position: 722.83 Intensity:  
Position: 870.05 Intensity:  
Position: 976.08 Intensity:  
Position: 1017.92 Intensity:  
Position: 1154.35 Intensity:  
Position: 1179.38 Intensity:  
Position: 1243.08 Intensity:

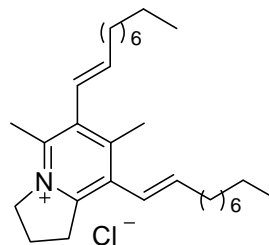

2 (11E,22E)

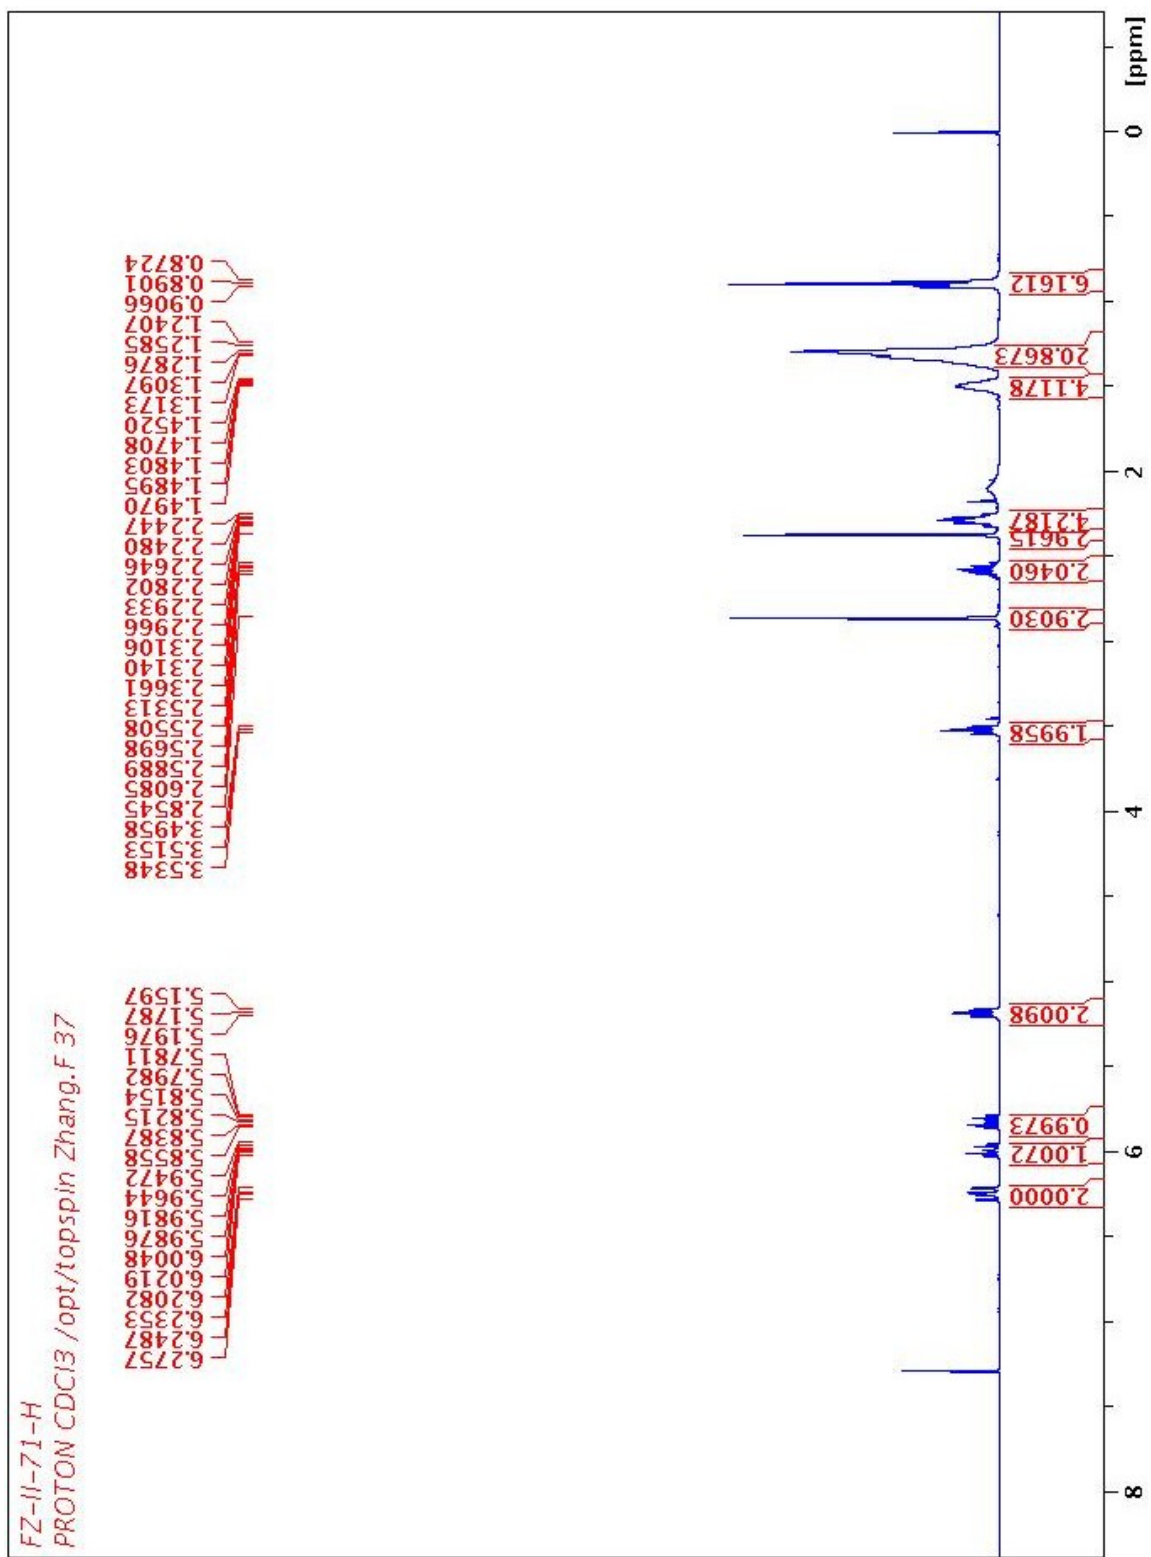

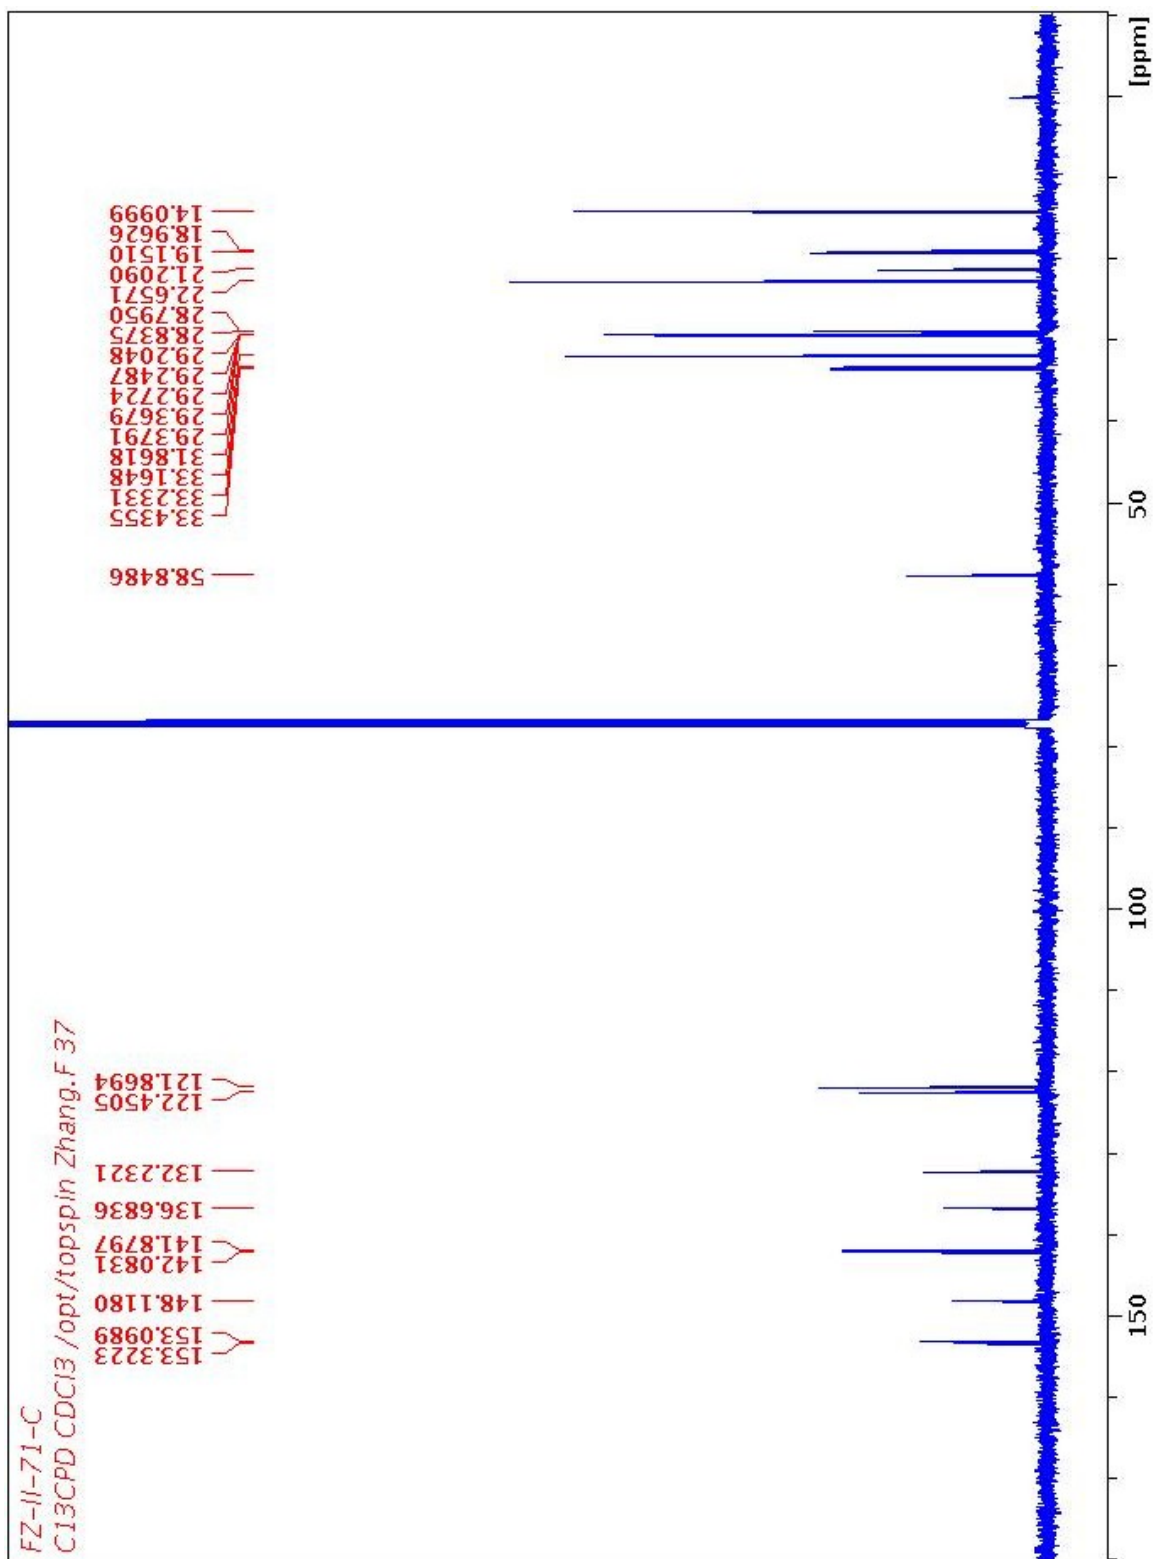



Thu Apr 14 18:05:29 2011 (G

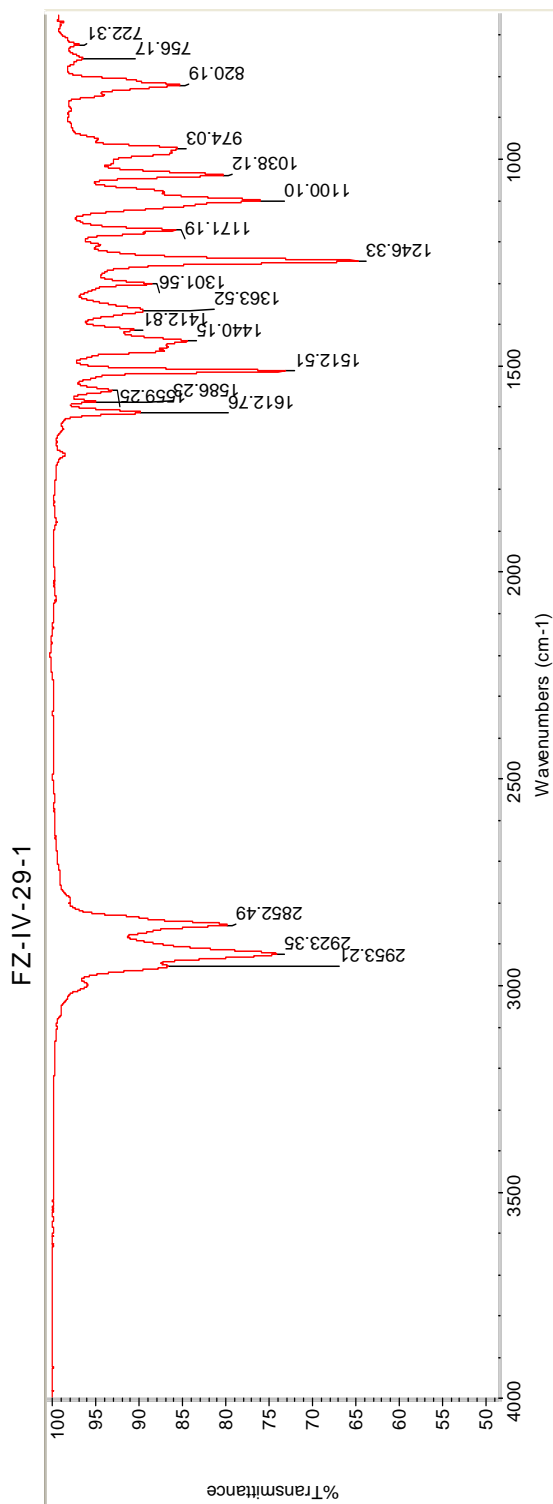

Thu Apr 14 18:05:20 2011 (GMT-04:00)

Number of sample scans: 16  
Number of background scans: 16  
Resolution: 4.000  
Sample gain: 1.0  
Optical velocity: 0.4747  
Aperture: 80.00

Find Peaks:  
Spectrum: FZ-IV-29-1  
Region: 4000.12 649.89  
Absolute threshold: 97.767  
Sensitivity: 59  
Peak list:  
Position: 722.31 Intensity: Intensive  
Position: 756.17 Intensity: Intensive  
Position: 820.19 Intensity: Intensive  
Position: 974.03 Intensity: Intensive  
Position: 1038.12 Intensity: Intensive  
Position: 1100.10 Intensity: Intensive  
Position: 1171.19 Intensity: Intensive

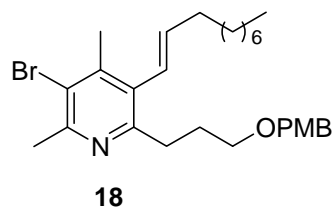

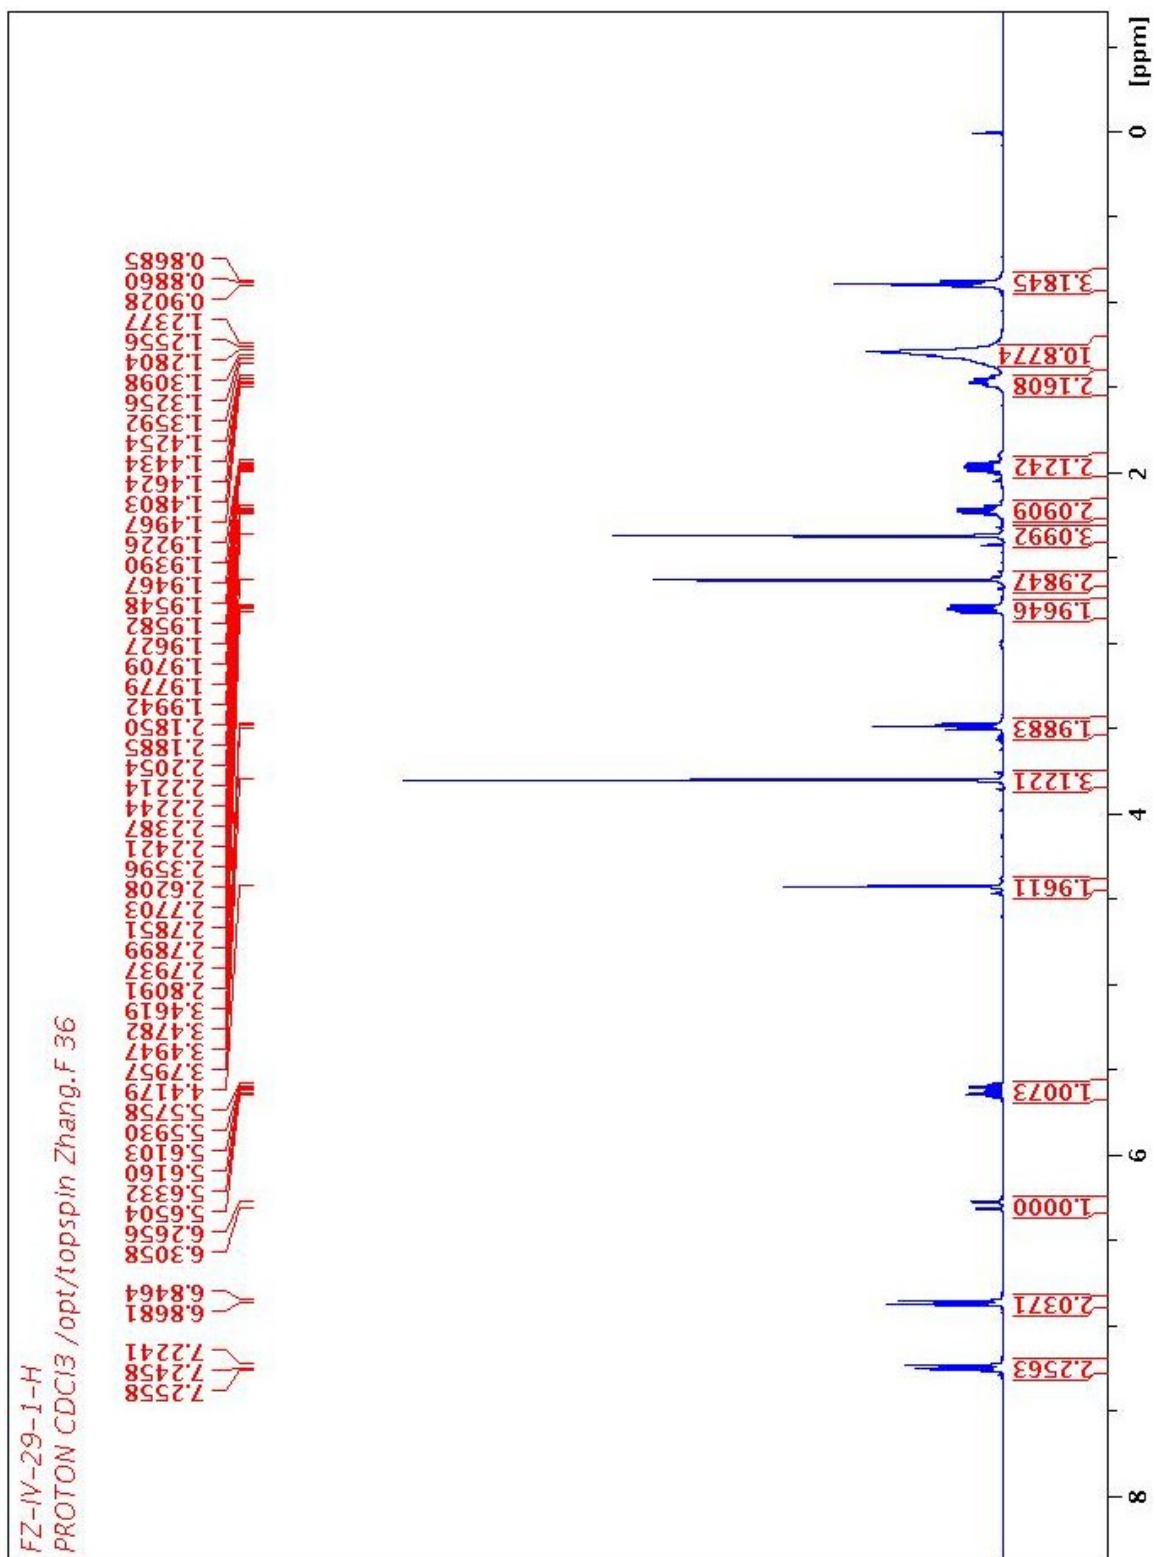

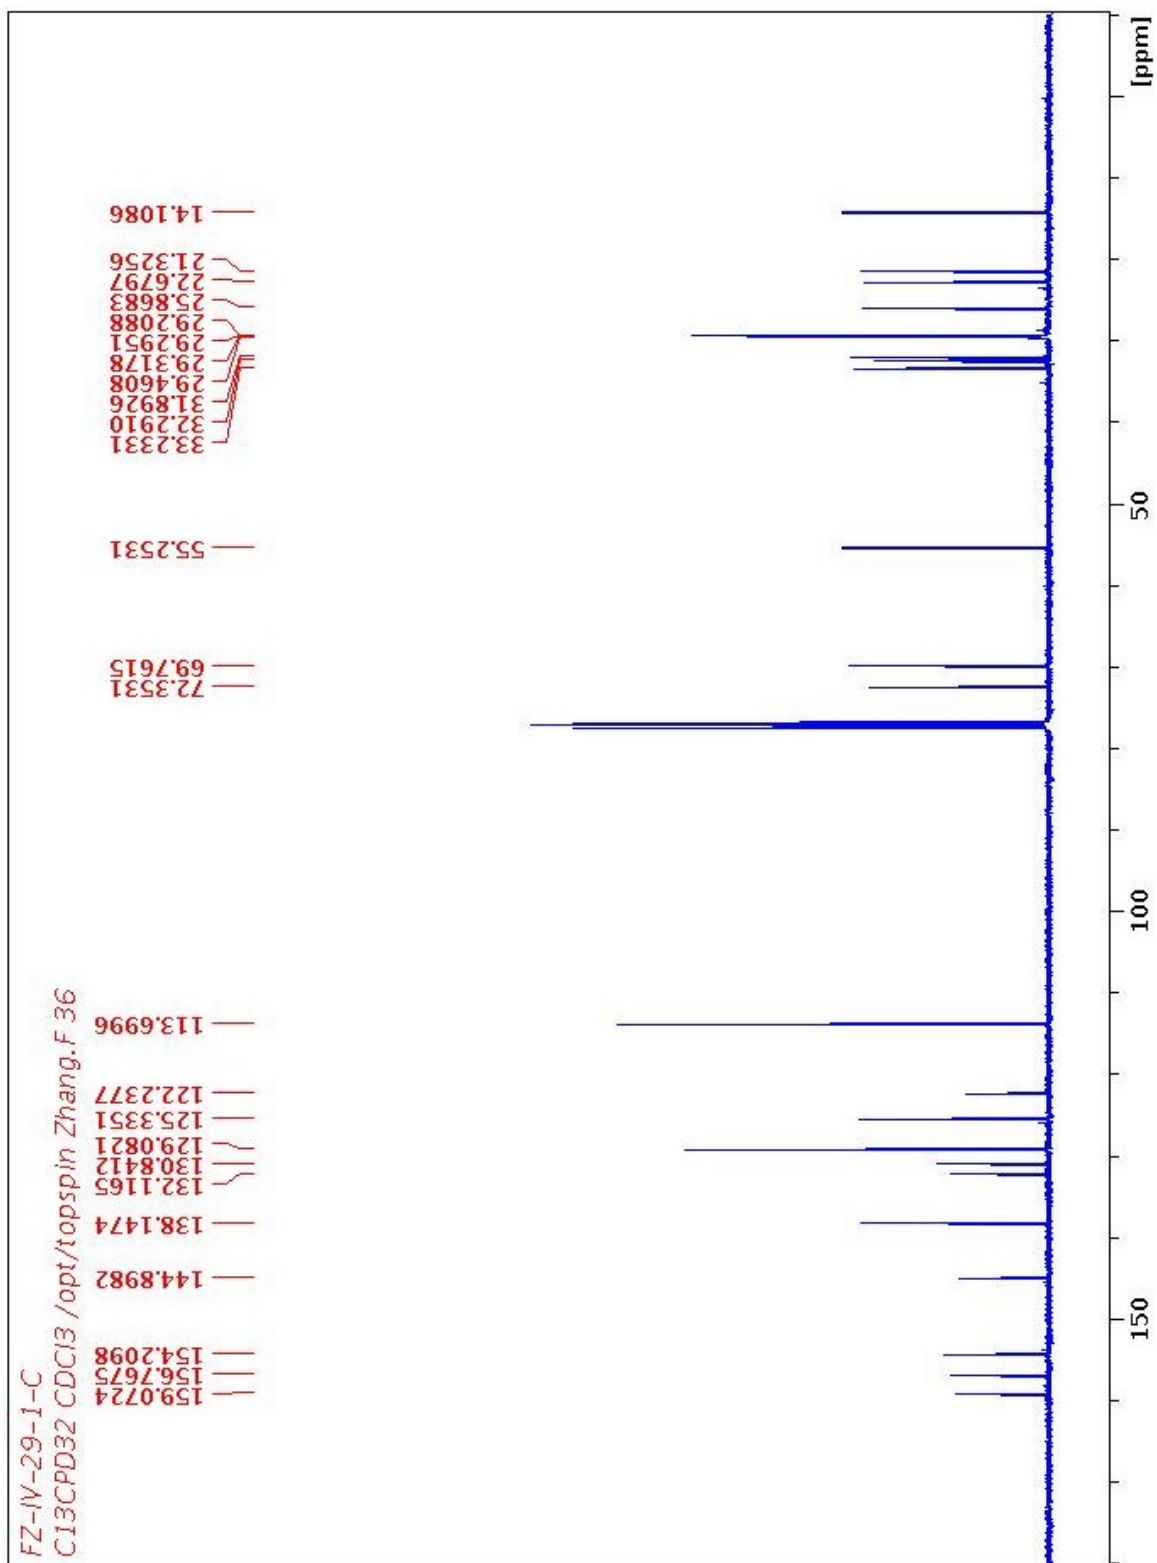

r11080909 #4-49 RT: 0.04-0.67 AV: 46 NL: 2.18E8  
T: FTMS + p NSI Full ms [300.00-1500.00]

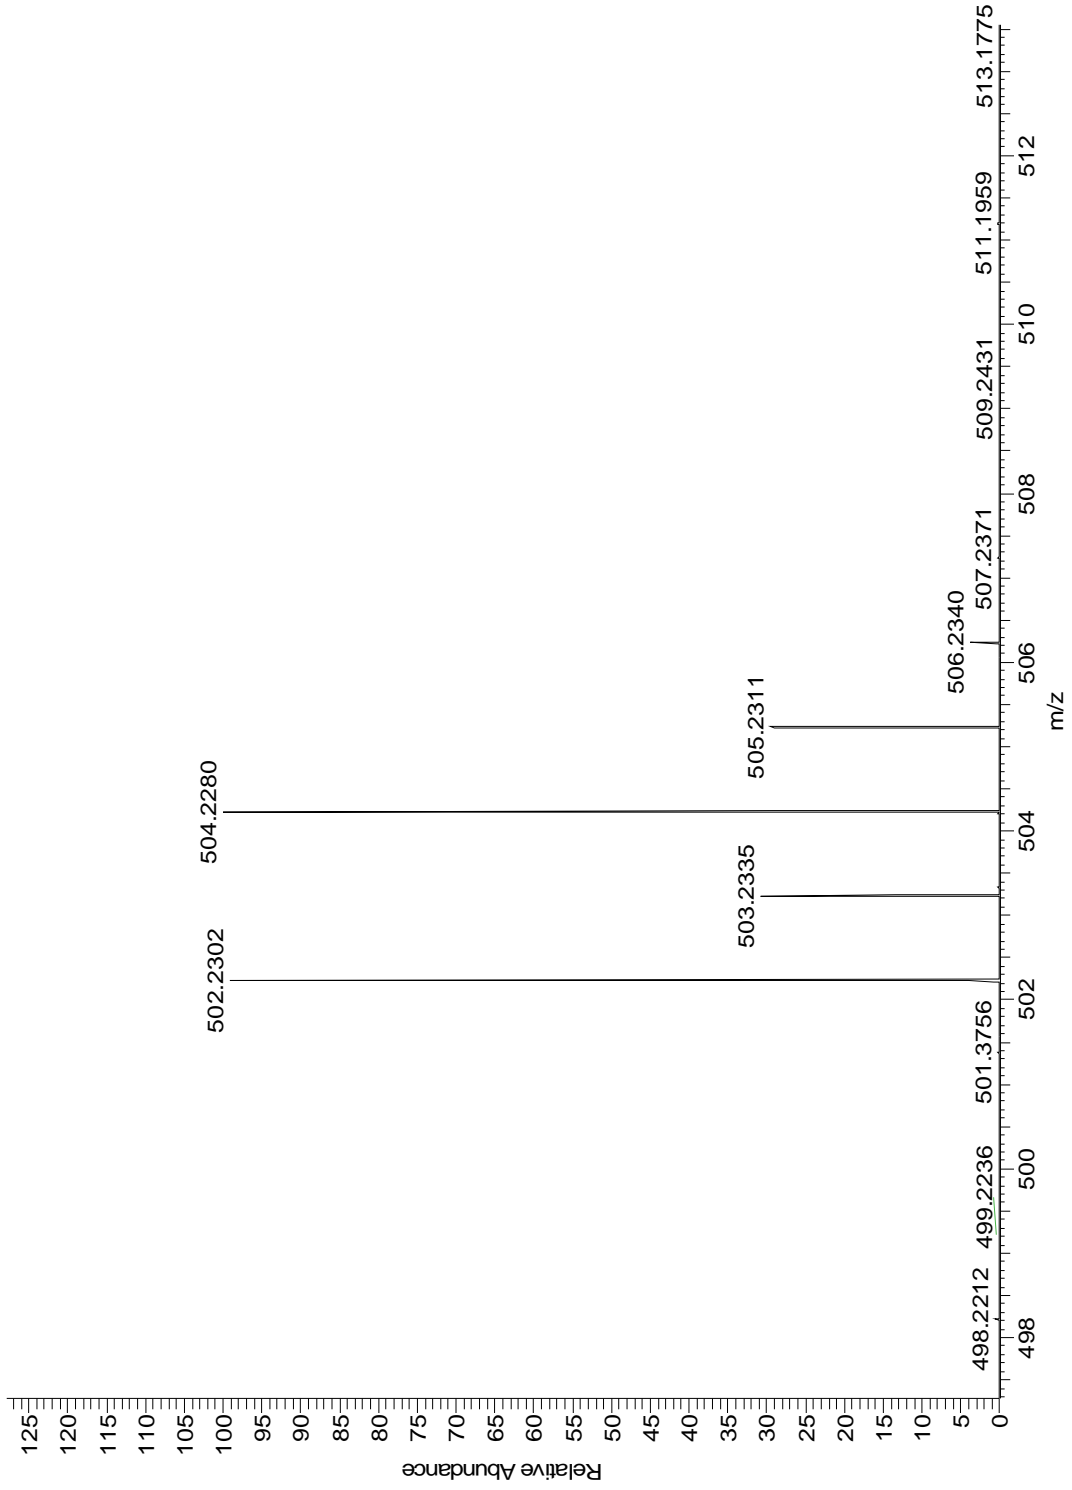

Thu Apr 14 18:02:39 2011 (G

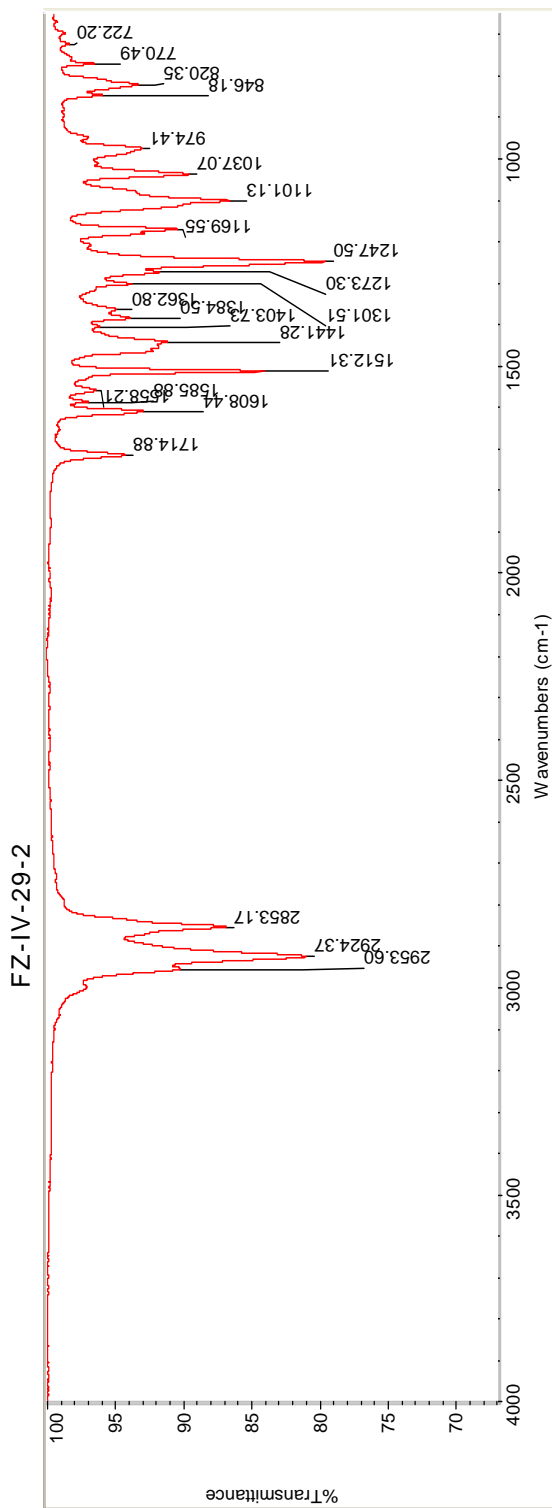

Thu Apr 14 18:02:35 2011 (GMT-04:00)

Number of sample scans: 16  
Number of background scans: 16  
Resolution: 4.000  
Sample gain: 1.0  
Optical velocity: 0.4747  
Aperture: 80.00

FIND PEAKS:  
Spectrum: FZ-IV-29-2  
Region: 4000.12 649.89  
Absolute threshold: 98.848  
Sensitivity: 55  
Peak list:  
Position: 722.20 Intensity: Intensive  
Position: 770.49 Intensity: Intensive  
Position: 820.35 Intensity: Intensive  
Position: 846.18 Intensity: Intensive  
Position: 974.41 Intensity: Intensive  
Position: 1037.07 Intensity: Intensive  
Position: 1101.13 Intensity: Intensive

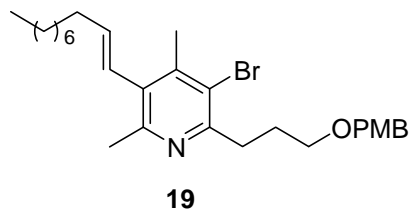

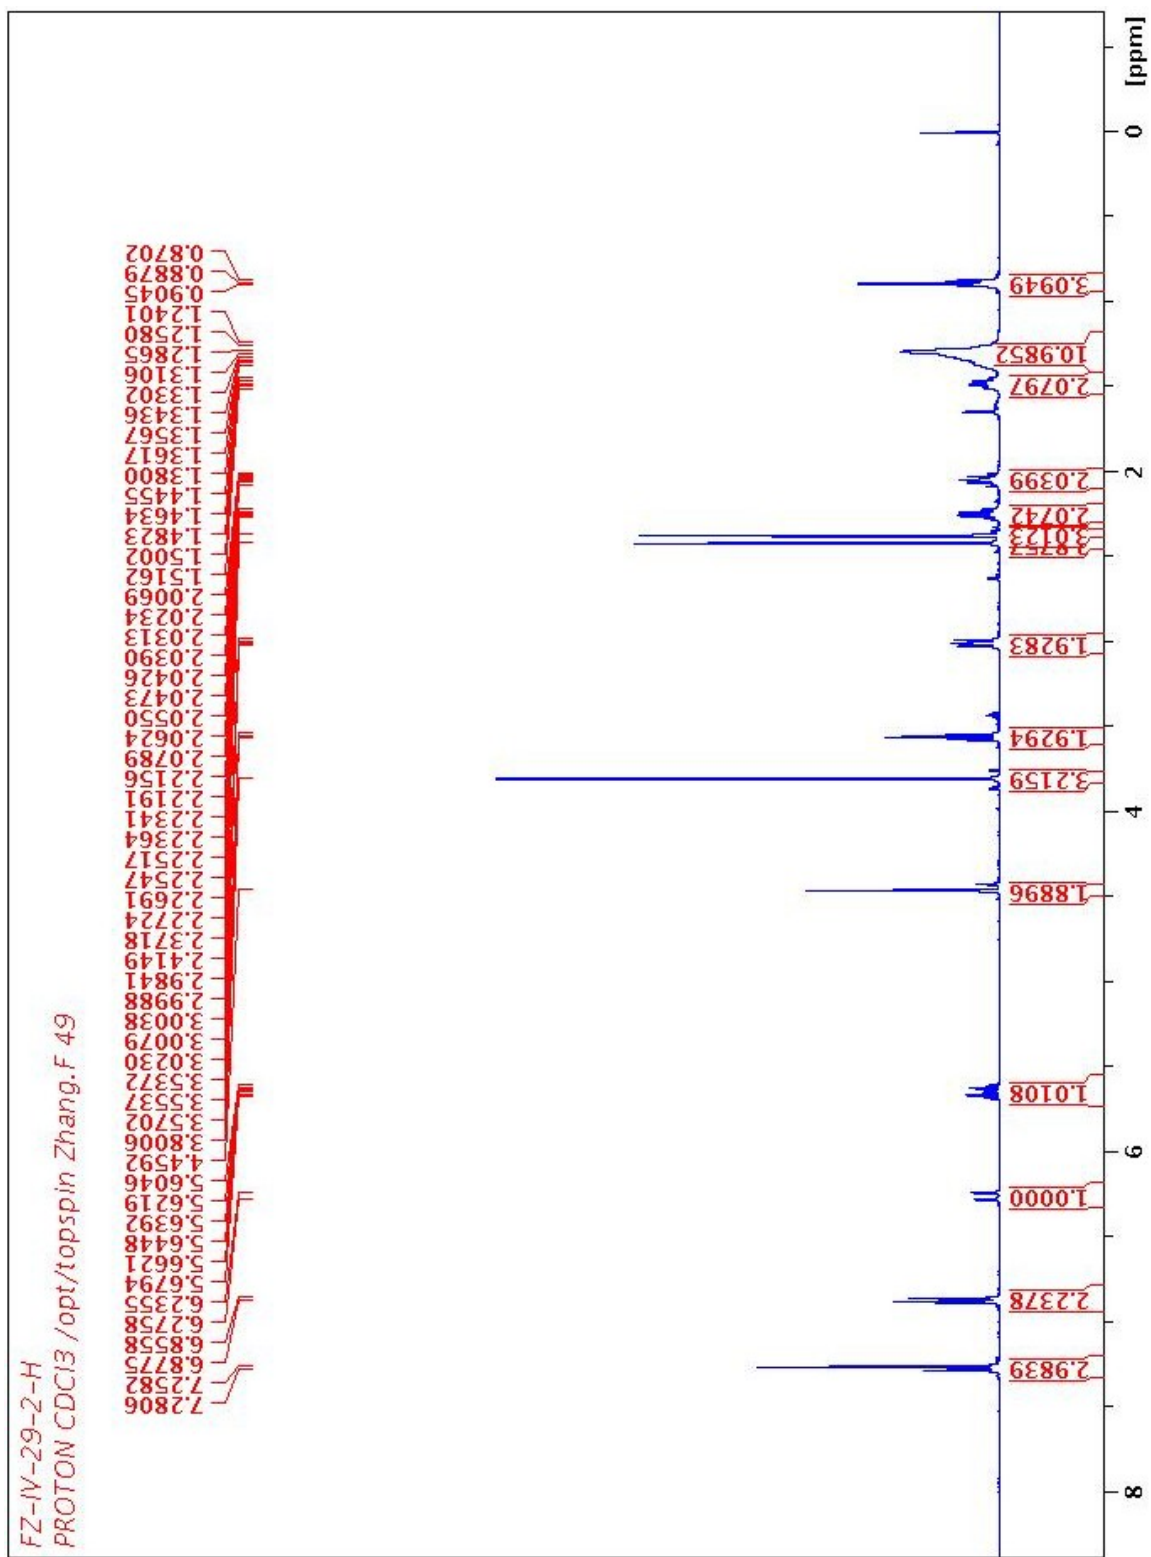

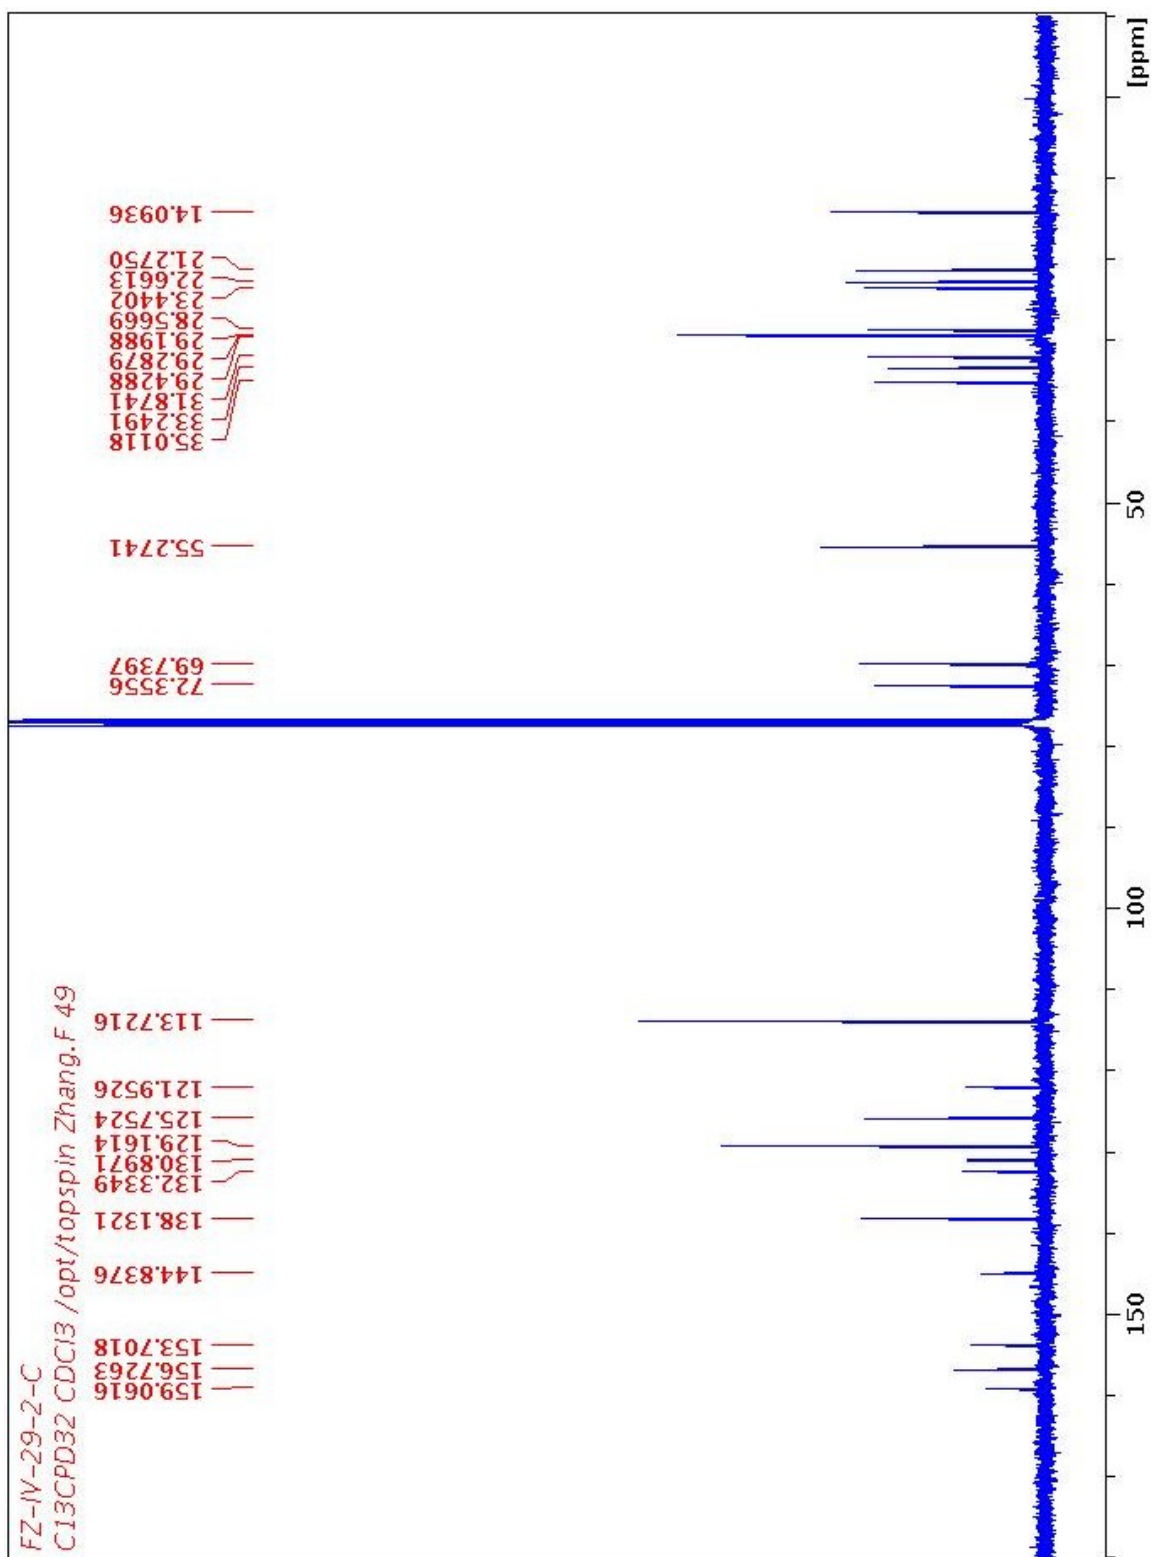

r110809r11 #5-50 RT: 0.07-0.69 AV: 46 NL: 2.14E8  
T: FTMS + p NSIFull ms [300.00-1500.00]

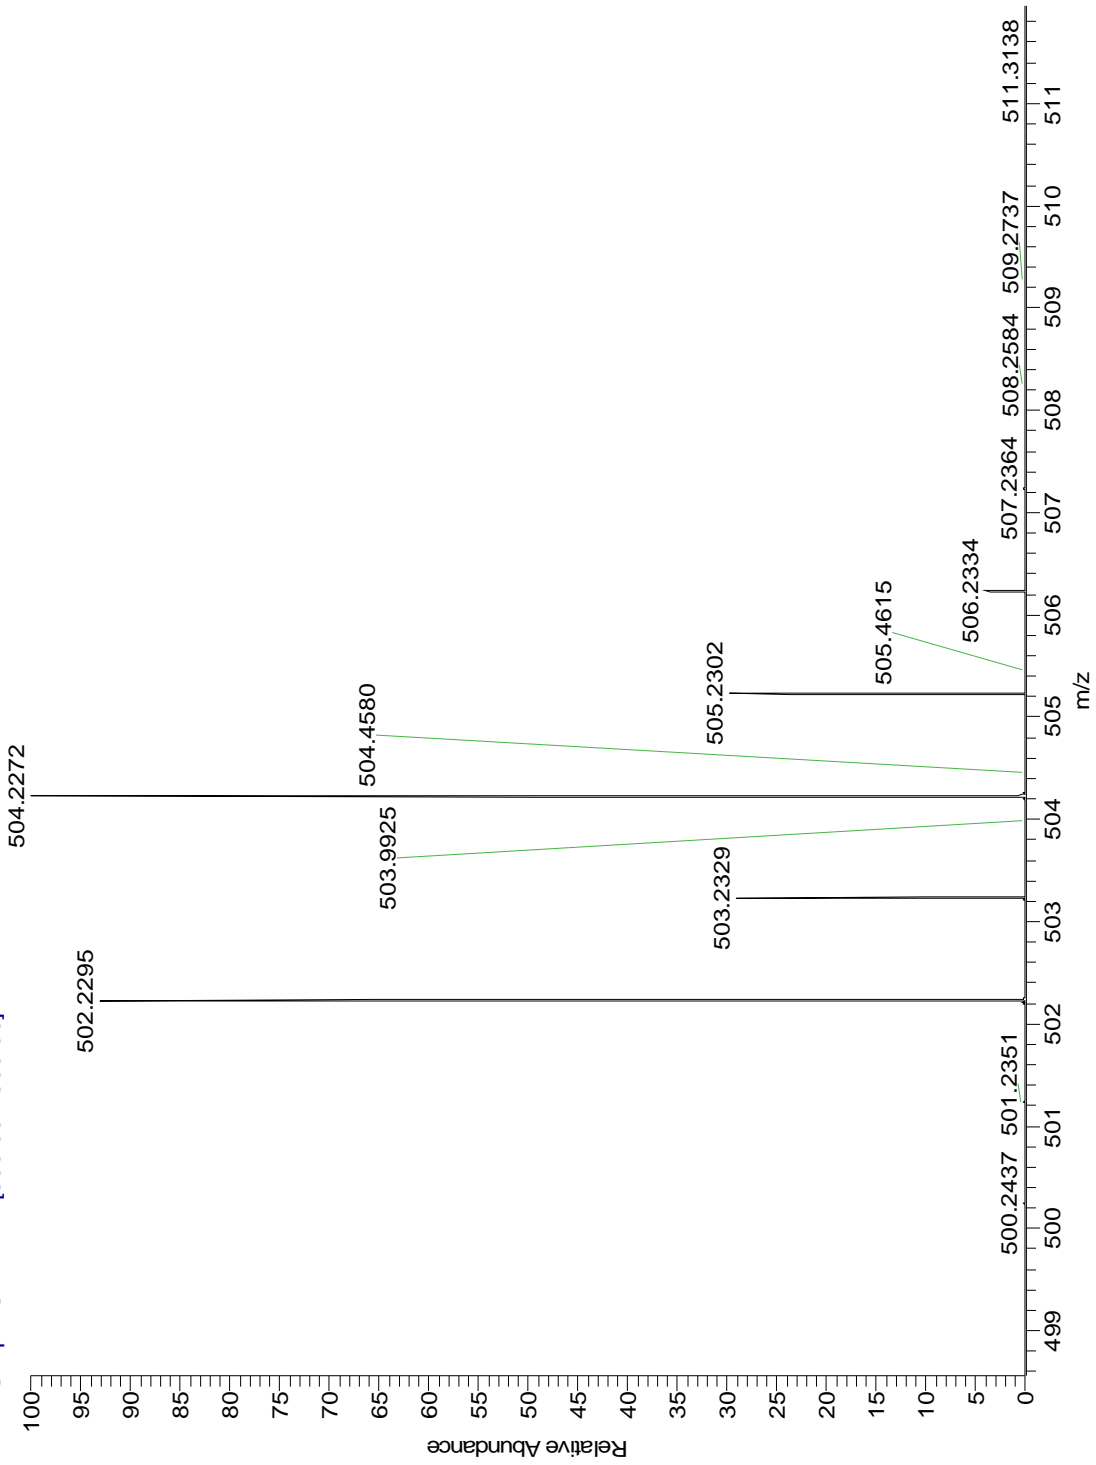



Thu Apr 14 18:06:13 2011 (G

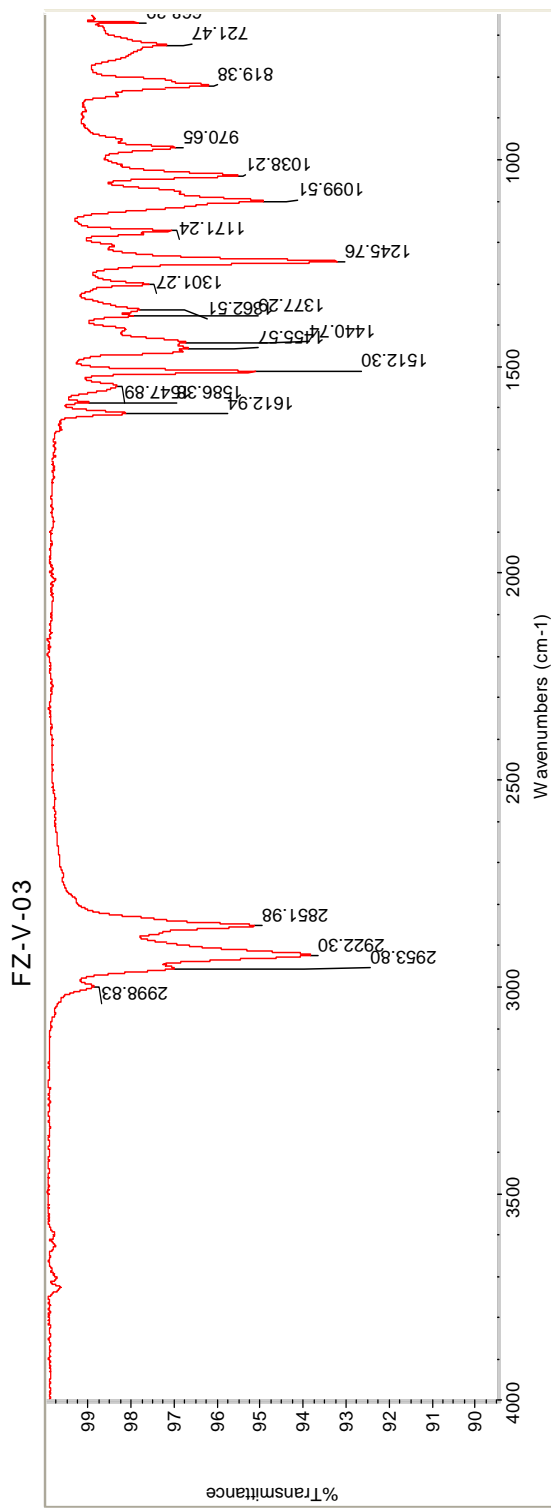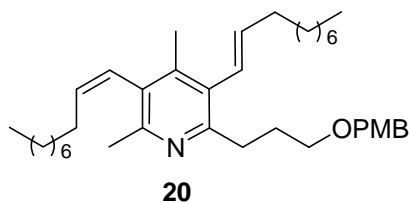

Thu Apr 14 18:06:08 2011 (GMT-04:00)

FIND PEAKS:

| Position | Intensity |
|----------|-----------|
| 668.39   | Intensiv  |
| 721.47   | Intensiv  |
| 819.38   | Intensiv  |
| 970.65   | Intensiv  |
| 1038.21  | Intensiv  |
| 1099.51  | Intensiv  |
| 1171.24  | Intensiv  |

| Position | Intensity |
|----------|-----------|
| 2998.83  | Intensiv  |
| 2953.80  | Intensiv  |
| 2922.30  | Intensiv  |
| 2851.98  | Intensiv  |

Number of sample scans: 16  
Number of background scans: 16  
Resolution: 4.000  
Sample gain: 1.0  
Optical velocity: 0.4747  
Aperture: 80.00

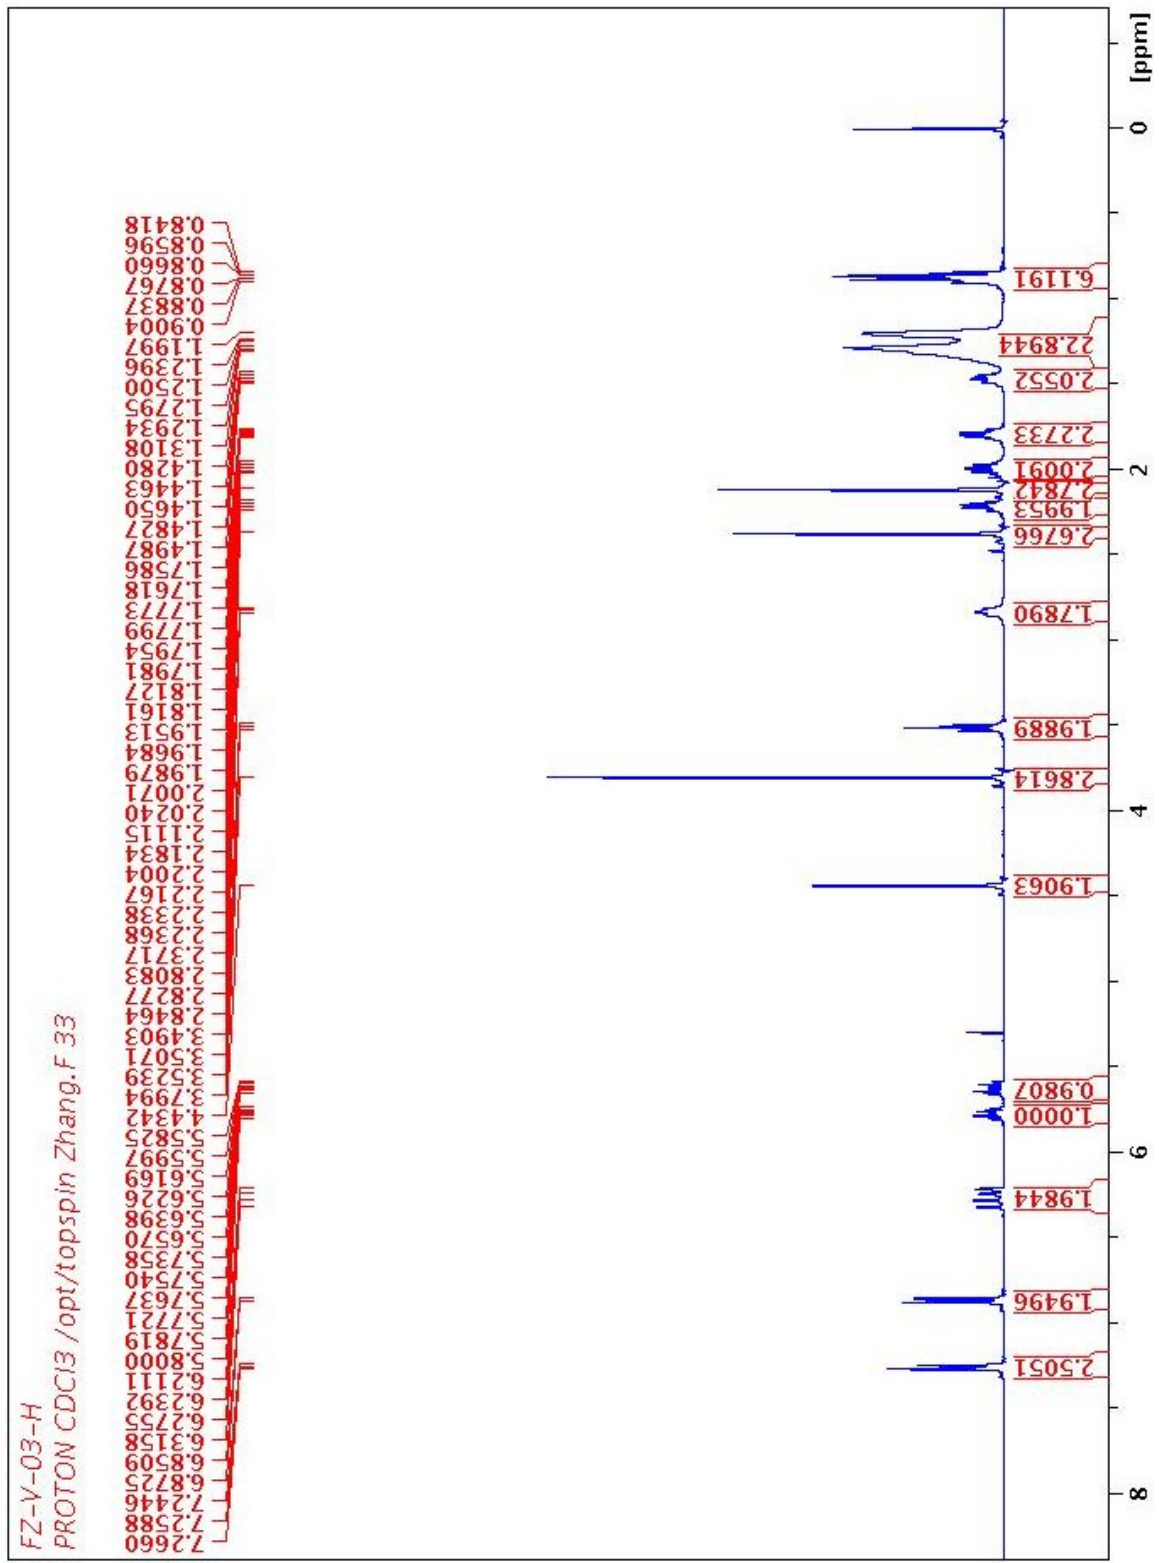

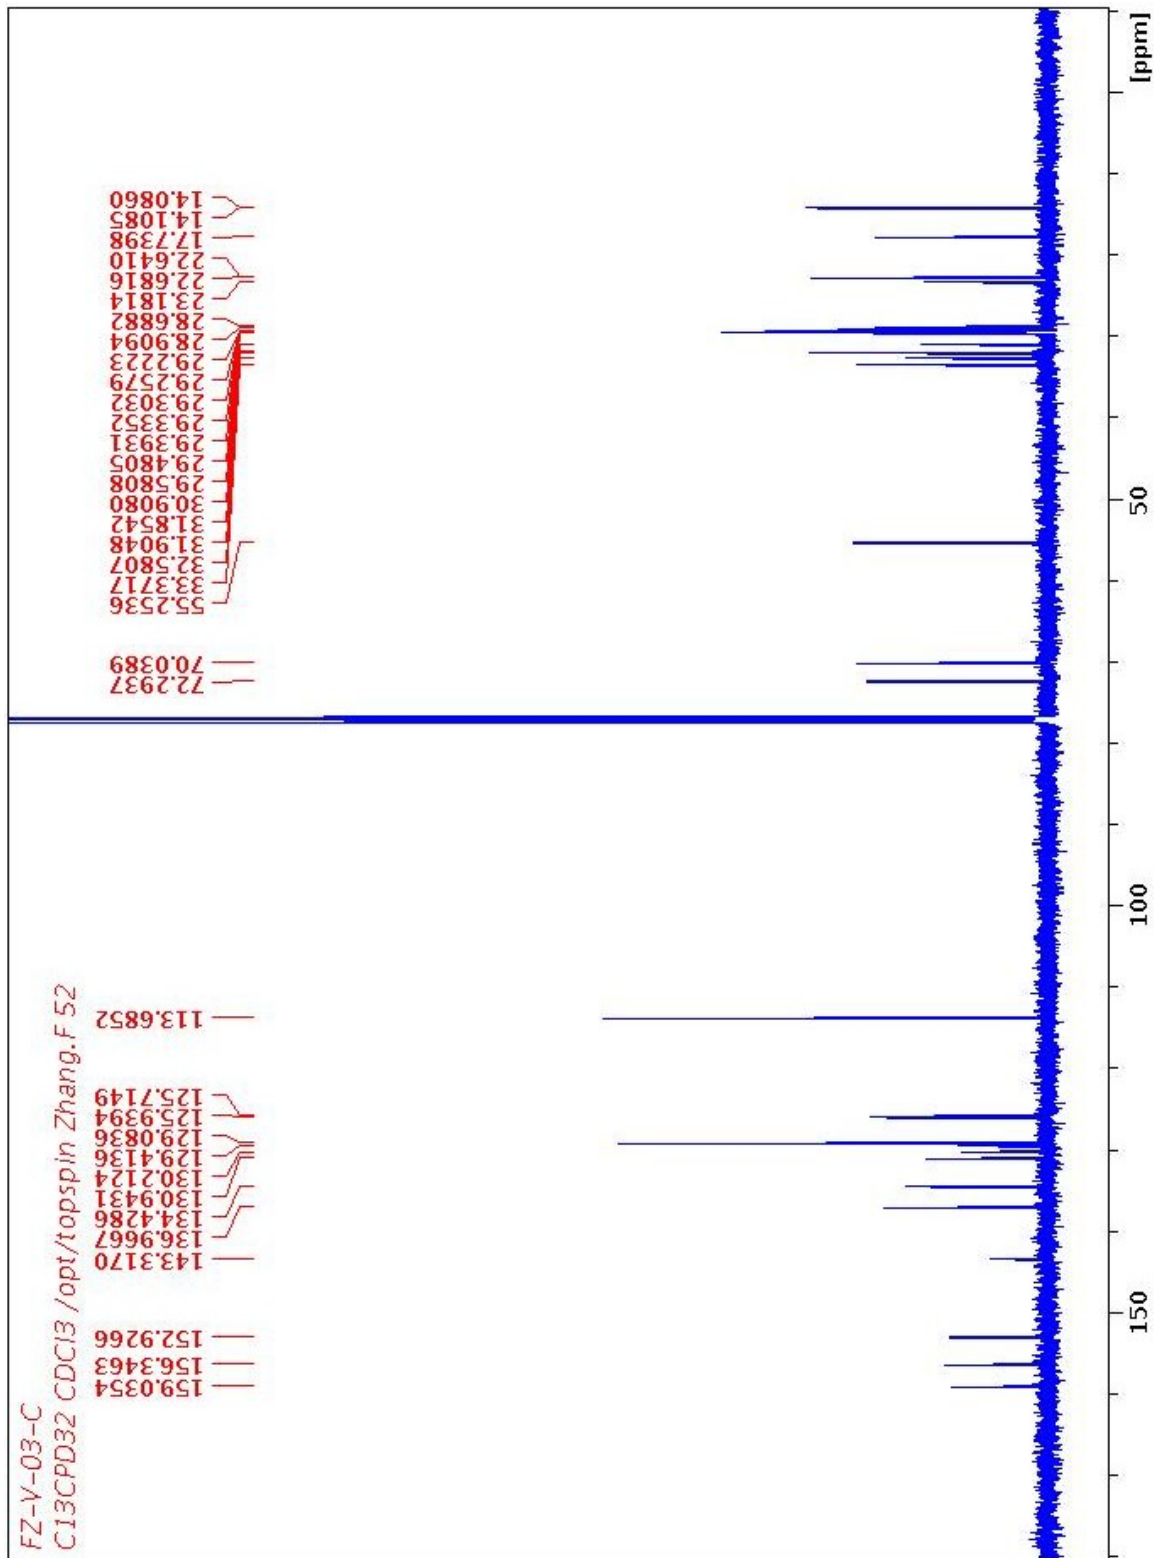

r110809r10 #7-49 RT: 0.09-0.68 AV: 43 NL: 1.09E8  
T: FTMS + p NSIFull.ms [300.00-1500.00]

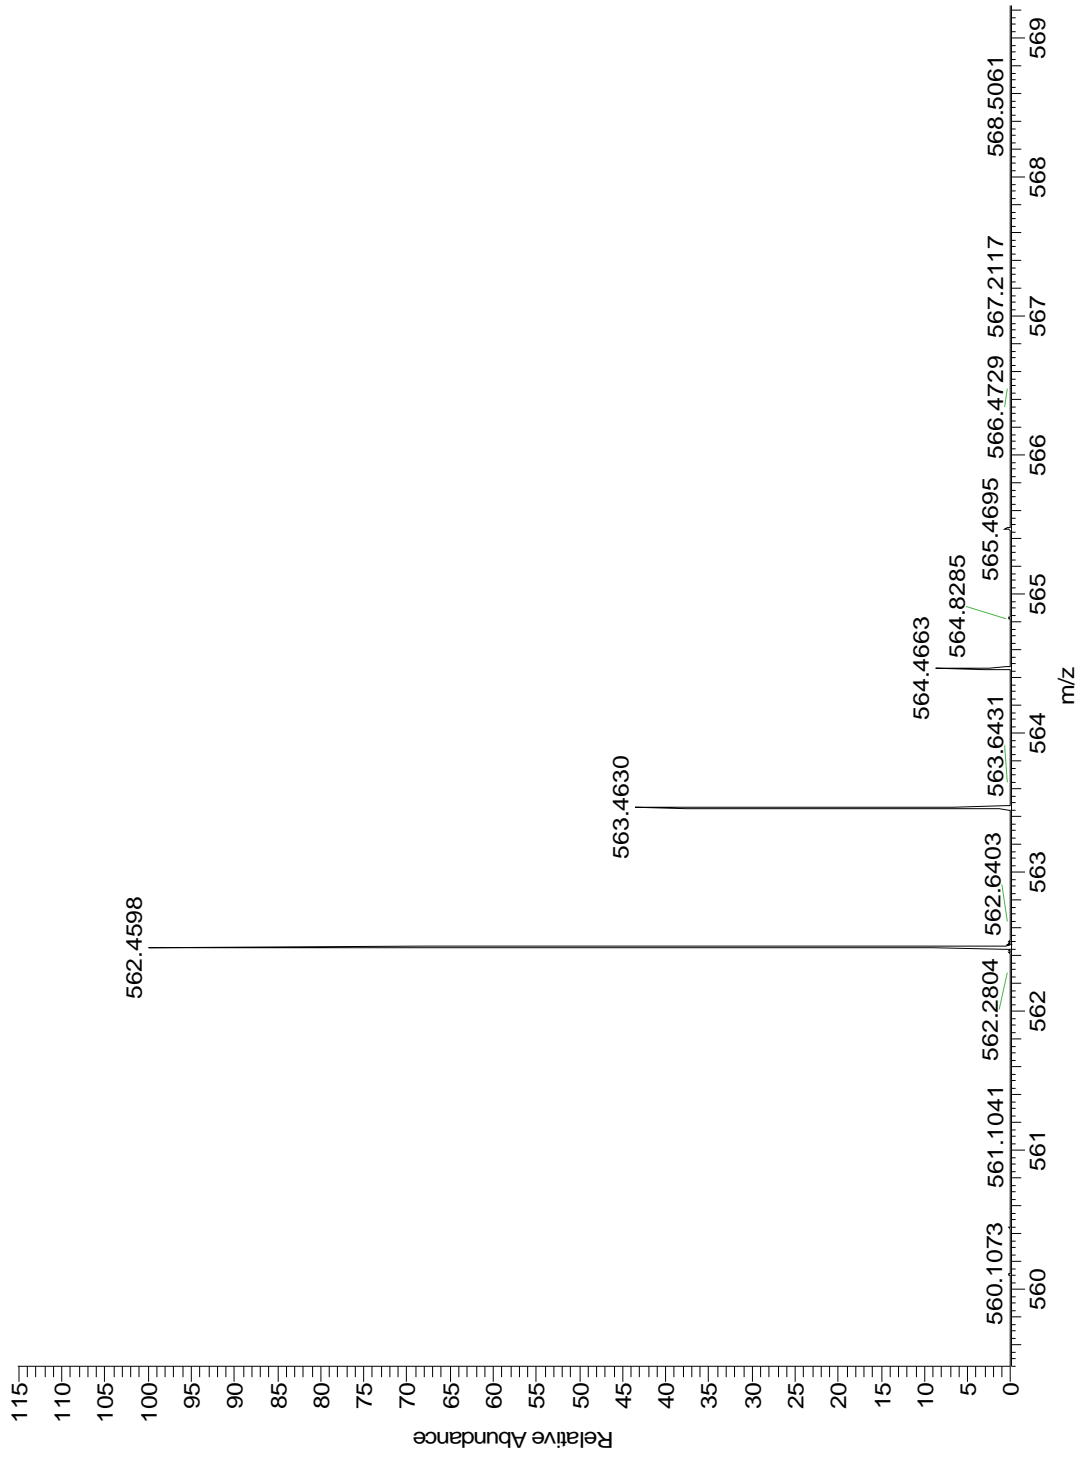

Thu Apr 14 18:06:46 2011 (G

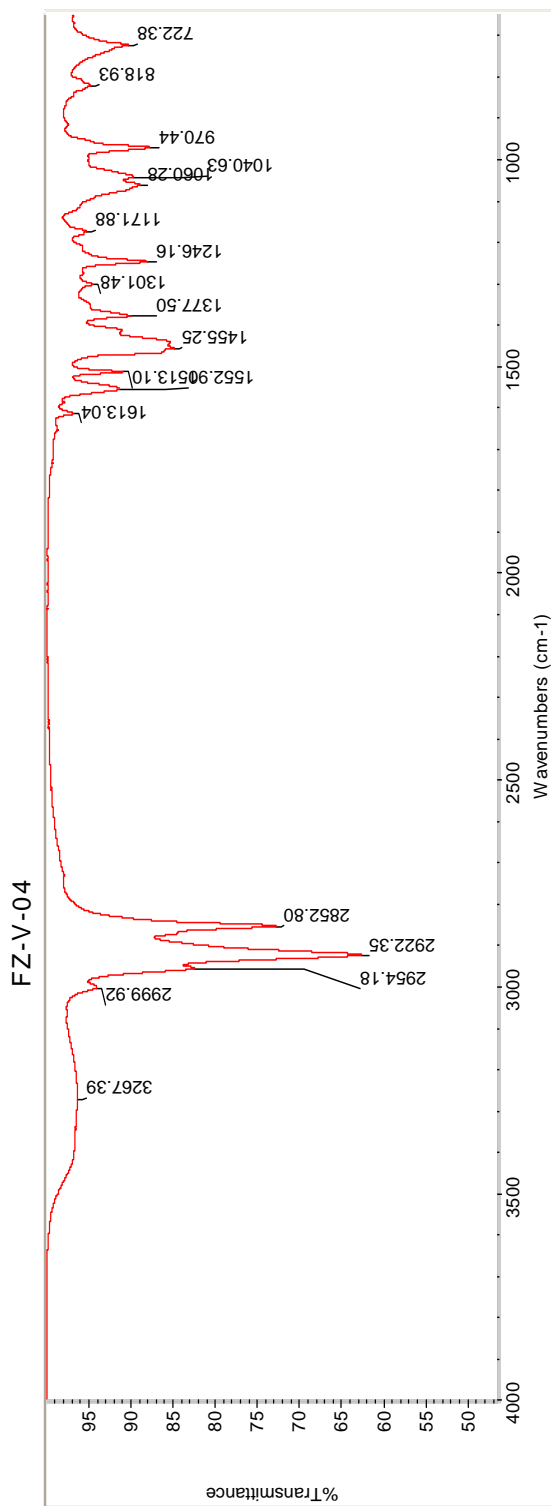

Thu Apr 14 18:06:41 2011 (GMT-04:00)

Number of sample scans: 16  
Number of background scans: 16  
Resolution: 4.000  
Sample gain: 1.0  
Optical velocity: 0.4747  
Aperture: 80.00

**FIND PEAKS:**  
Spectrum: FZ-V-04  
Region: 4000.12 649.89  
Absolute threshold: 98.387  
Sensitivity: 59  
Peak list:

| Position | Intensity |
|----------|-----------|
| 722.38   | Intensiv  |
| 818.93   | Intensiv  |
| 970.44   | Intensiv  |
| 1040.63  | Intensiv  |
| 1060.28  | Intensiv  |
| 1171.88  | Intensiv  |
| 1246.16  | Intensiv  |

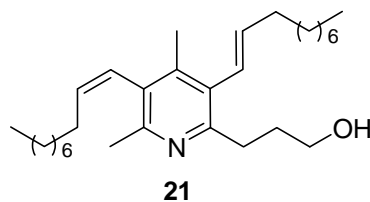

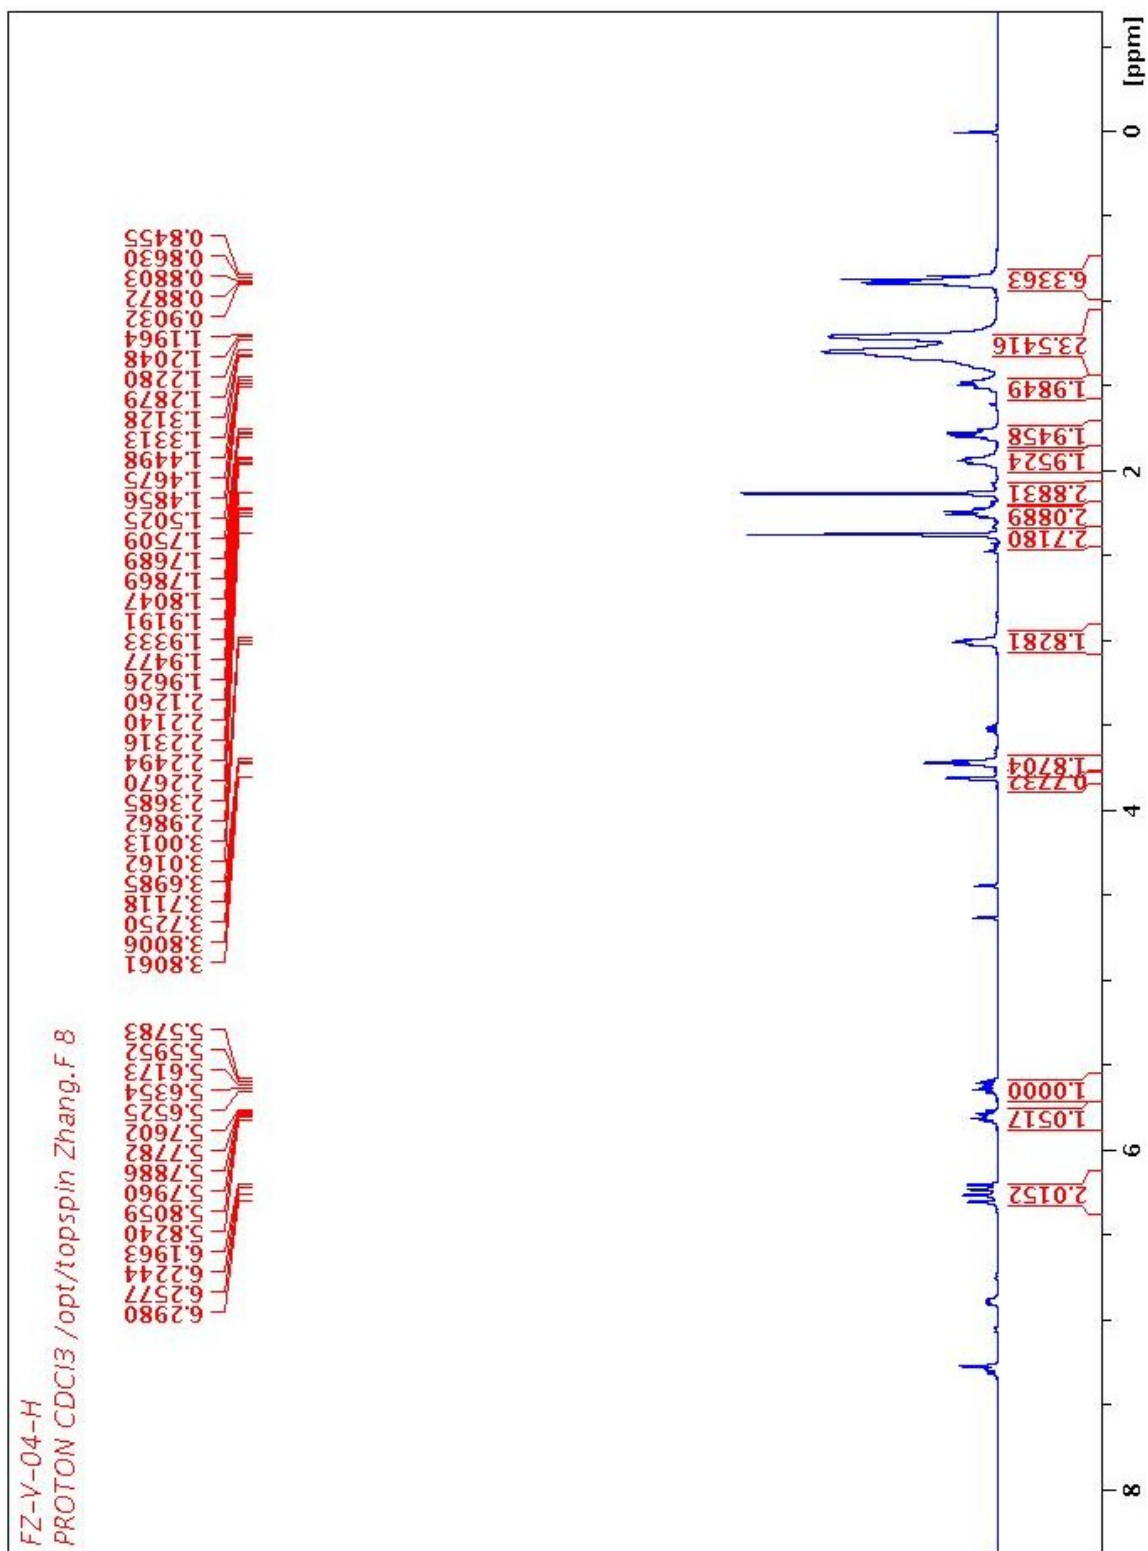

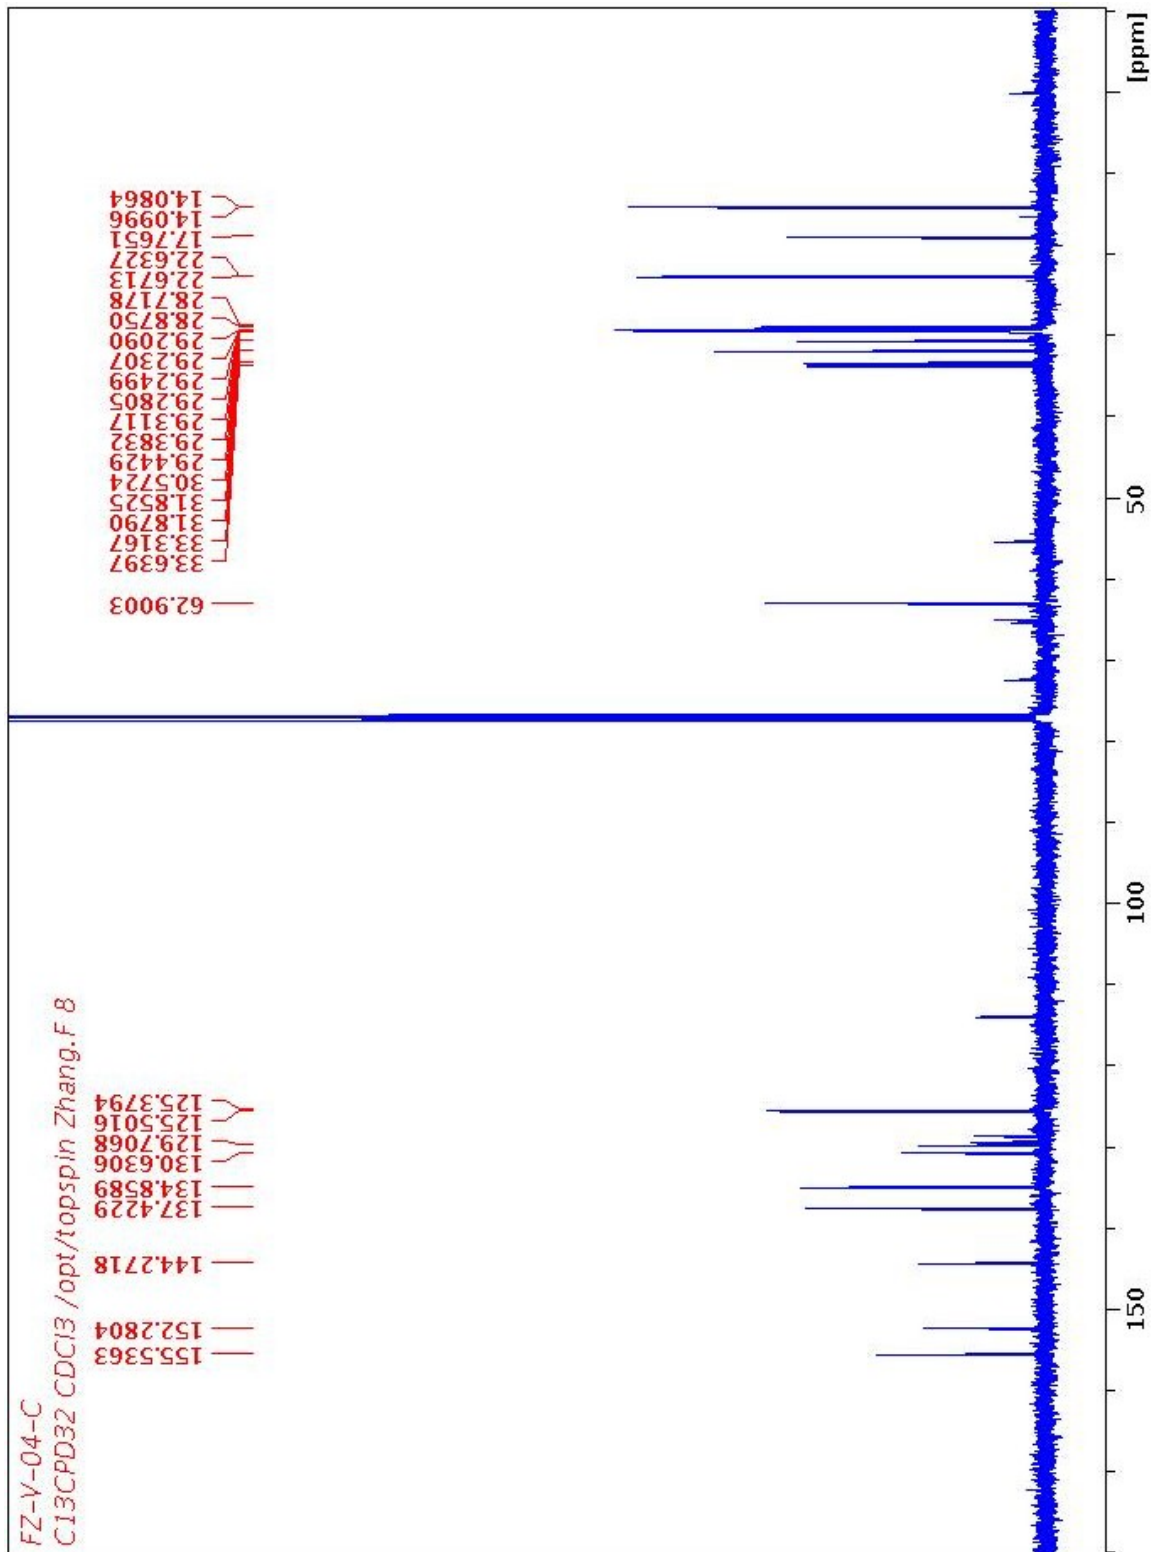

r11080912 #4-48 RT: 0.04-0.65 AV: 45 NL: 2.29E7  
T: FTMS + p NSI Full ms [300.00-1500.00]

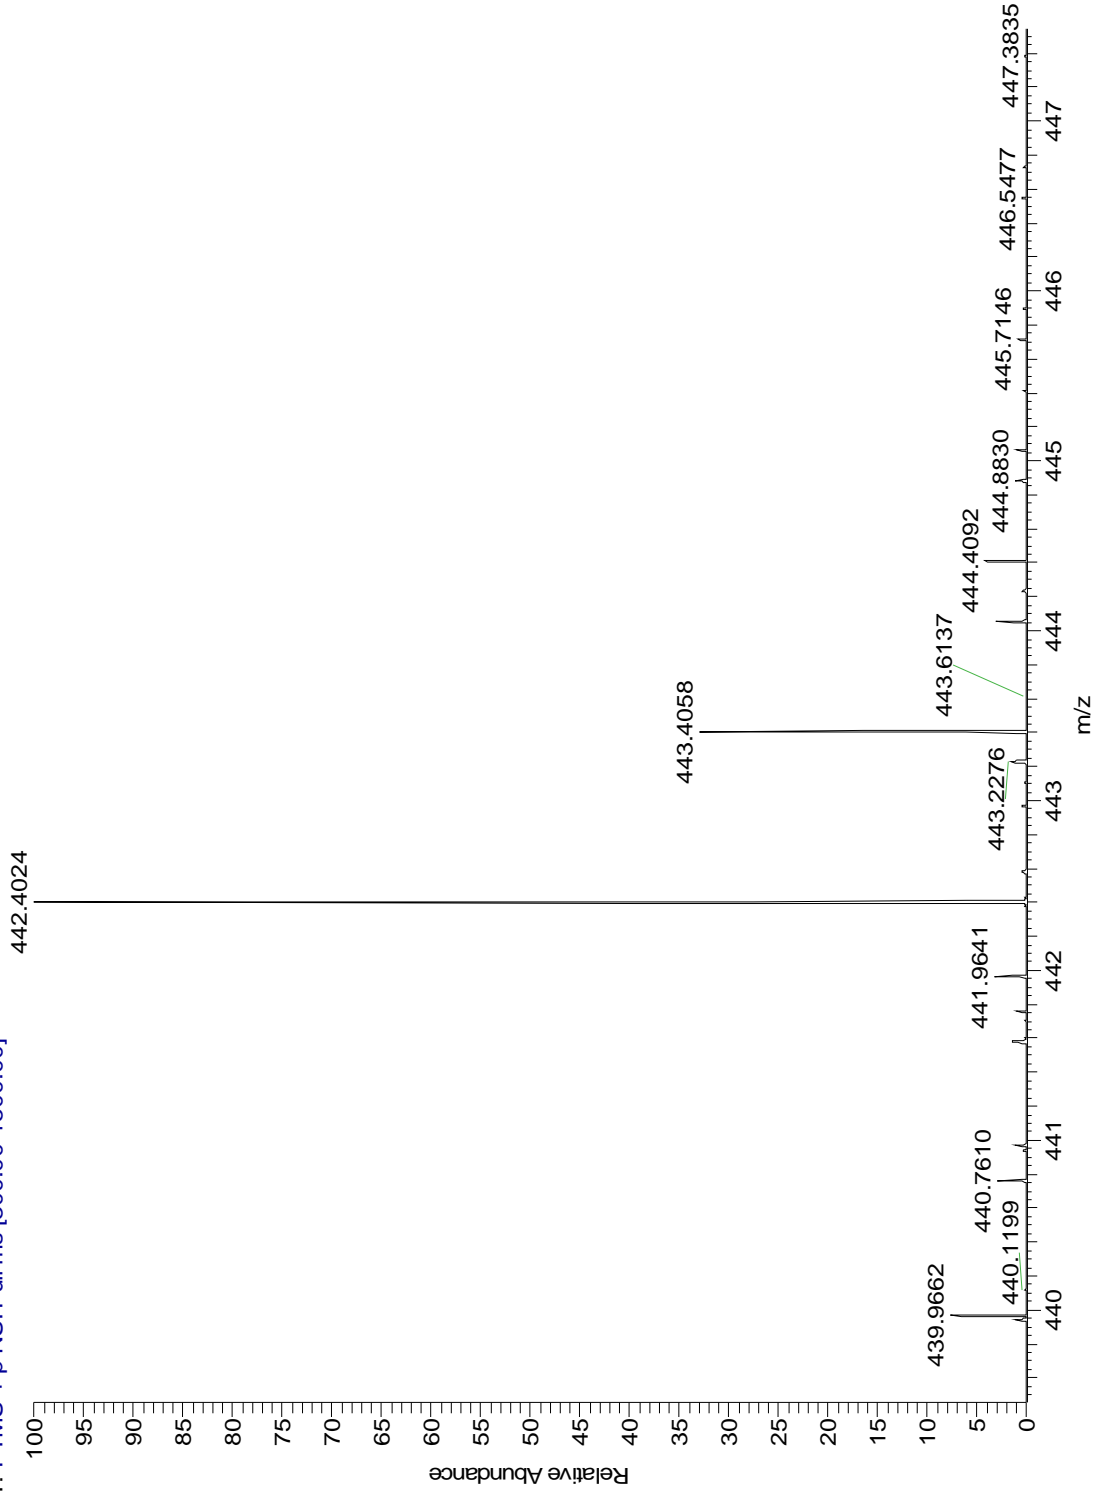



Thu Apr 14 18:07:20 2011 (G

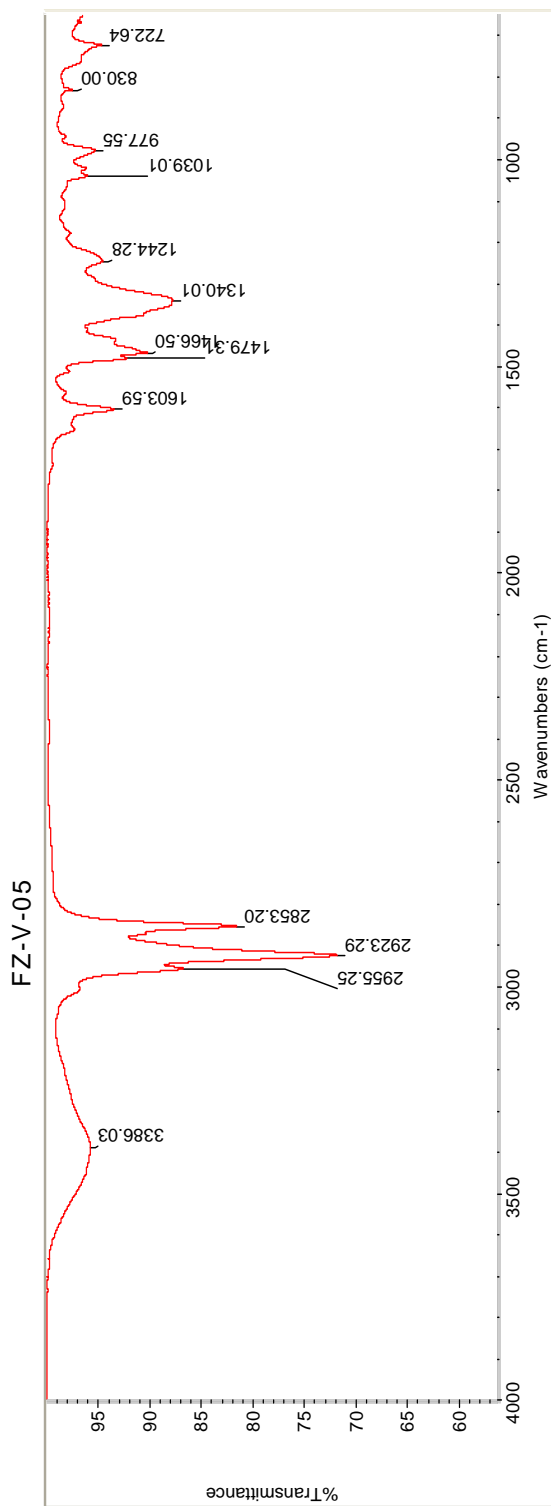

Thu Apr 14 18:07:14 2011 (GMT-04:00)

Number of sample scans: 16  
Number of background scans: 16  
Resolution: 4.000  
Sample gain: 1.0  
Optical velocity: 0.4747  
Aperture: 80.00

**FIND PEAKS:**

| Region              | Position | Intensity |
|---------------------|----------|-----------|
| FZ-V-05             | 722.64   | Intensiv  |
|                     | 830.00   | Intensiv  |
|                     | 977.55   | Intensiv  |
|                     | 1039.01  | Intensiv  |
|                     | 1244.28  | Intensiv  |
|                     | 1340.01  | Intensiv  |
|                     | 1466.50  | Intensiv  |
|                     | 1603.59  | Intensiv  |
|                     | 2853.20  | Intensiv  |
|                     | 2923.29  | Intensiv  |
|                     | 2955.25  | Intensiv  |
|                     | 3386.03  | Intensiv  |
| Absolute threshold: | 59       |           |
| Sensitivity:        | 59       |           |
| Peak list:          |          |           |

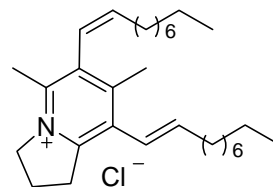

**3 (11Z,22E)**

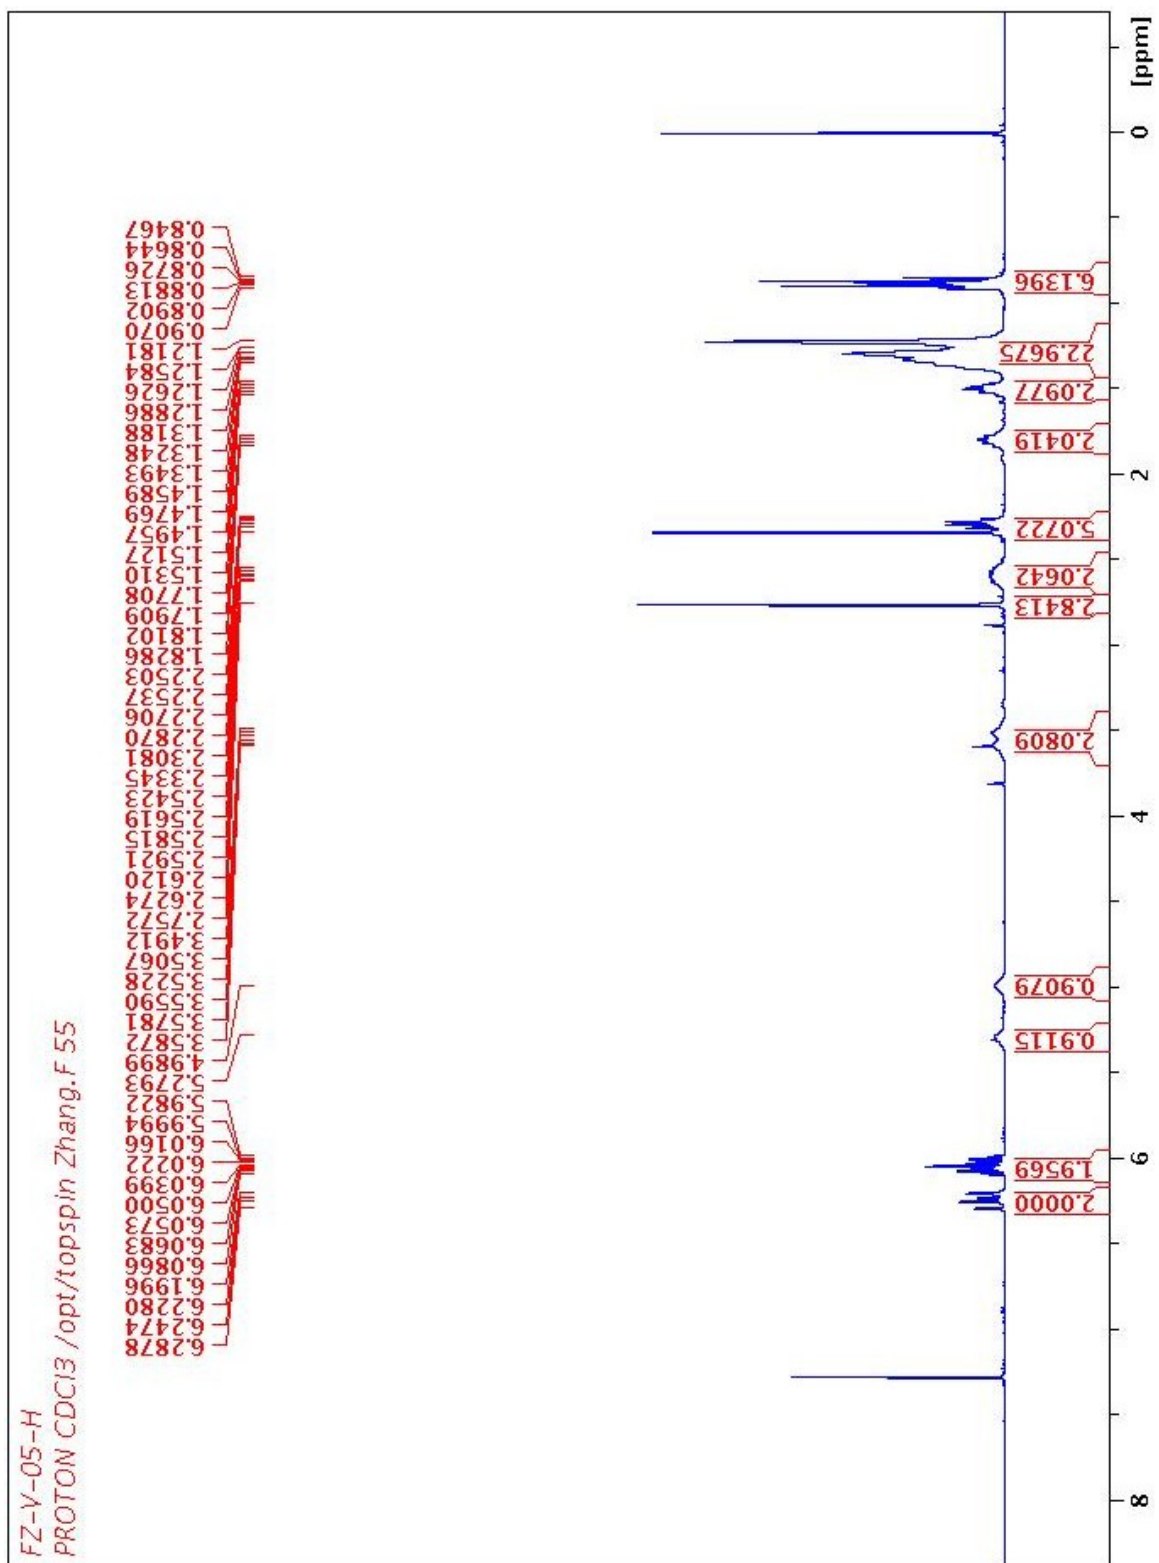

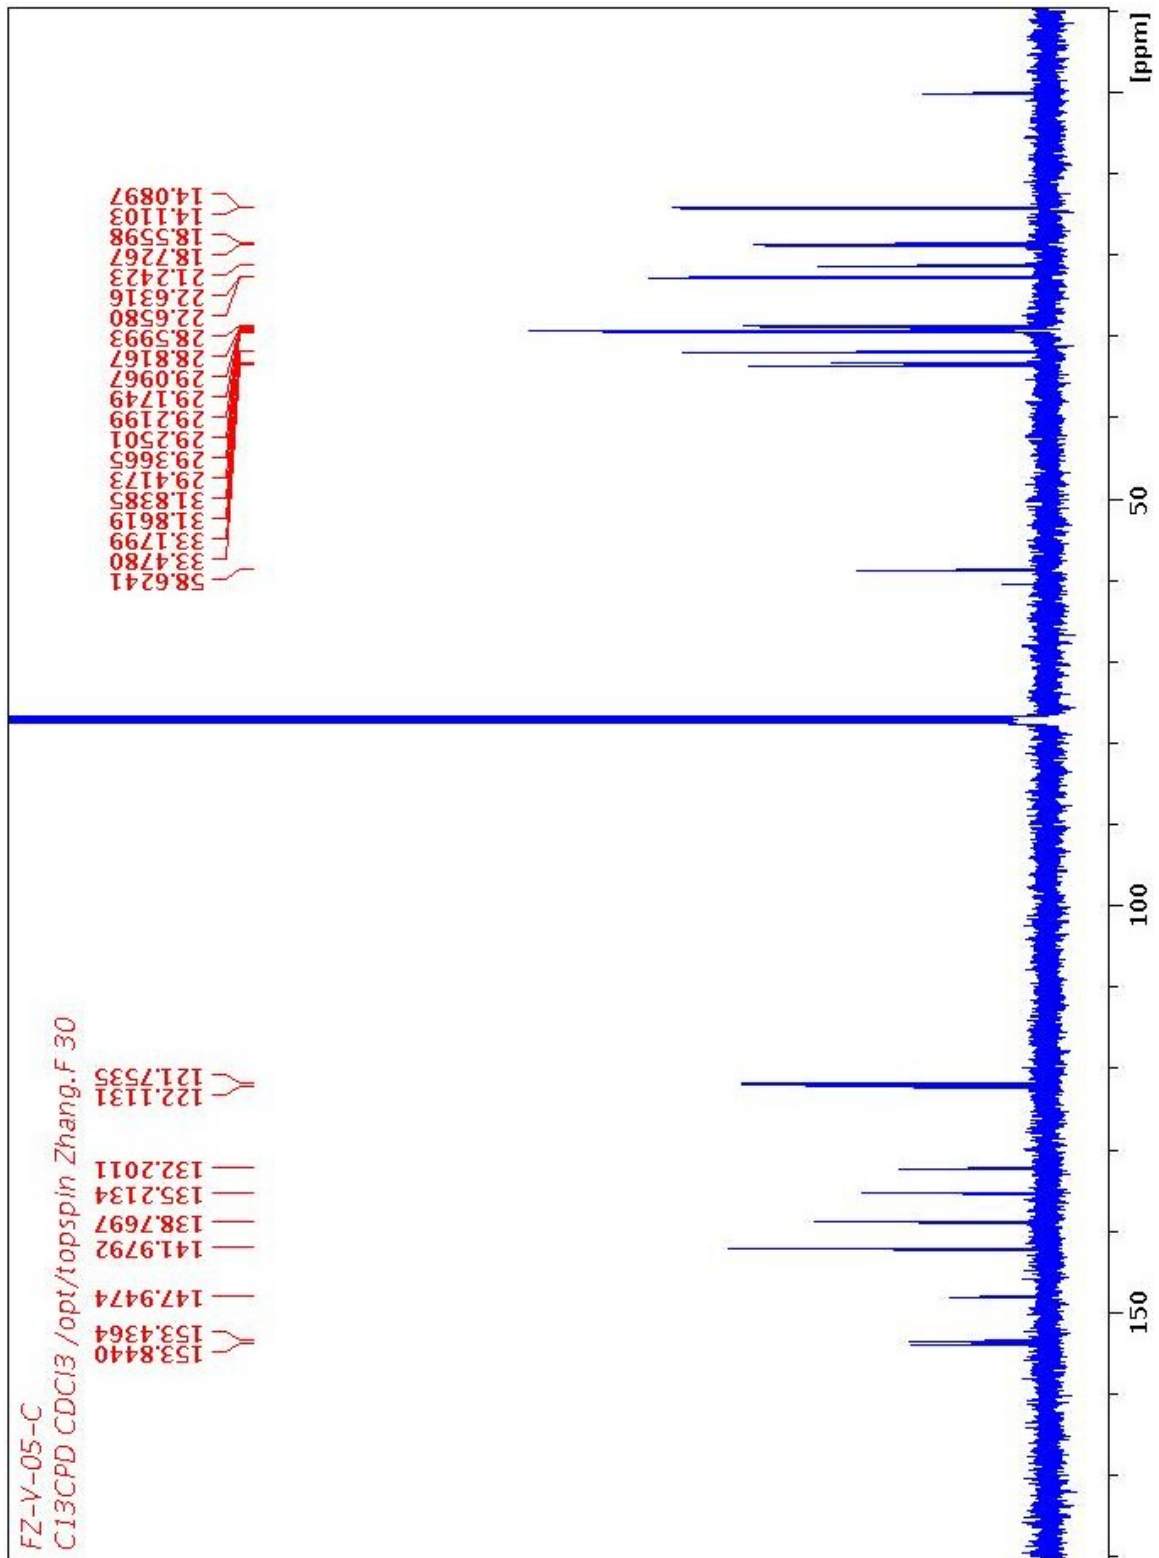

r110622r02 #3-34 RT: 0.03-0.46 AV: 32 NL: 1.03E8  
T: FTMS + p NSI Full ms [300.00-2000.00]

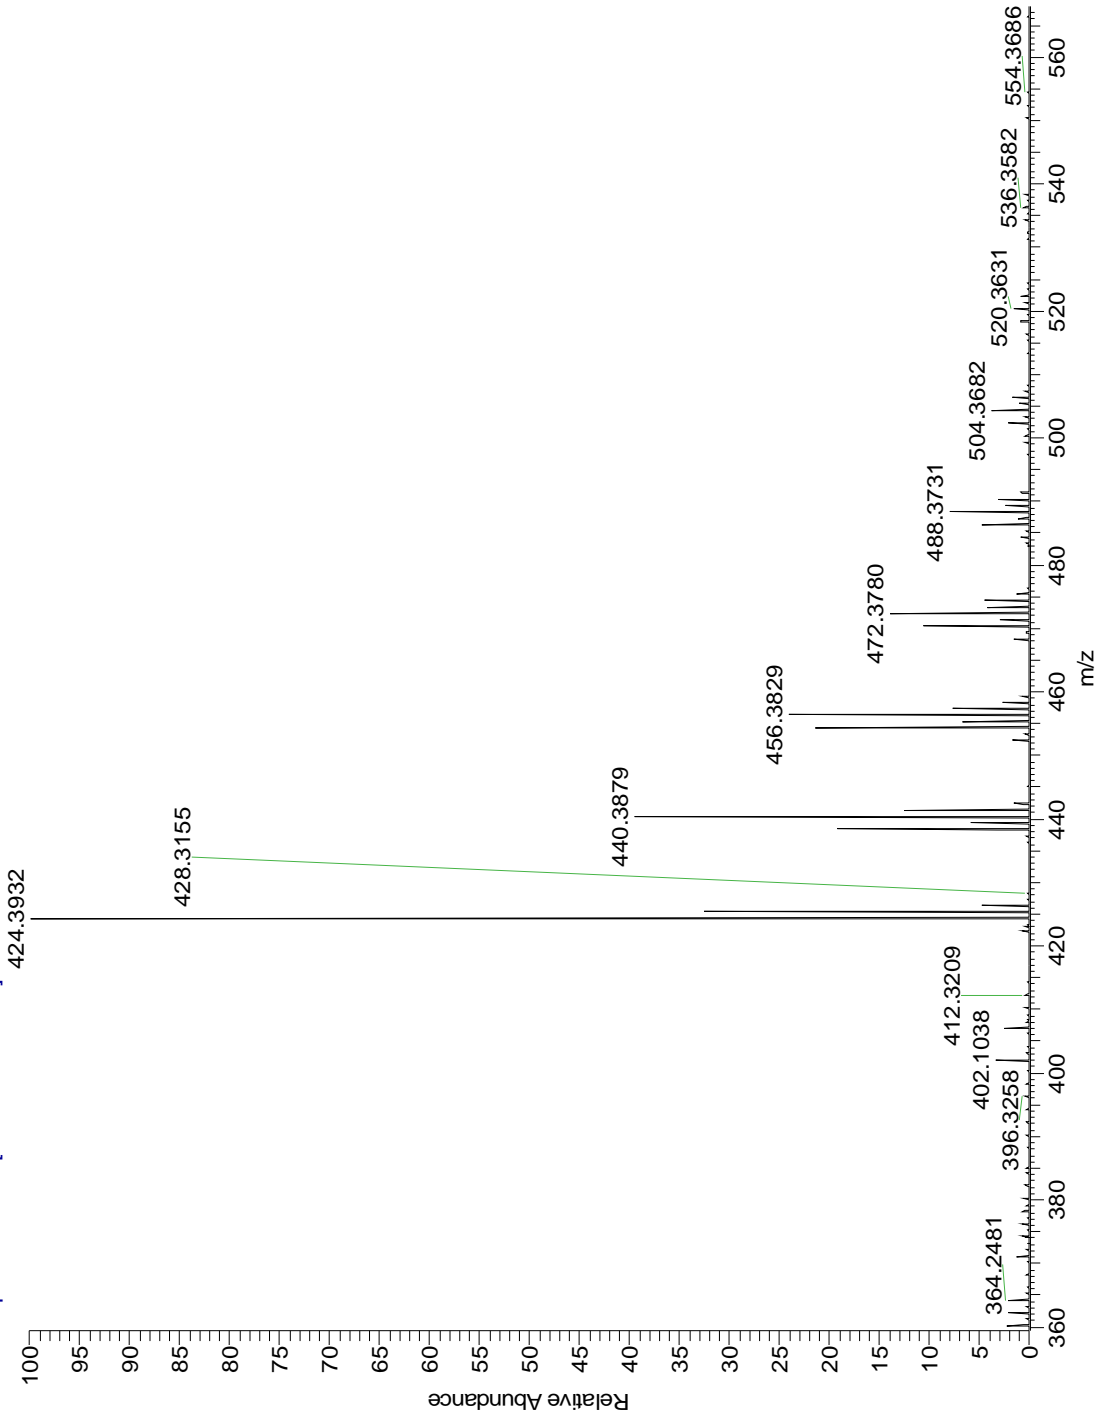

Thu Apr 14 18:03:21 2011 (G

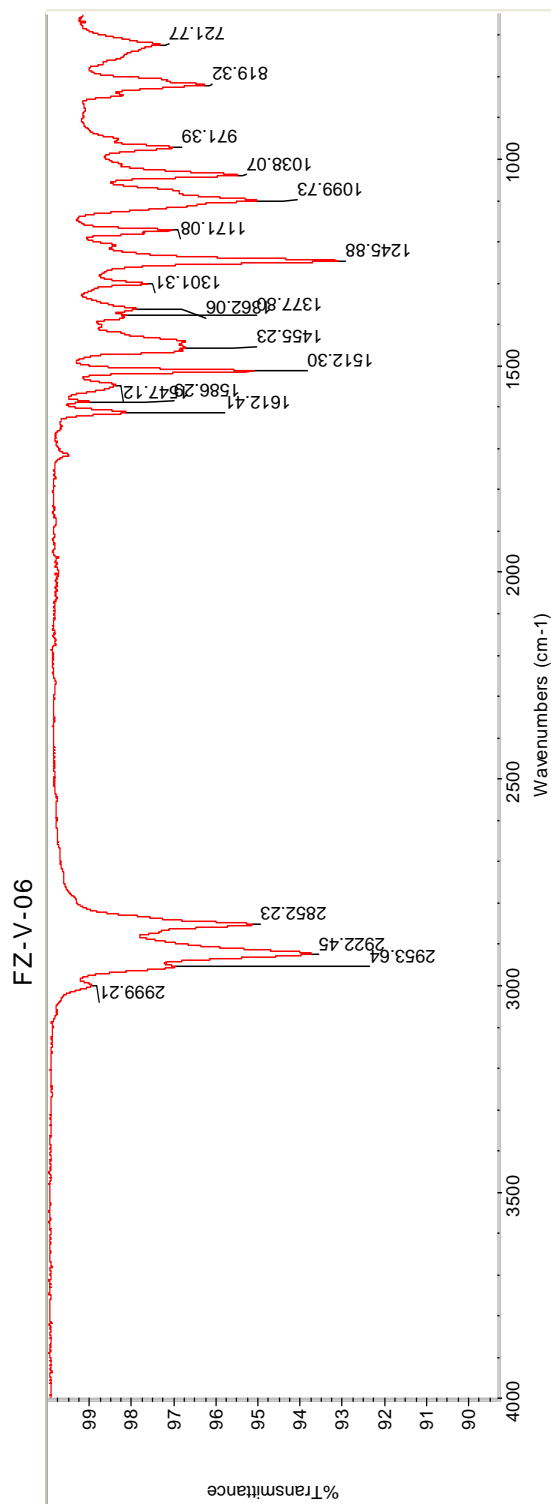

Thu Apr 14 18:03:16 2011 (GMT-04:00)

Number of sample scans: 16  
Number of background scans: 16  
Resolution: 4.000  
Sample gain: 1.0  
Optical velocity: 0.4747  
Aperture: 80.00

FIND PEAKS:

| Region  | Spectrum | Position | Intensity |
|---------|----------|----------|-----------|
| 4000.12 | FZ-V-06  | 2999.21  | 99.218    |
| 649.89  |          | 721.77   | Intensiv  |
| 99.218  |          | 819.32   | Intensiv  |
|         |          | 971.39   | Intensiv  |
|         |          | 1038.07  | Intensiv  |
|         |          | 1099.73  | Intensiv  |
|         |          | 1171.08  | Intensiv  |
|         |          | 1245.88  | Intensiv  |

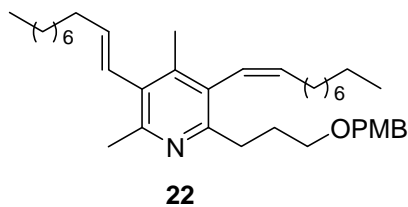

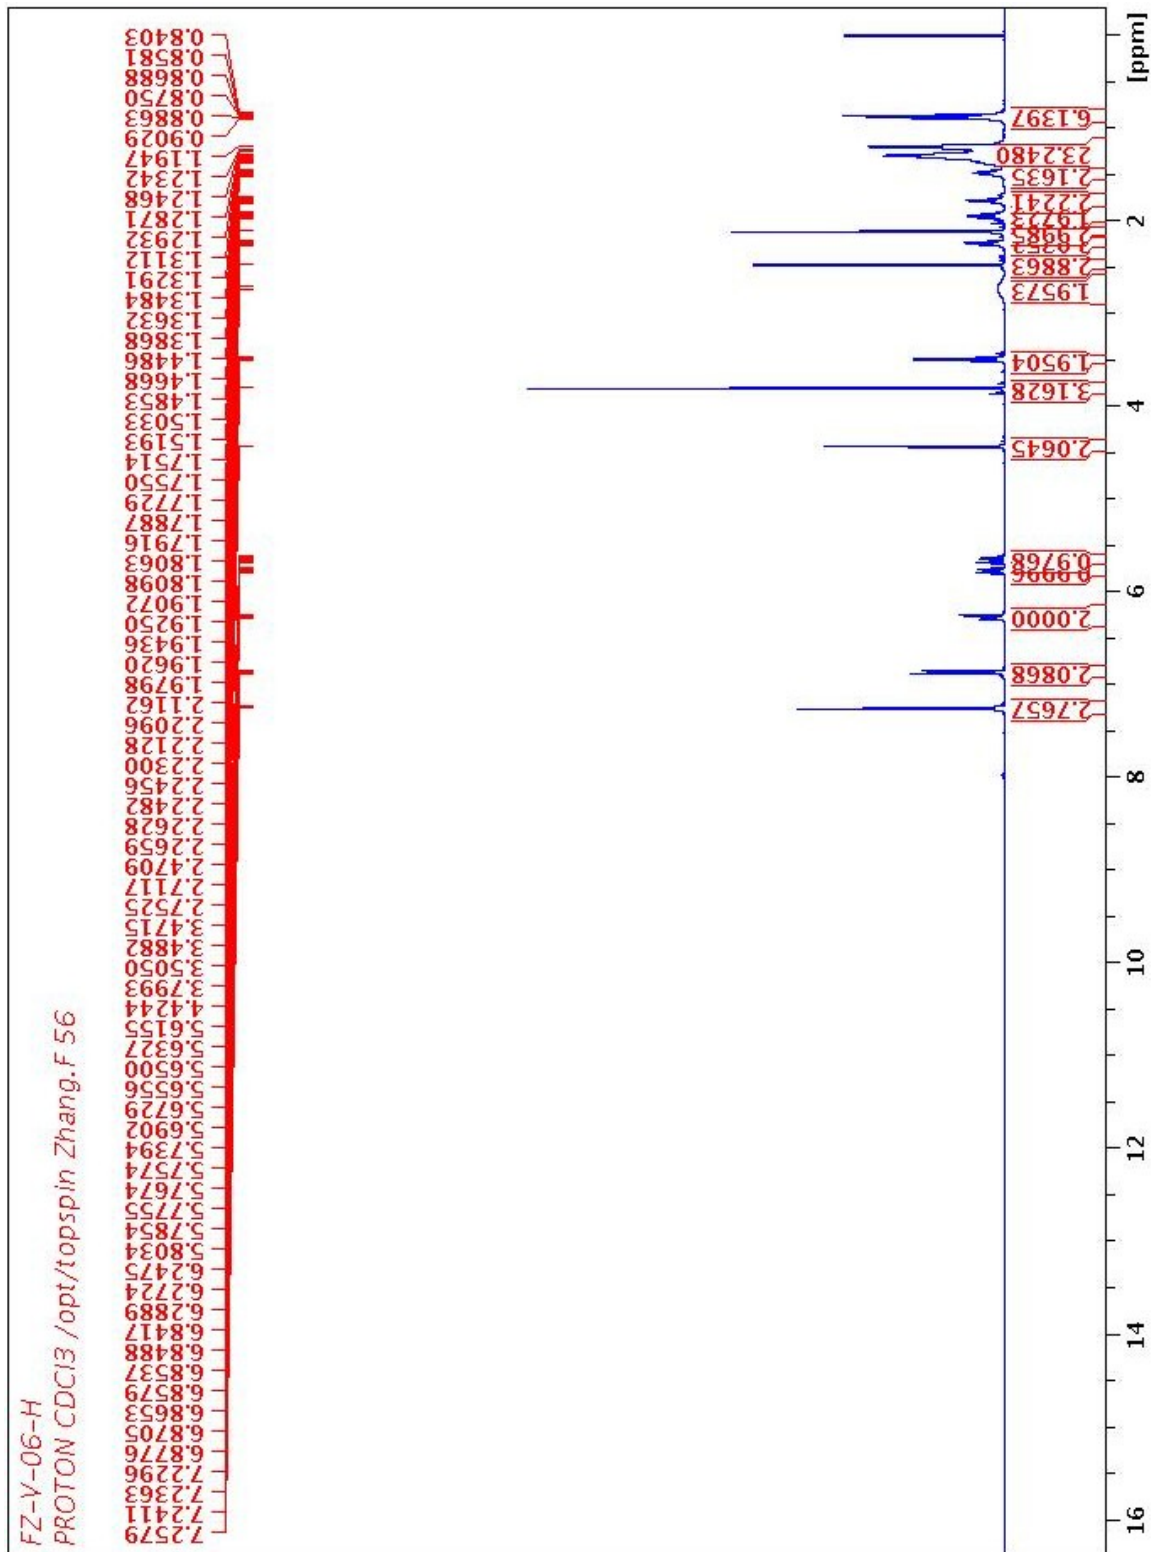

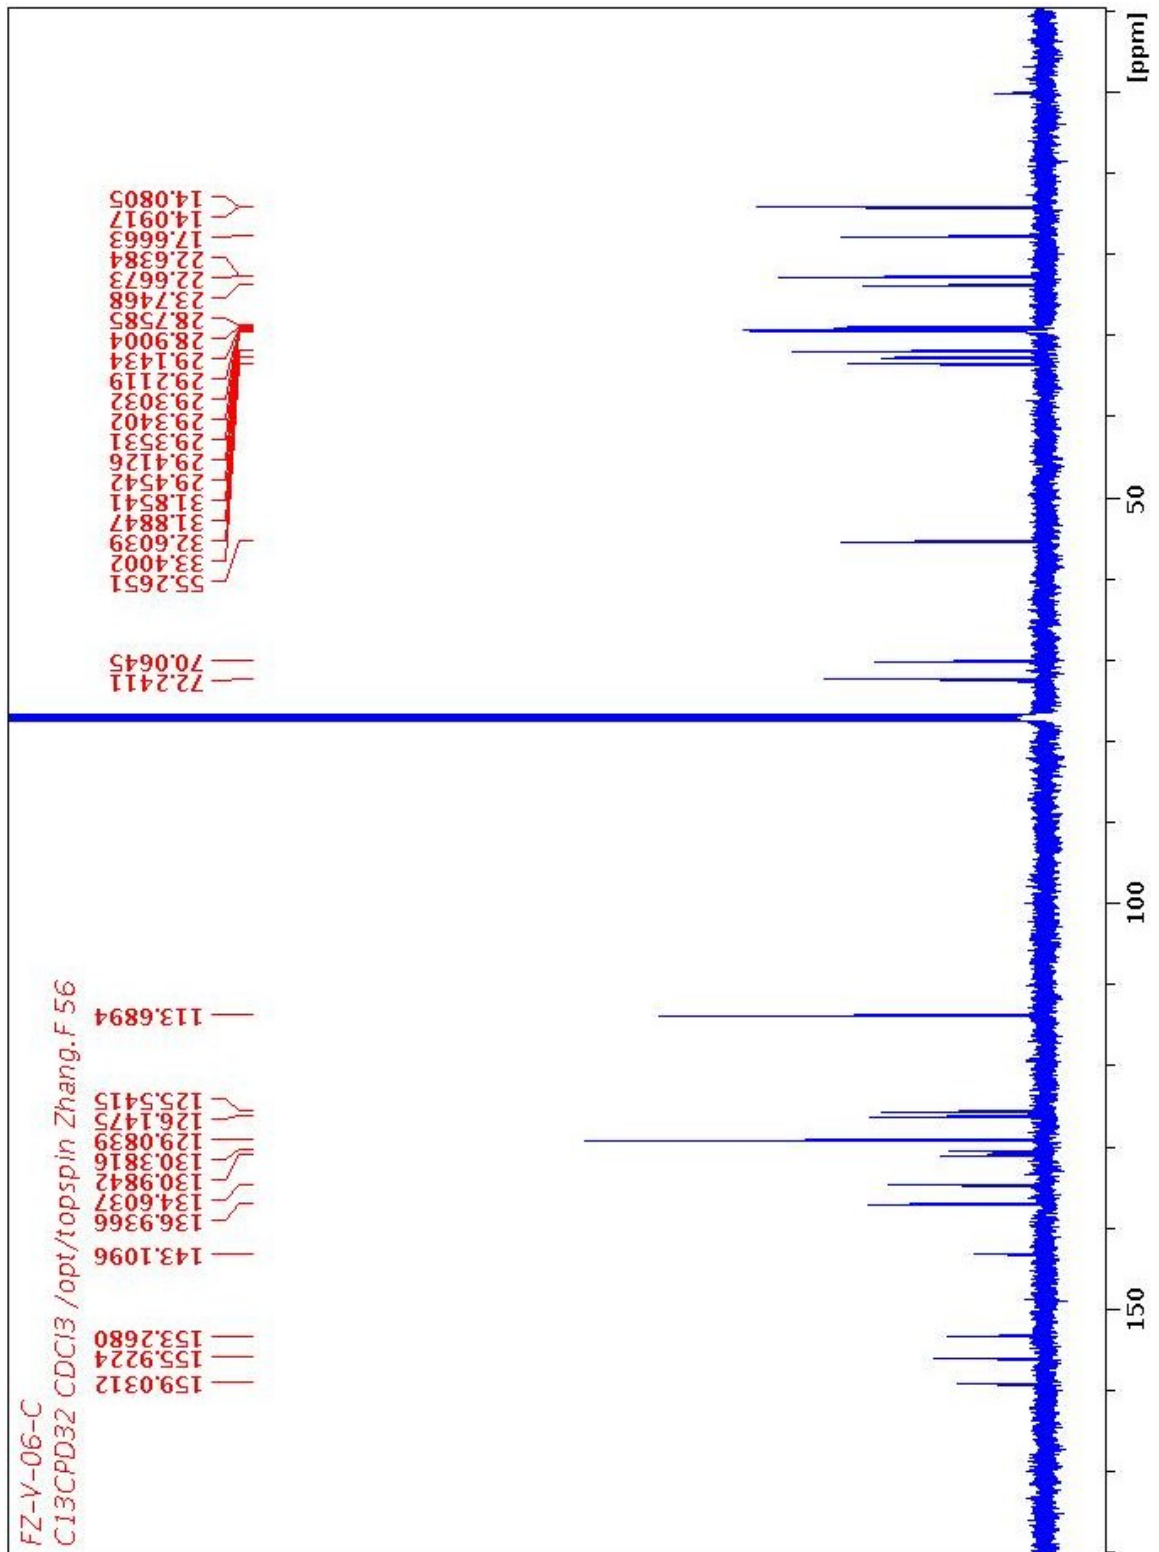

r11080913 #2-49 RT: 0.02-0.67 AV: 48 NL: 5.74E7  
T: FTMS + p NSIFull ms [300.00-1500.00]

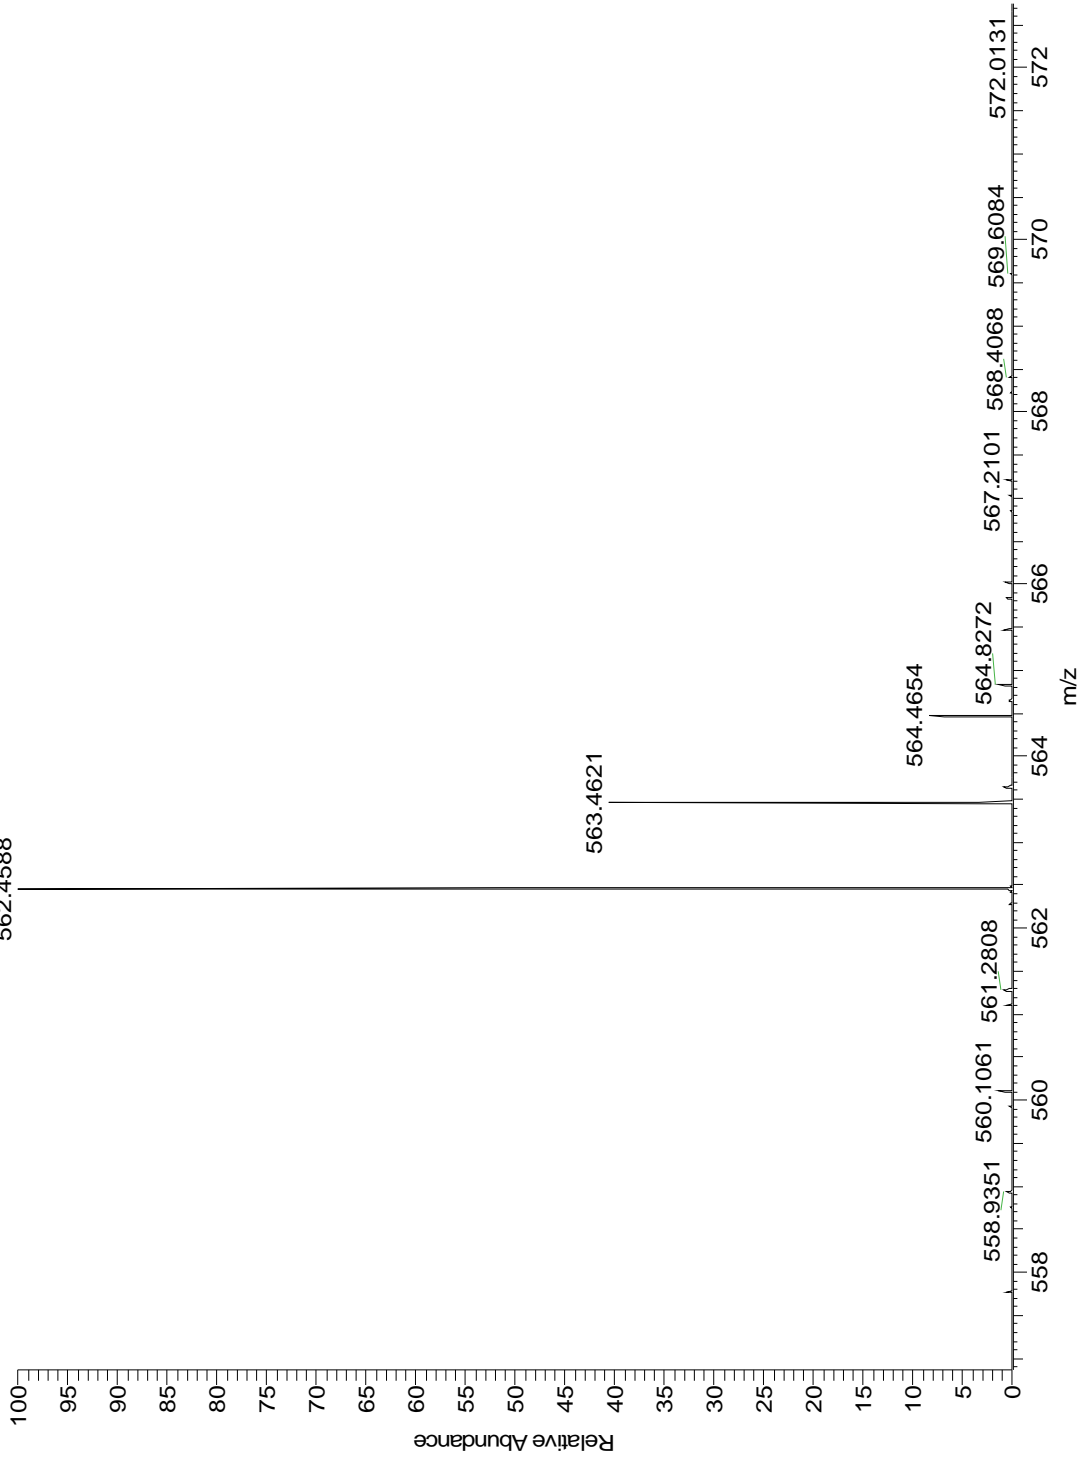



Thu Apr 14 18:03:59 2011 (G

FZ-V-07

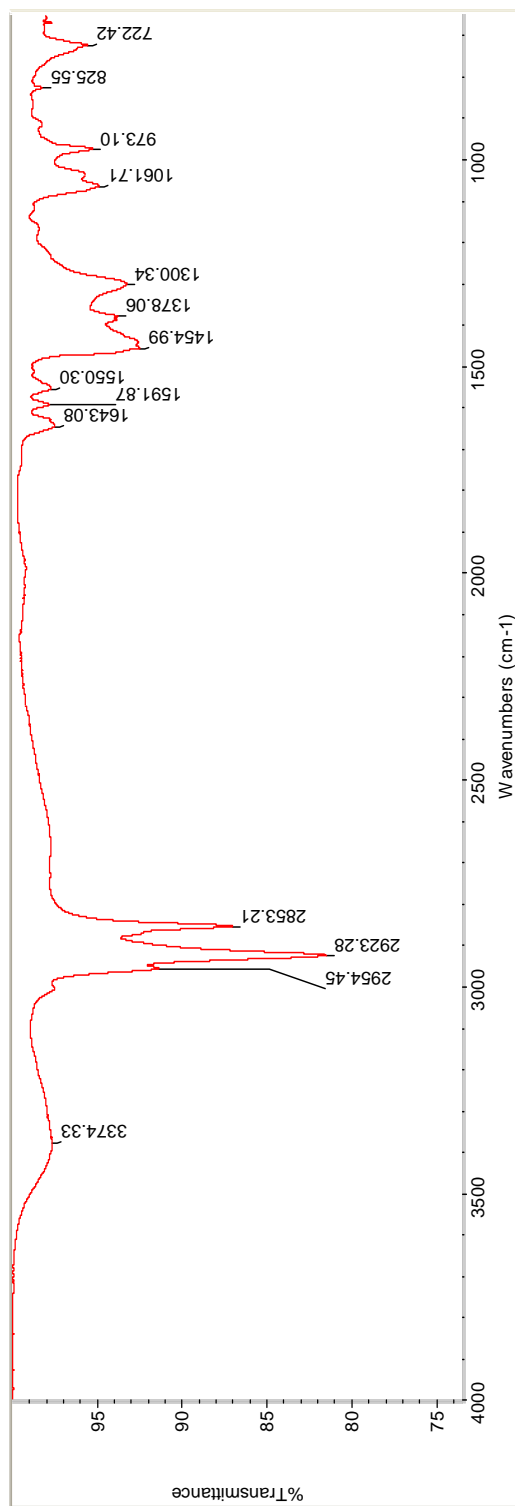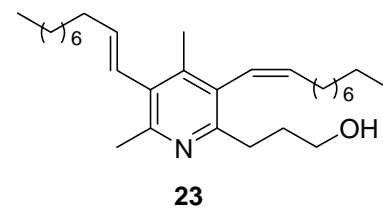

Thu Apr 14 18:03:55 2011 (GMT-04:00)

Number of sample scans: 16  
Number of background scans: 16  
Resolution: 4.000  
Sample gain: 1.0  
Optical velocity: 0.4747  
Aperture: 80.00

FIND PEAKS:

|                     |          |
|---------------------|----------|
| Spectrum:           | FZ-V-07  |
| Region:             | 4000.12  |
| Absolute threshold: | 649.89   |
| Sensitivity:        | 98.773   |
| Peak list:          | 55       |
| Position:           | 722.42   |
| Intensity:          | Intensiv |
| Position:           | 825.55   |
| Intensity:          | Intensiv |
| Position:           | 973.10   |
| Intensity:          | Intensiv |
| Position:           | 1061.71  |
| Intensity:          | Intensiv |
| Position:           | 1300.34  |
| Intensity:          | Intensiv |
| Position:           | 1378.06  |
| Intensity:          | Intensiv |
| Position:           | 1454.99  |
| Intensity:          | Intensiv |

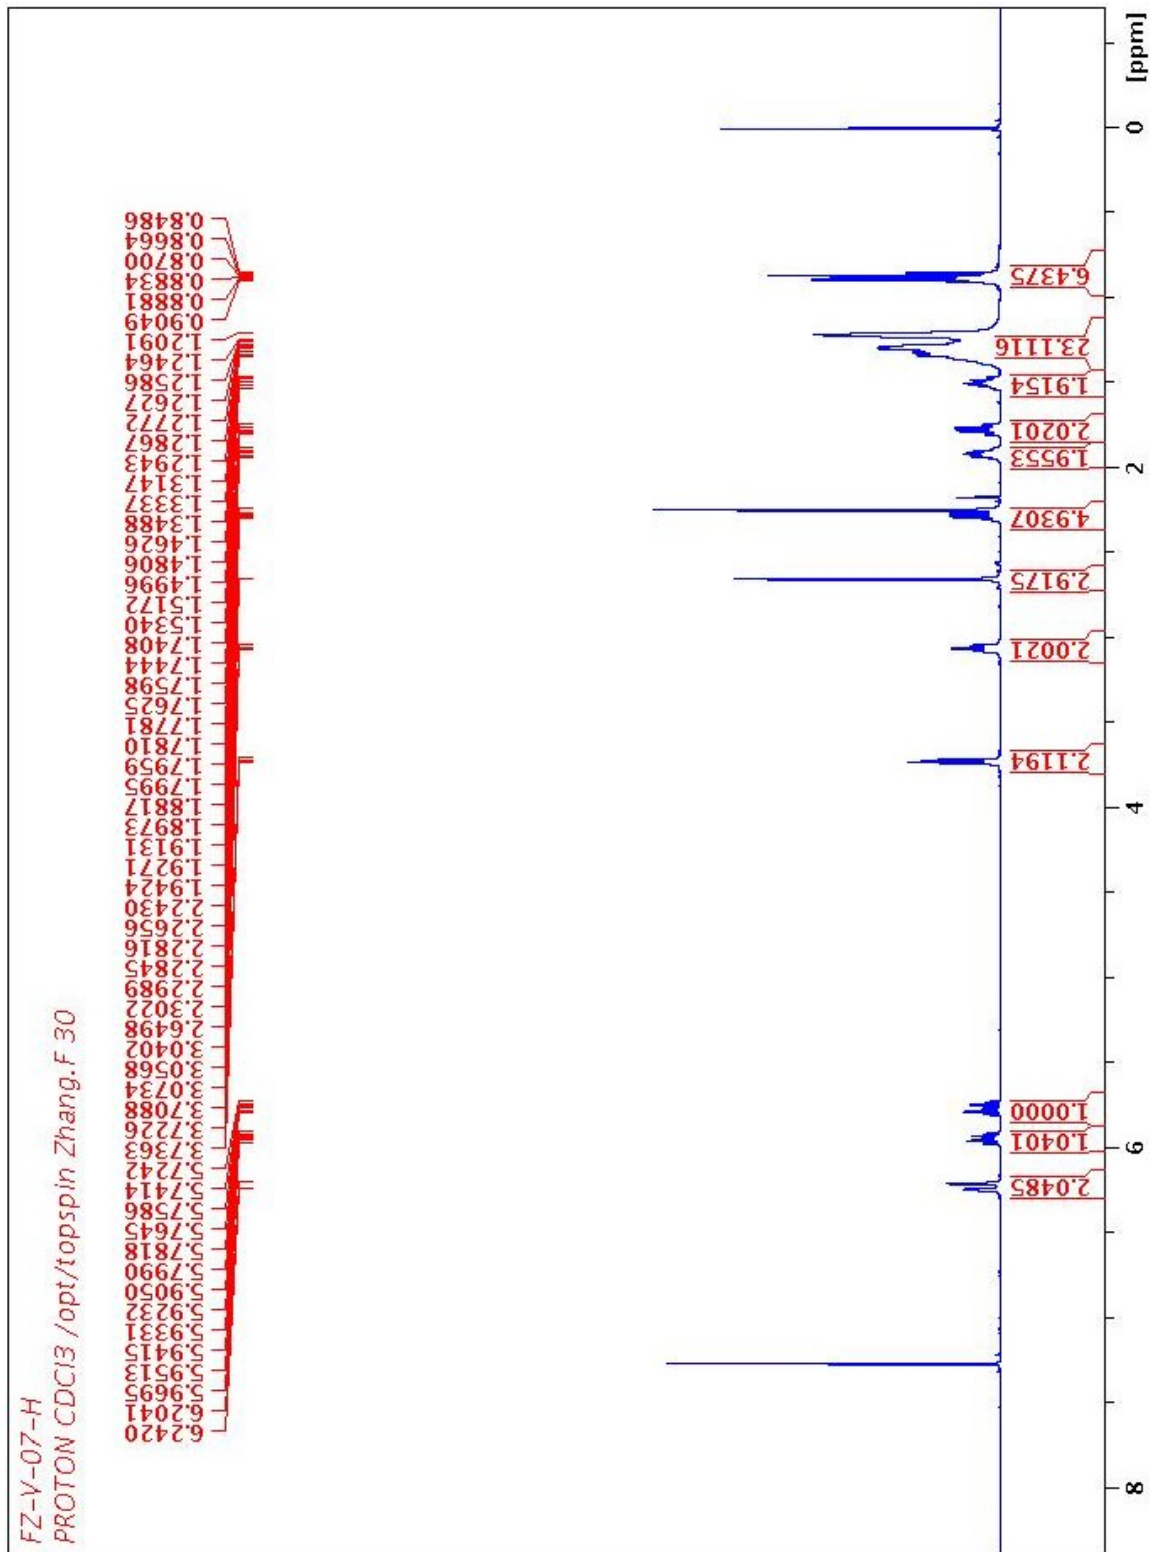

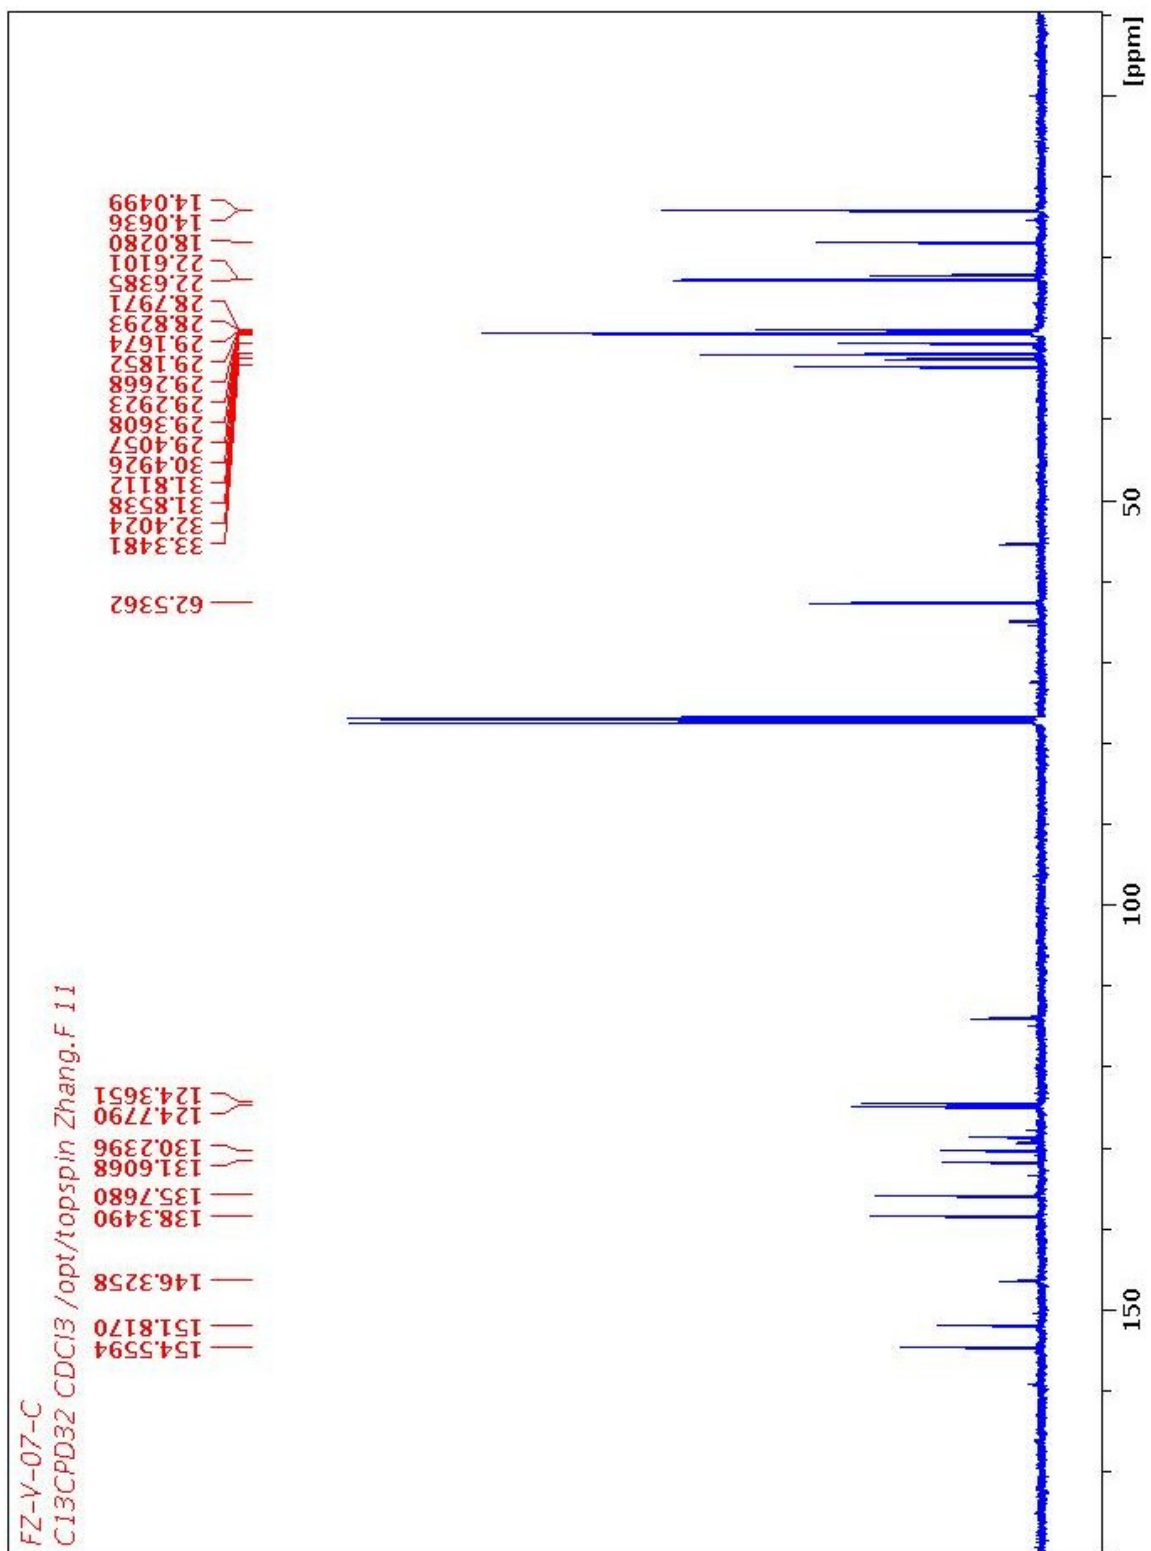

r110809r14 #6-49 RT: 0.07-0.67 AV: 44 NL: 1.22E9  
T: FTMS + p NSIFull ms [300.00-1500.00]

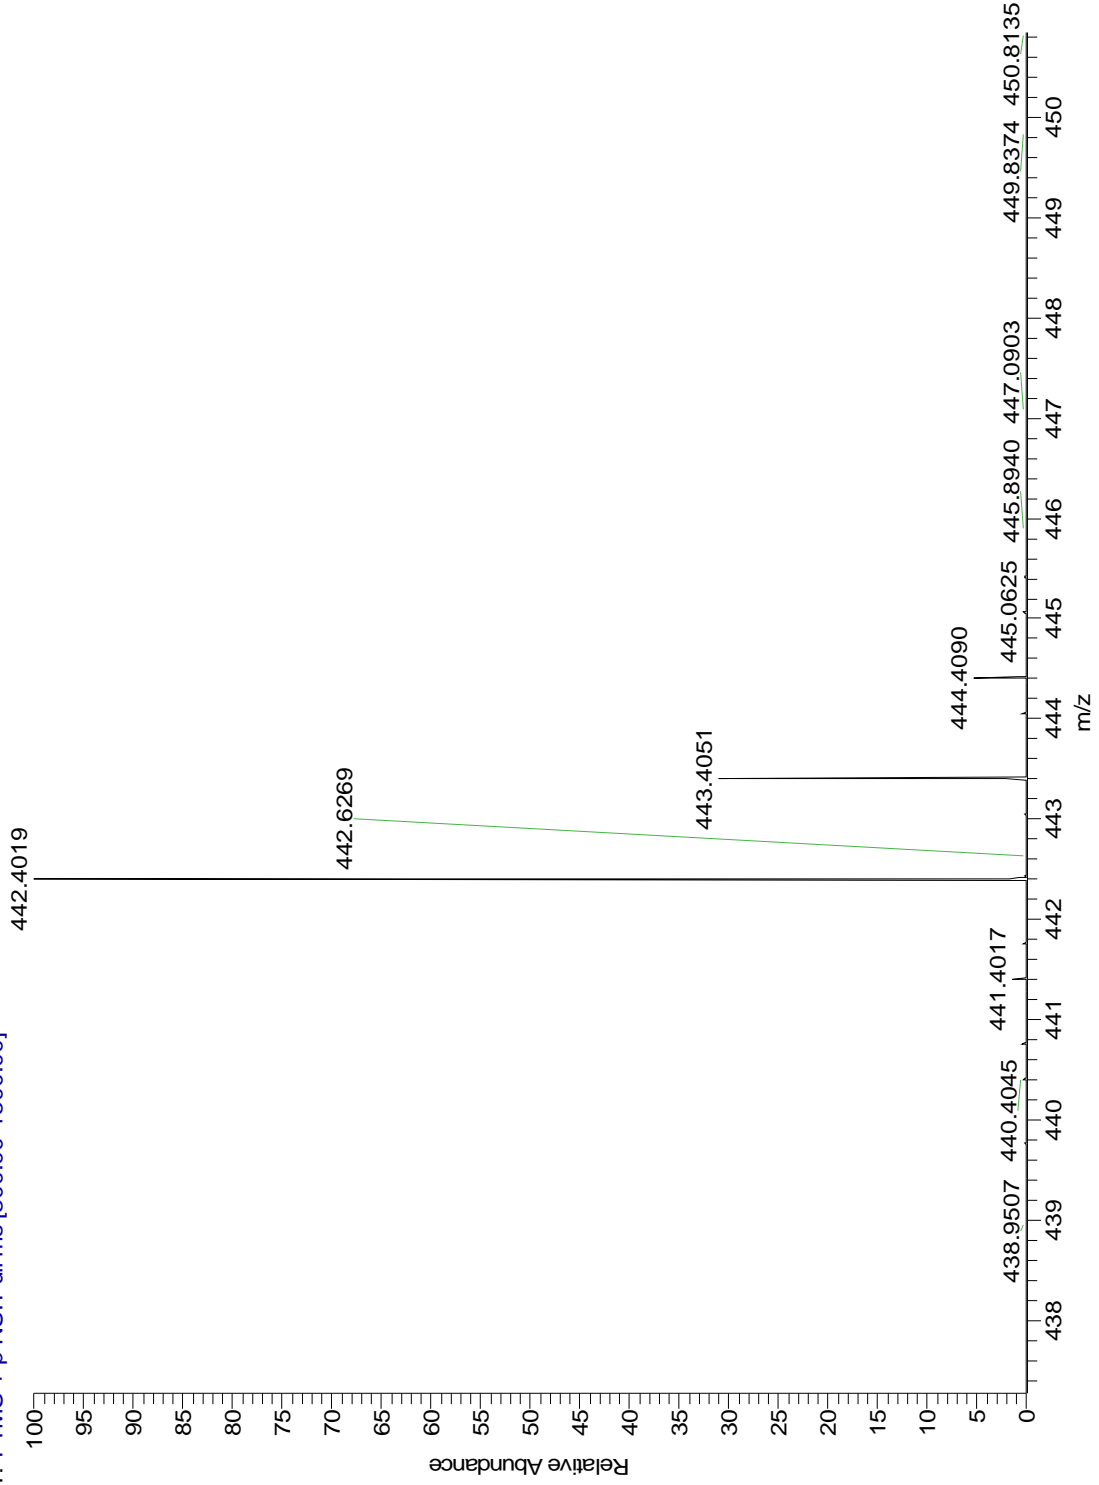

Thu Apr 14 18:04:43 2011 (G

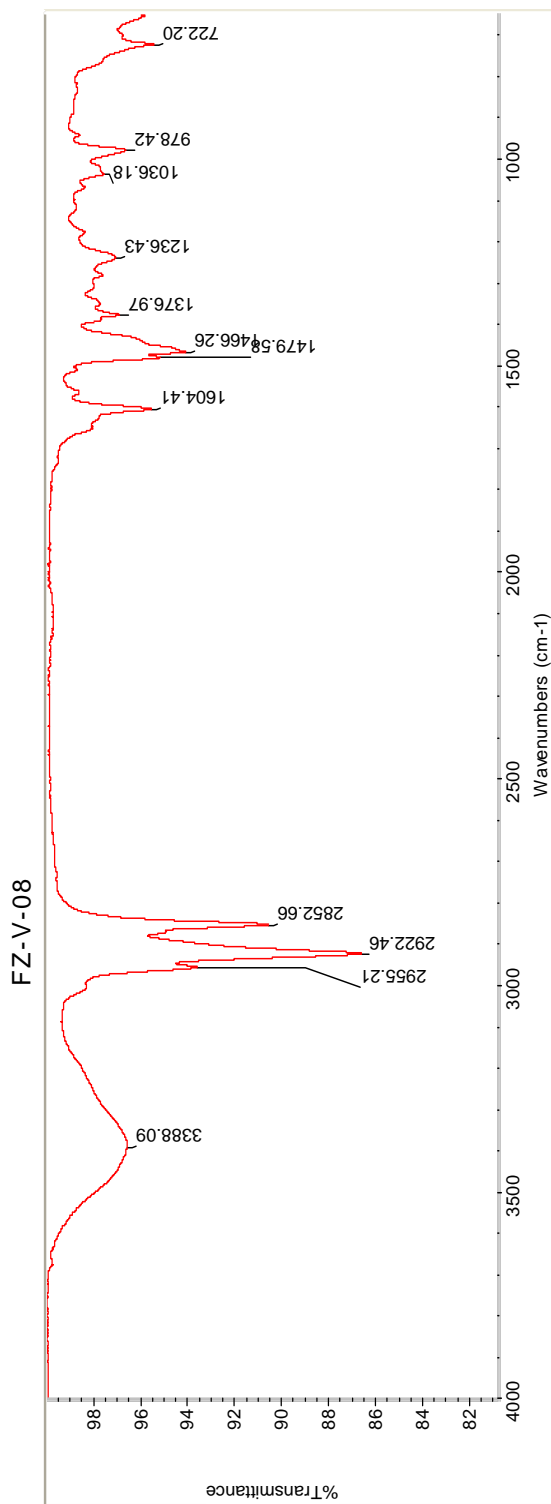

Thu Apr 14 18:04:38 2011 (GMT-04:00)

Number of sample scans: 16  
Number of background scans: 16  
Resolution: 4.000  
Sample gain: 1.0  
Optical velocity: 0.4747  
Aperture: 80.00

Find Peaks:

| Region  | Position | Intensity |
|---------|----------|-----------|
| FZ-V-08 | 722.20   | Intensiv  |
|         | 978.42   | Intensiv  |
|         | 1036.18  | Intensiv  |
|         | 1236.43  | Intensiv  |
|         | 1376.97  | Intensiv  |
|         | 1466.26  | Intensiv  |
|         | 1479.58  | Intensiv  |
|         | 2922.46  |           |
|         | 2852.66  |           |
|         | 2955.21  |           |

Absolute threshold: 99.012  
Sensitivity: 55  
Peak list:

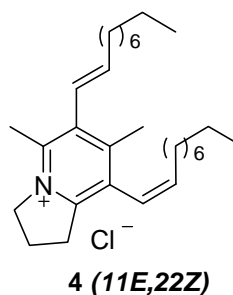

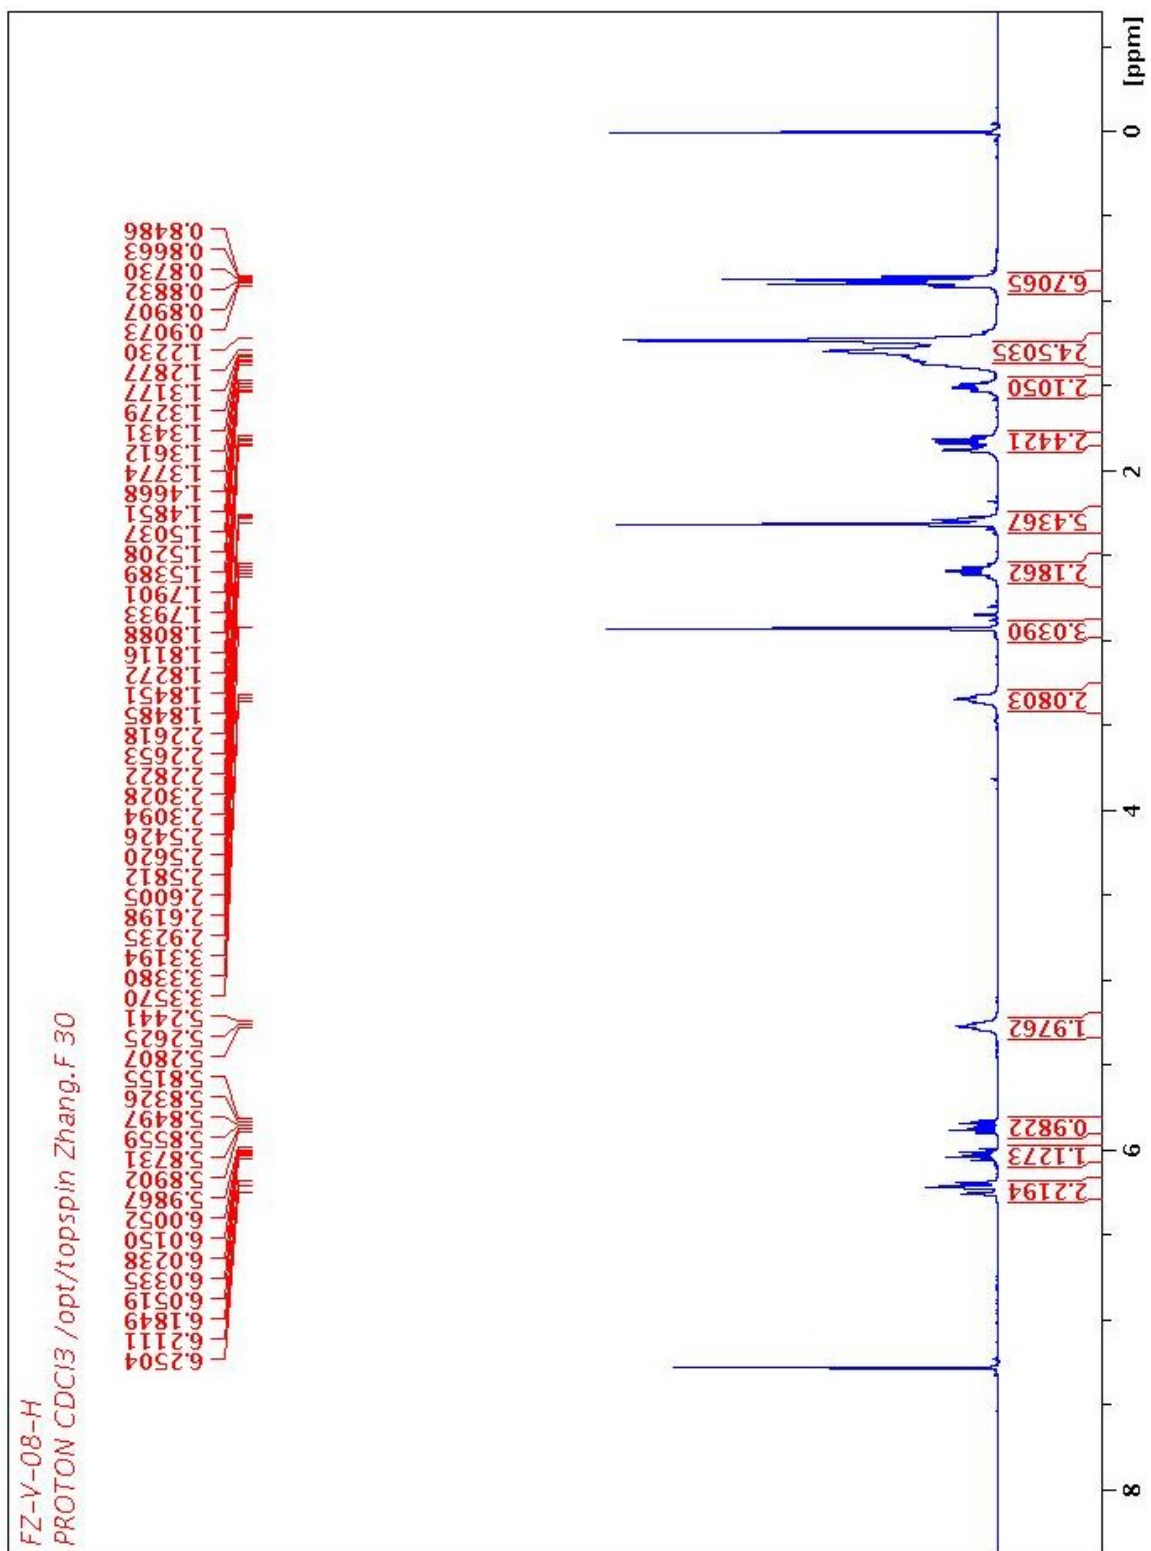

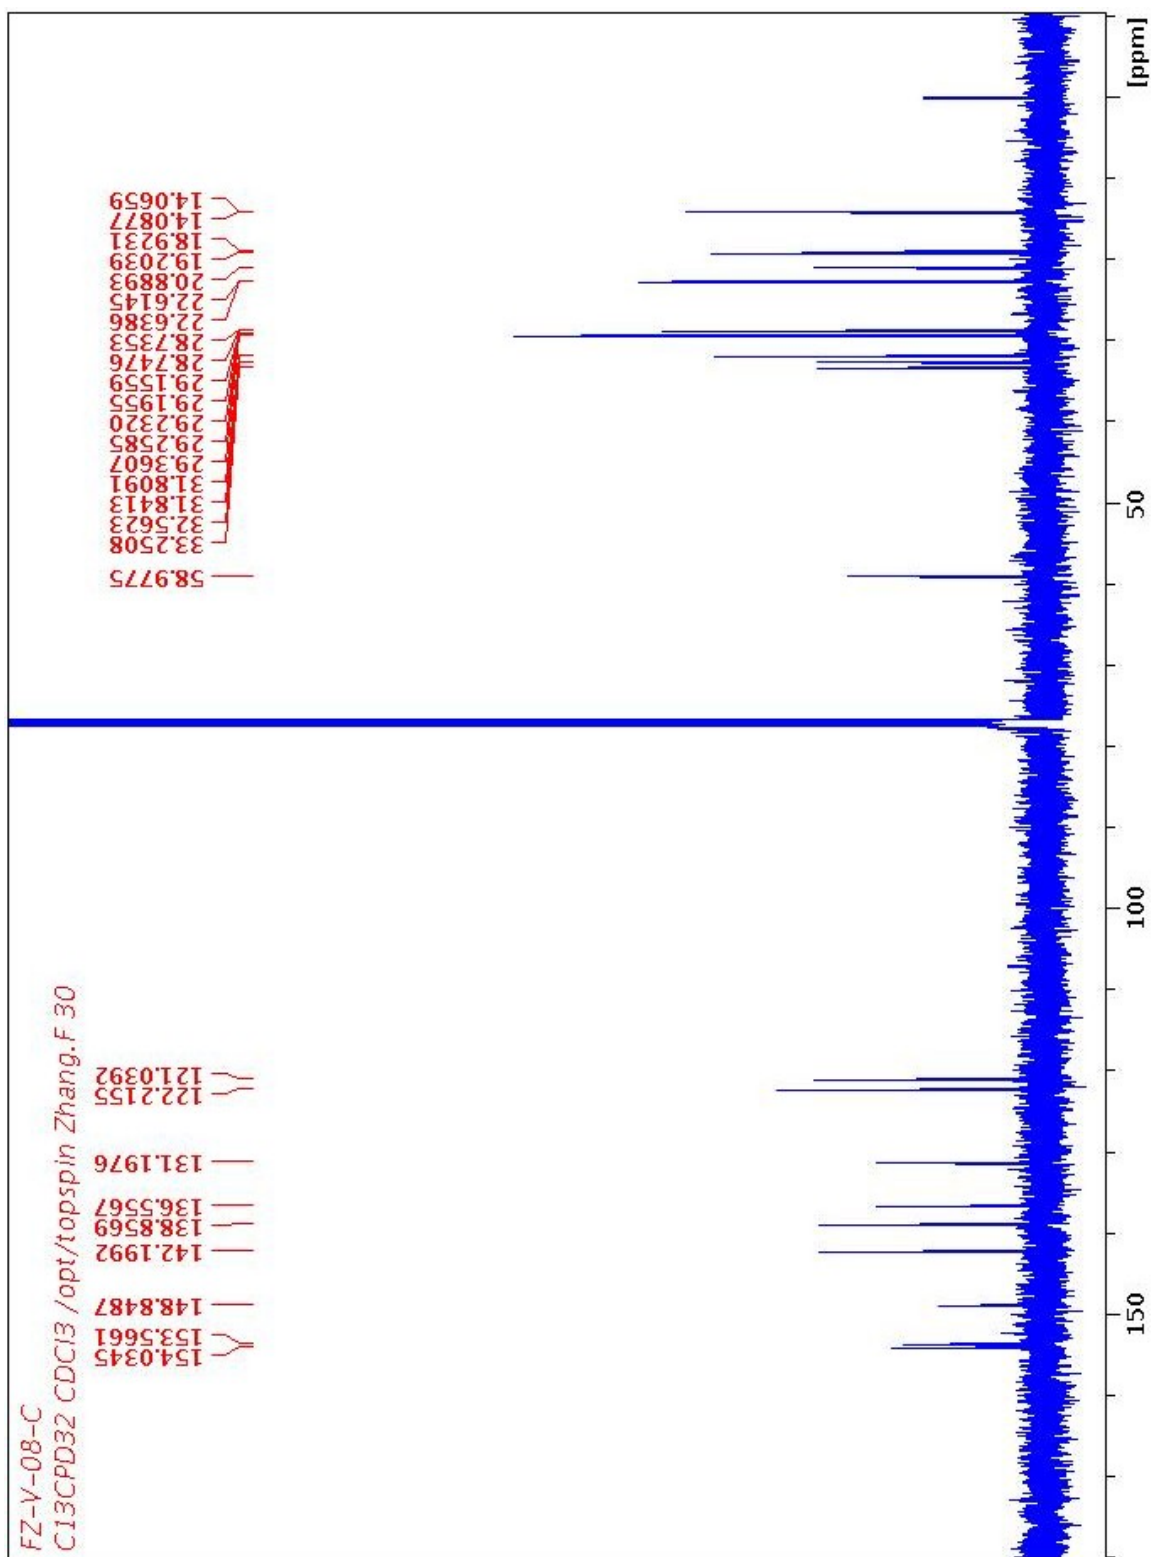

r110622r03 #2-49 RT: 0.02-0.67 AV: 48 NL: 5.94E8  
T: FTMS + p NSIFull.ms [300.00-2000.00]

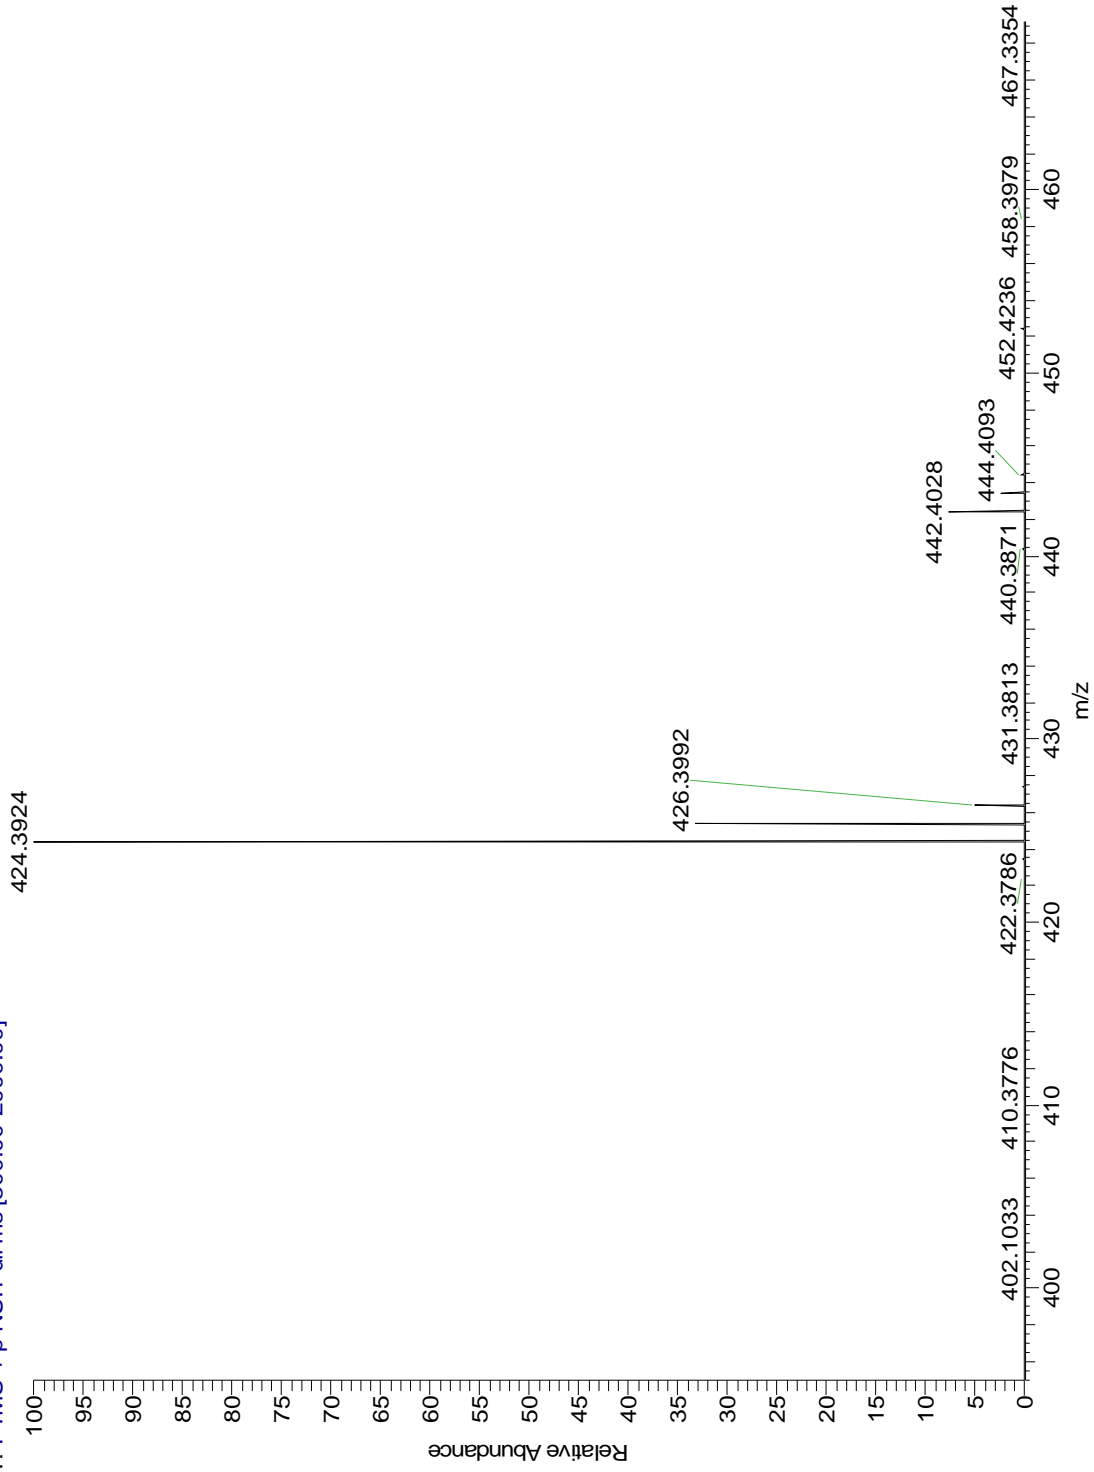

Supplement: NIHMS324943-supplement-1_si_001.pdf [file NIHMS324943-supplement-1_si_001.pdf]
